# Supplementary material for: Secondary Metabolites with Anti-Inflammatory Activity from Laurencia majuscula Collected in the Red Sea
Source: MDPI journal article supplement (doi:10.3390/md21020079), 2023-01-24
Supplement: s1 [file s1]

# Supplementary Materials for

## Secondary Metabolites with Anti-inflammatory Activity from *Laurencia majuscula* Collected in the Red Sea

Mohamed A. Tammam <sup>1,2</sup>, Maria G. Daskalaki <sup>3,4</sup>, Nikolaos Tsoureas <sup>5</sup>, Ourania Kolliniati <sup>3,4</sup>, Aldoushy Mahdy <sup>6</sup>, Sotirios C. Kampranis <sup>7</sup>, Christos Tsatsanis <sup>3,4</sup>, Vassilios Roussis <sup>1</sup> and Efstathia Ioannou <sup>1,\*</sup>

<sup>1</sup> Section of Pharmacognosy and Chemistry of Natural Products, Department of Pharmacy, National and Kapodistrian University of Athens, Panepistimiopolis Zografou, 15771 Athens, Greece; mtammam@pharm.uoa.gr (M.A.T.); roussis@pharm.uoa.gr (V.R.)

<sup>2</sup> Department of Biochemistry, Faculty of Agriculture, Fayoum University, 63514 Fayoum, Egypt

<sup>3</sup> Laboratory of Clinical Chemistry, Medical School, University of Crete, 70013 Heraklion, Greece; m.daskalaki@med.uoc.gr (M.G.D.); raliakolliniatis21@gmail.com (O.K.); tsatsani@uoc.gr (C.T.)

<sup>4</sup> Institute of Molecular Biology and Biotechnology, FORTH, 71100 Heraklion, Greece

<sup>5</sup> Laboratory of Inorganic Chemistry, Department of Chemistry, National and Kapodistrian University of Athens, Panepistimiopolis Zografou, 15784 Athens, Greece; ntsoureas@chem.uoa.gr (N.T.)

<sup>6</sup> Department of Zoology, Faculty of Science, Al-Azhar University (Assiut Branch), 71524 Assiut, Egypt; aldoushy@azhar.edu.eg (A.M.)

<sup>7</sup> Section of Plant Biochemistry, Department of Plant and Environmental Sciences, University of Copenhagen, Thorvaldsensvej 40, 1871 Frederiksberg, Denmark; soka@plen.ku.dk (S.C.K.)

\* Correspondence: eioannou@pharm.uoa.gr; Tel.: +30-210-7274913

### Table of Contents

|                                                                                                                  |    |
|------------------------------------------------------------------------------------------------------------------|----|
| <b>Table S1.</b> <sup>13</sup> C and <sup>1</sup> H NMR data (δ in ppm, J in Hz) of compounds <b>23–26</b> ..... | 5  |
| <b>Table S2.</b> Collection and refinement details for compounds <b>1</b> and <b>2</b> . ....                    | 6  |
| <b>Figure S1.</b> <sup>1</sup> H NMR spectrum (CDCl <sub>3</sub> ) of compound <b>1</b> . ....                   | 7  |
| <b>Figure S2.</b> HSQC spectrum (CDCl <sub>3</sub> ) of compound <b>1</b> .....                                  | 7  |
| <b>Figure S3.</b> HMBC spectrum (CDCl <sub>3</sub> ) of compound <b>1</b> .....                                  | 8  |
| <b>Figure S4.</b> COSY spectrum (CDCl <sub>3</sub> ) of compound <b>1</b> . ....                                 | 8  |
| <b>Figure S5.</b> NOESY spectrum (CDCl <sub>3</sub> ) of compound <b>1</b> .....                                 | 9  |
| <b>Figure S6.</b> Mass spectrum (HR-APCIMS) of compound <b>1</b> . ....                                          | 9  |
| <b>Figure S7.</b> <sup>1</sup> H NMR spectrum (CDCl <sub>3</sub> ) of compound <b>2</b> . ....                   | 10 |
| <b>Figure S8.</b> HSQC spectrum (CDCl <sub>3</sub> ) of compound <b>2</b> .....                                  | 10 |
| <b>Figure S9.</b> HMBC spectrum (CDCl <sub>3</sub> ) of compound <b>2</b> .....                                  | 11 |
| <b>Figure S10.</b> COSY spectrum (CDCl <sub>3</sub> ) of compound <b>2</b> . ....                                | 11 |

|                                                                                                             |    |
|-------------------------------------------------------------------------------------------------------------|----|
| <b>Figure S11.</b> NOESY spectrum (CDCl <sub>3</sub> ) of compound <b>2</b> .....                           | 12 |
| <b>Figure S12.</b> Mass spectrum (HR-APCIMS) of compound <b>2</b> .....                                     | 12 |
| <b>Figure S13.</b> <sup>1</sup> H NMR spectrum (CDCl <sub>3</sub> ) of compound <b>3</b> .....              | 13 |
| <b>Figure S14.</b> HSQC spectrum (CDCl <sub>3</sub> ) of compound <b>3</b> .....                            | 13 |
| <b>Figure S15.</b> COSY spectrum (CDCl <sub>3</sub> ) of compound <b>3</b> .....                            | 14 |
| <b>Figure S16.</b> NOESY spectrum (CDCl <sub>3</sub> ) of compound <b>3</b> .....                           | 14 |
| <b>Figure S17.</b> Mass spectrum (HR-APCIMS) of compound <b>3</b> .....                                     | 15 |
| <b>Figure S18.</b> <sup>1</sup> H NMR spectrum (C <sub>6</sub> D <sub>6</sub> ) of compound <b>4</b> .....  | 16 |
| <b>Figure S19.</b> <sup>13</sup> C NMR spectrum (C <sub>6</sub> D <sub>6</sub> ) of compound <b>4</b> ..... | 16 |
| <b>Figure S20.</b> Mass spectrum (LR-EIMS) of compound <b>4</b> .....                                       | 17 |
| <b>Figure S21.</b> <sup>1</sup> H NMR spectrum (C <sub>6</sub> D <sub>6</sub> ) of compound <b>5</b> .....  | 18 |
| <b>Figure S22.</b> HSQC spectrum (C <sub>6</sub> D <sub>6</sub> ) of compound <b>5</b> .....                | 18 |
| <b>Figure S23.</b> HMBC spectrum (C <sub>6</sub> D <sub>6</sub> ) of compound <b>5</b> .....                | 19 |
| <b>Figure S24.</b> COSY spectrum (C <sub>6</sub> D <sub>6</sub> ) of compound <b>5</b> .....                | 19 |
| <b>Figure S25.</b> NOESY spectrum (C <sub>6</sub> D <sub>6</sub> ) of compound <b>5</b> .....               | 20 |
| <b>Figure S26.</b> Mass spectrum (HR-ESIMS) of compound <b>5</b> .....                                      | 20 |
| <b>Figure S27.</b> <sup>1</sup> H NMR spectrum (CDCl <sub>3</sub> ) of compound <b>6</b> .....              | 21 |
| <b>Figure S28.</b> Mass spectrum (LR-EIMS) of compound <b>6</b> .....                                       | 21 |
| <b>Figure S29.</b> <sup>1</sup> H NMR spectrum (CDCl <sub>3</sub> ) of compound <b>7</b> .....              | 22 |
| <b>Figure S30.</b> HSQC spectrum (CDCl <sub>3</sub> ) of compound <b>7</b> .....                            | 22 |
| <b>Figure S31.</b> HMBC spectrum (CDCl <sub>3</sub> ) of compound <b>7</b> .....                            | 23 |
| <b>Figure S32.</b> COSY spectrum (CDCl <sub>3</sub> ) of compound <b>7</b> .....                            | 23 |
| <b>Figure S33.</b> Mass spectrum (HR-ESIMS) of compound <b>7</b> .....                                      | 24 |
| <b>Figure S34.</b> <sup>1</sup> H NMR spectrum (CDCl <sub>3</sub> ) of compound <b>8</b> .....              | 25 |
| <b>Figure S35.</b> HSQC spectrum (CDCl <sub>3</sub> ) of compound <b>8</b> .....                            | 25 |
| <b>Figure S36.</b> HMBC spectrum (CDCl <sub>3</sub> ) of compound <b>8</b> .....                            | 26 |
| <b>Figure S37.</b> COSY spectrum (CDCl <sub>3</sub> ) of compound <b>8</b> .....                            | 26 |
| <b>Figure S38.</b> Mass spectrum (HR-APCIMS) of compound <b>8</b> .....                                     | 27 |
| <b>Figure S39.</b> <sup>1</sup> H NMR spectrum (CDCl <sub>3</sub> ) of compound <b>9</b> .....              | 28 |
| <b>Figure S40.</b> Mass spectrum (LR-EIMS) of compound <b>9</b> .....                                       | 28 |

|                                                                                                 |    |
|-------------------------------------------------------------------------------------------------|----|
| <b>Figure S41.</b> $^1\text{H}$ NMR spectrum ( $\text{CDCl}_3$ ) of compound <b>10</b> .        | 29 |
| <b>Figure S42.</b> HSQC spectrum ( $\text{CDCl}_3$ ) of compound <b>10</b> .                    | 29 |
| <b>Figure S43.</b> HMBC spectrum ( $\text{CDCl}_3$ ) of compound <b>10</b> .                    | 30 |
| <b>Figure S44.</b> COSY spectrum ( $\text{CDCl}_3$ ) of compound <b>10</b> .                    | 30 |
| <b>Figure S45.</b> NOESY spectrum ( $\text{CDCl}_3$ ) of compound <b>10</b> .                   | 31 |
| <b>Figure S46.</b> Mass spectrum (HR-ESIMS) of compound <b>10</b> .                             | 31 |
| <b>Figure S47.</b> $^1\text{H}$ NMR spectrum ( $\text{CDCl}_3$ ) of compound <b>11</b> .        | 32 |
| <b>Figure S48.</b> HSQC spectrum ( $\text{CDCl}_3$ ) of compound <b>11</b> .                    | 32 |
| <b>Figure S49.</b> HMBC spectrum ( $\text{CDCl}_3$ ) of compound <b>11</b> .                    | 33 |
| <b>Figure S50.</b> COSY spectrum ( $\text{CDCl}_3$ ) of compound <b>11</b> .                    | 33 |
| <b>Figure S51.</b> Mass spectrum (LR-EIMS) of compound <b>11</b> .                              | 34 |
| <b>Figure S52.</b> $^1\text{H}$ NMR spectrum ( $\text{CDCl}_3$ ) of compound <b>12</b> .        | 35 |
| <b>Figure S53.</b> Mass spectrum (LR-EIMS) of compound <b>12</b> .                              | 35 |
| <b>Figure S54.</b> $^1\text{H}$ NMR spectrum ( $\text{CDCl}_3$ ) of compound <b>13</b> .        | 36 |
| <b>Figure S55.</b> Mass spectrum (LR-EIMS) of compound <b>13</b> .                              | 36 |
| <b>Figure S56.</b> $^1\text{H}$ NMR spectrum ( $\text{CDCl}_3$ ) of compound <b>14</b> .        | 37 |
| <b>Figure S57.</b> HSQC spectrum ( $\text{CDCl}_3$ ) of compound <b>14</b> .                    | 37 |
| <b>Figure S58.</b> HMBC spectrum ( $\text{CDCl}_3$ ) of compound <b>14</b> .                    | 38 |
| <b>Figure S59.</b> COSY spectrum ( $\text{CDCl}_3$ ) of compound <b>14</b> .                    | 38 |
| <b>Figure S60.</b> Mass spectrum (HR-ESIMS) of compound <b>14</b> .                             | 39 |
| <b>Figure S61.</b> $^1\text{H}$ NMR spectrum ( $\text{CDCl}_3$ ) of compound <b>15</b> .        | 40 |
| <b>Figure S62.</b> Mass spectrum (LR-EIMS) of compound <b>15</b> .                              | 40 |
| <b>Figure S63.</b> $^1\text{H}$ NMR spectrum ( $\text{CDCl}_3$ ) of compound <b>16</b> .        | 41 |
| <b>Figure S64.</b> Mass spectrum (LR-EIMS) of compound <b>16</b> .                              | 41 |
| <b>Figure S65.</b> $^1\text{H}$ NMR spectrum ( $\text{C}_6\text{D}_6$ ) of compound <b>17</b> . | 42 |
| <b>Figure S66.</b> Mass spectrum (LR-EIMS) of compound <b>17</b> .                              | 42 |
| <b>Figure S67.</b> $^1\text{H}$ NMR spectrum ( $\text{CDCl}_3$ ) of compound <b>18</b> .        | 43 |
| <b>Figure S68.</b> Mass spectrum (LR-EIMS) of compound <b>18</b> .                              | 43 |
| <b>Figure S69.</b> $^1\text{H}$ NMR spectrum ( $\text{C}_6\text{D}_6$ ) of compound <b>19</b> . | 44 |
| <b>Figure S70.</b> Mass spectrum (LR-EIMS) of compound <b>19</b> .                              | 44 |

|                                                                                                                         |    |
|-------------------------------------------------------------------------------------------------------------------------|----|
| <b>Figure S71.</b> $^1\text{H}$ NMR spectrum ( $\text{CDCl}_3$ ) of compound <b>20</b> .                                | 45 |
| <b>Figure S72.</b> Mass spectrum (LR-EIMS) of compound <b>20</b> .                                                      | 45 |
| <b>Figure S73.</b> $^1\text{H}$ NMR spectrum ( $\text{CDCl}_3$ ) of compound <b>21</b> .                                | 46 |
| <b>Figure S74.</b> Mass spectrum (LR-EIMS) of compound <b>21</b> .                                                      | 46 |
| <b>Figure S75.</b> $^1\text{H}$ NMR spectrum ( $\text{CDCl}_3$ ) of compound <b>22</b> .                                | 47 |
| <b>Figure S76.</b> Mass spectrum (LR-EIMS) of compound <b>22</b> .                                                      | 47 |
| <b>Figure S77.</b> $^1\text{H}$ NMR spectrum ( $\text{CDCl}_3$ ) of compounds <b>23</b> and <b>24</b> (at a 1:1 ratio). | 48 |
| <b>Figure S78.</b> HSQC spectrum ( $\text{CDCl}_3$ ) of compounds <b>23</b> and <b>24</b> (at a 1:1 ratio).             | 48 |
| <b>Figure S79.</b> HMBC spectrum ( $\text{CDCl}_3$ ) of compounds <b>23</b> and <b>24</b> (at a 1:1 ratio).             | 49 |
| <b>Figure S80.</b> COSY spectrum ( $\text{CDCl}_3$ ) of compounds <b>23</b> and <b>24</b> (at a 1:1 ratio).             | 49 |
| <b>Figure S81.</b> NOESY spectrum ( $\text{CDCl}_3$ ) of compounds <b>23</b> and <b>24</b> (at a 1:1 ratio).            | 50 |
| <b>Figure S82.</b> $^1\text{H}$ NMR spectrum ( $\text{CDCl}_3$ ) of compounds <b>23–26</b> (at a 1:2:1:2 ratio).        | 51 |
| <b>Figure S83.</b> HSQC spectrum ( $\text{CDCl}_3$ ) of compounds <b>23–26</b> (at a 1:2:1:2 ratio).                    | 51 |
| <b>Figure S84.</b> HMBC spectrum ( $\text{CDCl}_3$ ) of compounds <b>23–26</b> (at a 1:2:1:2 ratio).                    | 52 |
| <b>Figure S85.</b> COSY spectrum ( $\text{CDCl}_3$ ) of compounds <b>23–26</b> (at a 1:2:1:2 ratio).                    | 52 |
| <b>Figure S86.</b> NOESY spectrum ( $\text{CDCl}_3$ ) of compounds <b>23–26</b> (at a 1:2:1:2 ratio).                   | 53 |

**Table S1.** <sup>13</sup>C and <sup>1</sup>H NMR data ( $\delta$  in ppm, *J* in Hz) of compounds **23–26**.

| Position | 23         |                      | 24         |                     | 25         |                      | 26         |                      |
|----------|------------|----------------------|------------|---------------------|------------|----------------------|------------|----------------------|
|          | $\delta_C$ | $\delta_H$           | $\delta_C$ | $\delta_H$          | $\delta_C$ | $\delta_H$           | $\delta_C$ | $\delta_H$           |
| 1        | 78.0       | 3.23 (d, 2.3)        | 78.9       | 3.28 (d, 2.3)       | 78.0       | 3.24 (d, 2.1)        | 78.0       | 3.23 (d, 2.1)        |
| 2        | 84.6       | -                    | 84.5       | -                   | 84.5       | -                    | 84.5       | -                    |
| 3        | 111.5      | 5.63 (t, 2.3)        | 111.7      | 5.66 (t, 2.1)       | 111.7      | 5.65 (t, 2.2)        | 111.5      | 5.63 (t, 2.2)        |
| 4        | 141.4      | 5.95 (t, 10.5)       | 140.3      | 5.85 (t, 10.5)      | 141.6      | 5.97 (t, 10.5)       | 141.8      | 6.17 (t, 10.7)       |
| 5        | 58.2       | 4.78 (t, 10.5)       | 58.7       | 4.85 (t, 10.5)      | 58.2       | 4.77 (m)             | 58.7       | 4.85 (m)             |
| 6        | 51.5       | 2.89 (dd, 10.5, 1.7) | 51.2       | 2.03 (m)            | 51.5       | 2.90 (m)             | 51.2       | 2.03 (m)             |
| 7        | 77.8       | 4.80 (d, 5.2)        | 78.2       | 4.76 (d, 5.2)       | 77.4       | 4.79 (d, 5.2)        | 78.2       | 4.77 (d, 5.0)        |
| 8        | 38.8       | 1.91 (m), 1.67 (m)   | 40.3       | 1.80 (m), 1.61 (m)  | 38.8       | 1.91 (m), 1.67 (m)   | 40.3       | 1.84 (m), 1.66 (m)   |
| 9        | 78.6       | 4.41 (dd, 7.8, 4.9)  | 77.2       | 4.48 (dd, 6.7, 4.5) | 78.6       | 4.41 (dd, 7.8, 4.9)  | 78.8       | 4.57 (dd, 7.0, 4.6)  |
| 10       | 83.4       | 5.02 (t, 4.9)        | 84.4       | 5.41 (t, 4.5)       | 83.1       | 4.96 (t, 5.0)        | 83.3       | 5.32 (t, 5.0)        |
| 11       | 50.0       | 2.45 (brd, 5.3)      | 49.8       | 2.30 (dd, 4.6, 2.3) | 48.2       | 2.37 (brd, 5.0)      | 53.6       | 2.35 (dd, 4.9, 2.3)  |
| 12       | 104.4      | -                    | 104.4      | -                   | 104.8      | -                    | 105.4      | -                    |
| 13       | 66.4       | 3.75 (dd, 11.2, 2.4) | 64.9       | 4.0 (dd, 11.4, 1.6) | 67.8       | 3.79 (dd, 11.0, 2.3) | 60.4       | 3.83 (dd, 10.9, 2.0) |
| 14       | 25.7       | 2.05 (m), 1.65 (m)   | 28.4       | 2.01 (m), 1.76 (m)  | 27.4       | 1.88 (m), 1.65 (m)   | 24.7       | 2.17 (m), 1.75 (m)   |
| 15       | 12.7       | 1.09 (m)             | 12.7       | 1.08 (m)            | 12.7       | 1.08 (m)             | 12.7       | 1.09 (m)             |
| OH       |            | 3.00 (brs)           |            | 3.01 (brs)          |            | 3.12 (brs)           |            | n.d.                 |

<sup>1</sup> Recorded in CDCl<sub>3</sub> at 400MHz. <sup>13</sup>C chemical shifts were determined through HMBC correlations. n.d.: not determined.

**Table S2.** Collection and refinement details for compounds **1** and **2**.

|                                        | <b>1</b>                                           | <b>2</b>                                           |
|----------------------------------------|----------------------------------------------------|----------------------------------------------------|
| Colour, habit                          | Colourless, Triangular plate                       | Colourless, Plate                                  |
| Size/mm                                | 0.127 x 0.065 x 0.04                               | 0.35 x 0.23 x 0.048                                |
| Empirical formula                      | C <sub>16</sub> H <sub>20</sub> BrClO <sub>3</sub> | C <sub>16</sub> H <sub>20</sub> BrClO <sub>3</sub> |
| FW                                     | 375.68                                             | 375.68                                             |
| Crystal system                         | Monoclinic                                         | Monoclinic                                         |
| Space group                            | <i>P</i> 2 <sub>1</sub>                            | <i>P</i> 2 <sub>1</sub>                            |
| <i>a</i> /Å                            | 8.5263(4)                                          | 7.4471(2)                                          |
| <i>b</i> /Å                            | 11.6240(6)                                         | 14.1825(3)                                         |
| <i>c</i> /Å                            | 8.7843(4)                                          | 8.1676(2)                                          |
| $\alpha$ /°                            | 90                                                 | 90                                                 |
| $\beta$ /°                             | 107.330(2)                                         | 107.6960(10)                                       |
| $\gamma$ /°                            | 90                                                 | 90                                                 |
| <i>V</i> /Å <sup>3</sup>               | 831.09(7)                                          | 821.83(3)                                          |
| <i>Z</i>                               | 4                                                  | 4                                                  |
| $\mu$ /mm <sup>-1</sup>                | 2.640                                              | 2.670                                              |
| <i>T</i> /K                            | 100                                                | 100                                                |
| $\theta$ min/max                       | 2.502/ 25.242                                      | 2.618/ 25.242                                      |
| Completeness to $\theta$ max (%)       | 99.9 to 25.242                                     | 99.9 to 25.242                                     |
| Reflections Total/ Independent         | 5085/4879                                          | 4991/4870                                          |
| Parameters                             | 192                                                | 192                                                |
| <i>R</i> <sub>int</sub>                | 0.0567                                             | 0.0385                                             |
| Final <i>R</i> 1, <i>wR</i> 2          | 0.0238/0.0578                                      | 0.0171/0.0422                                      |
| <i>Goof</i>                            | 1.066                                              | 1.035                                              |
| Largest peak, hole / e.Å <sup>-3</sup> | 0.6/-0.2                                           | 0.2/-0.3                                           |
| $\rho_{calc}$ /g cm <sup>-3</sup>      | 1.501                                              | 1.518                                              |
| Flack                                  | -0.010(2)                                          | -0.0090(18)                                        |
| CCDC Reference                         | CCDC 2226802                                       | CCDC 2226801                                       |

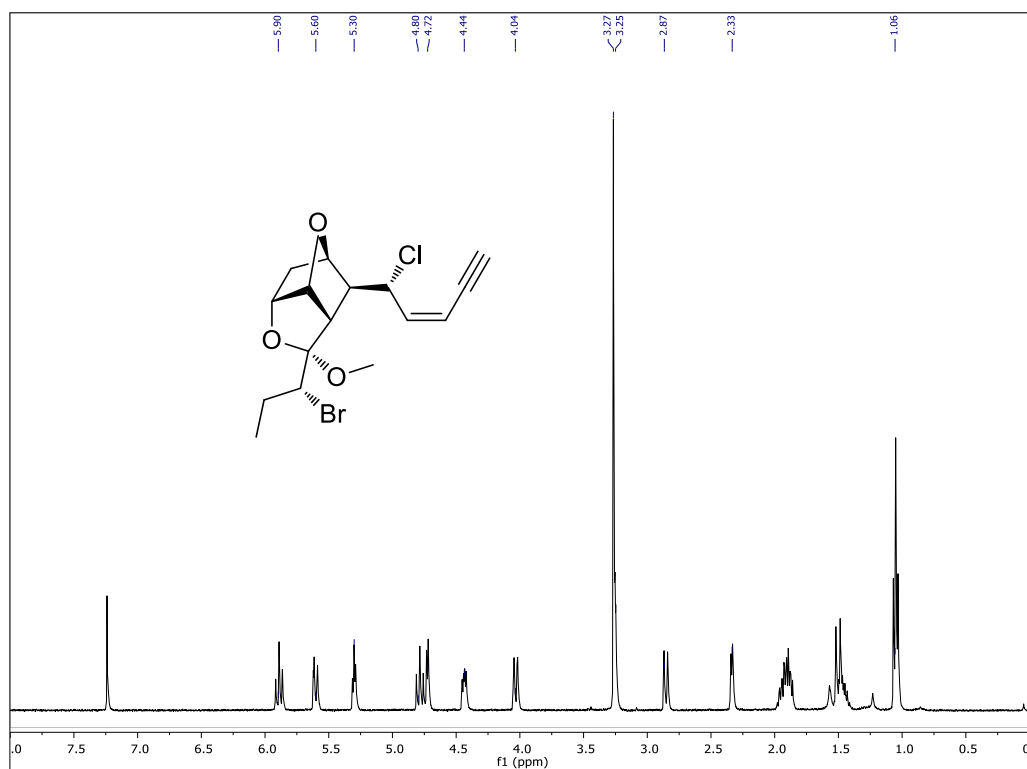

**Figure S1.** <sup>1</sup>H NMR spectrum (CDCl<sub>3</sub>) of compound **1**.

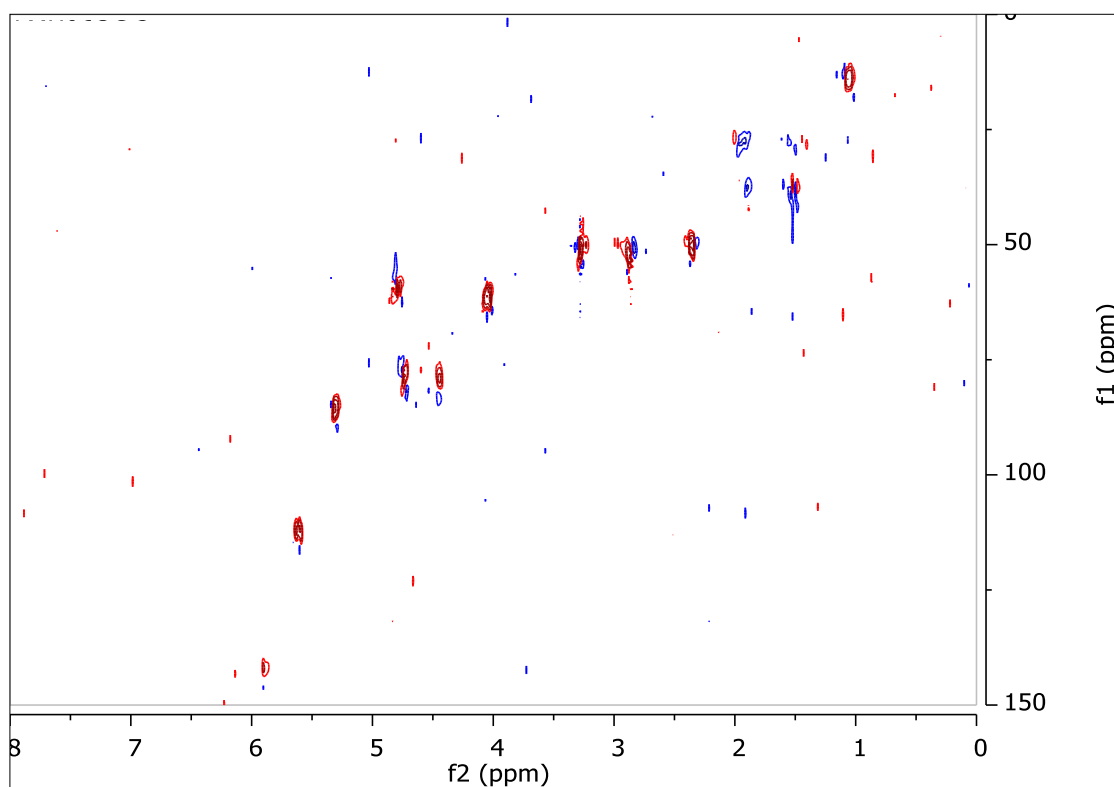

**Figure S2.** HSQC spectrum (CDCl<sub>3</sub>) of compound **1**.

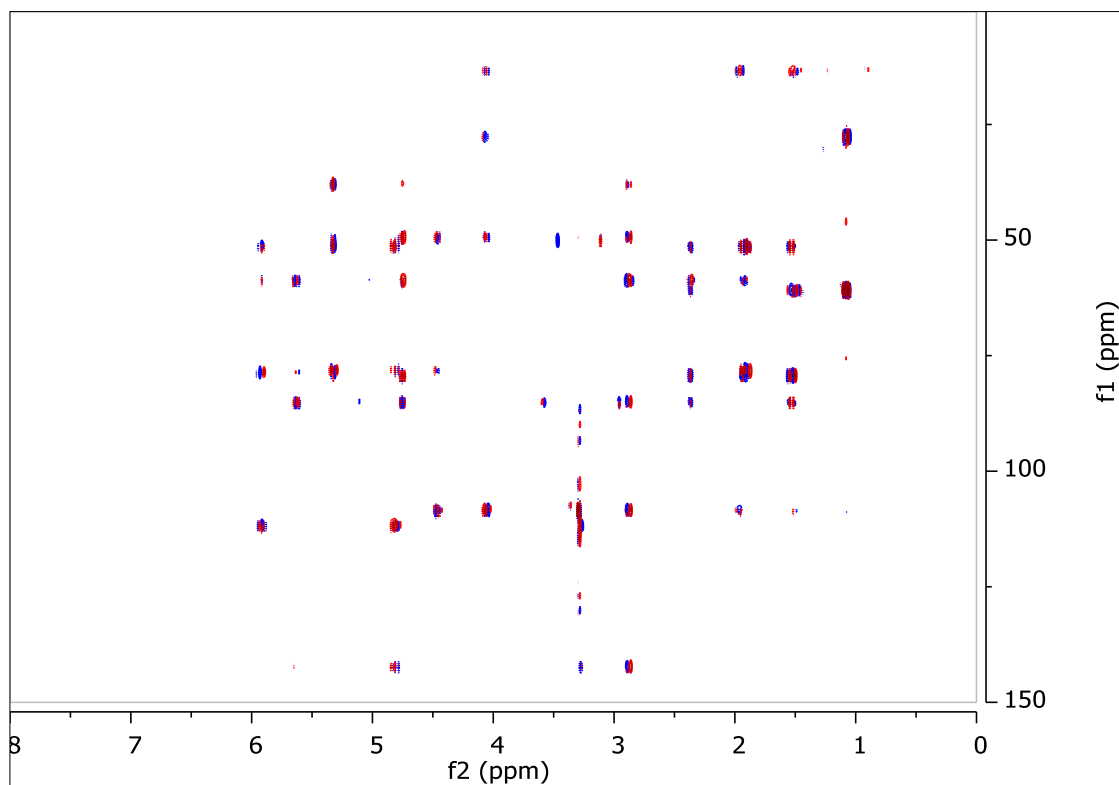

**Figure S3.** HMBC spectrum ( $\text{CDCl}_3$ ) of compound **1**.

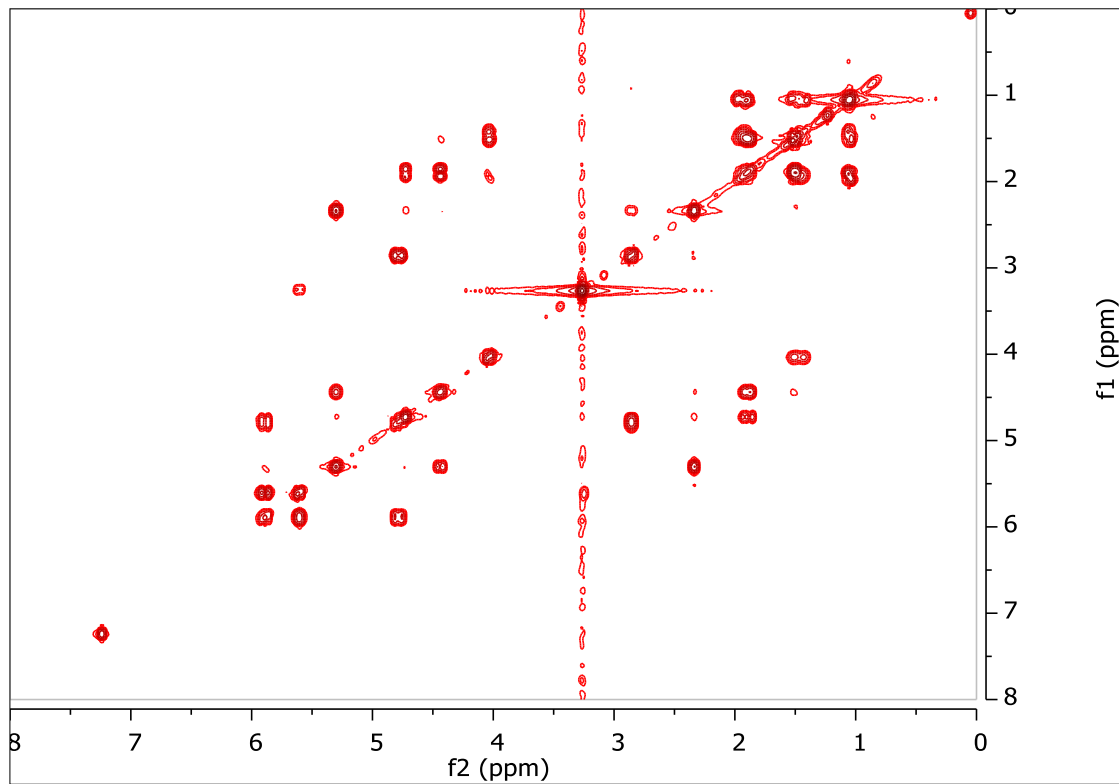

**Figure S4.** COSY spectrum ( $\text{CDCl}_3$ ) of compound **1**.



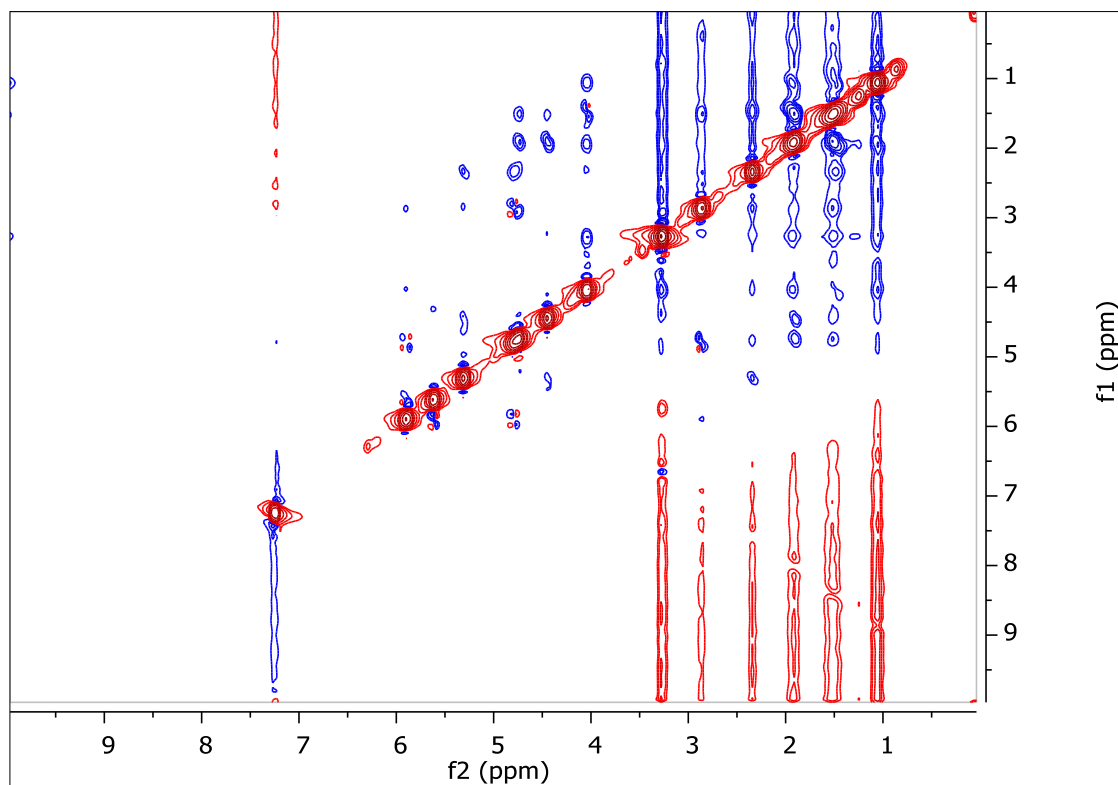

**Figure S5.** NOESY spectrum (CDCl<sub>3</sub>) of compound **1**.

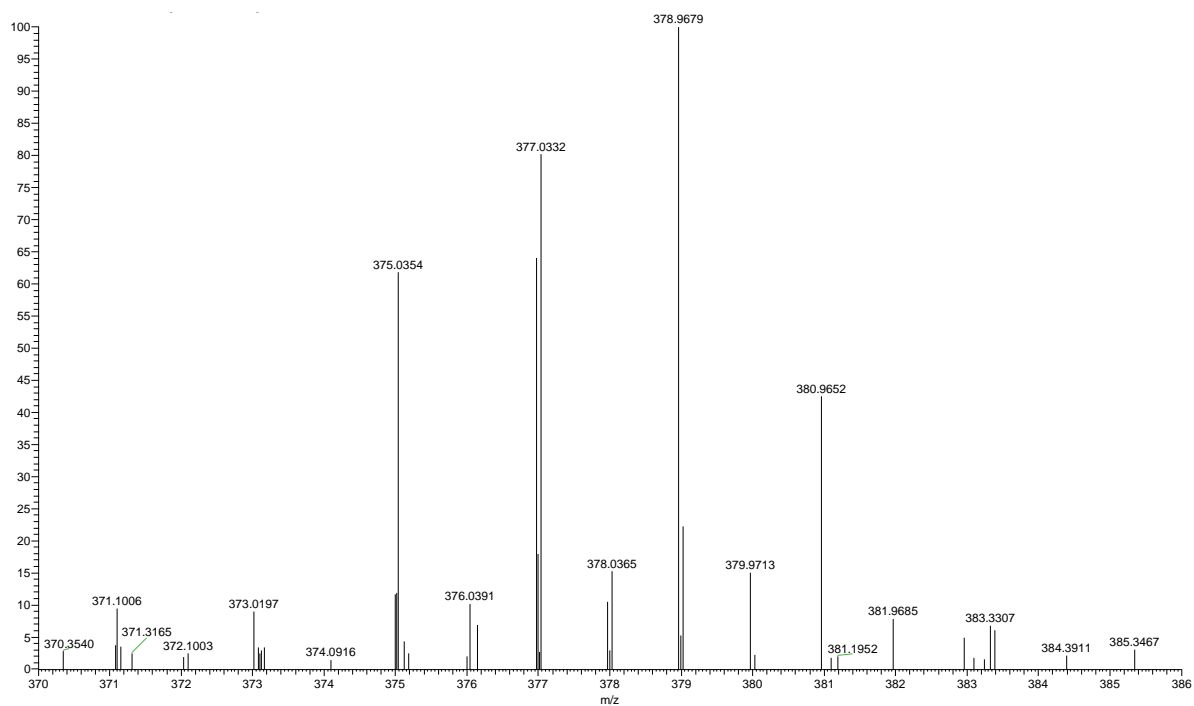

**Figure S6.** Mass spectrum (HR-APCIMS) of compound **1**.

[M + H]<sup>+</sup> observed at  $m/z$  375.0354, consistent with C<sub>16</sub>H<sub>21</sub><sup>79</sup>Br<sup>35</sup>ClO<sub>3</sub>

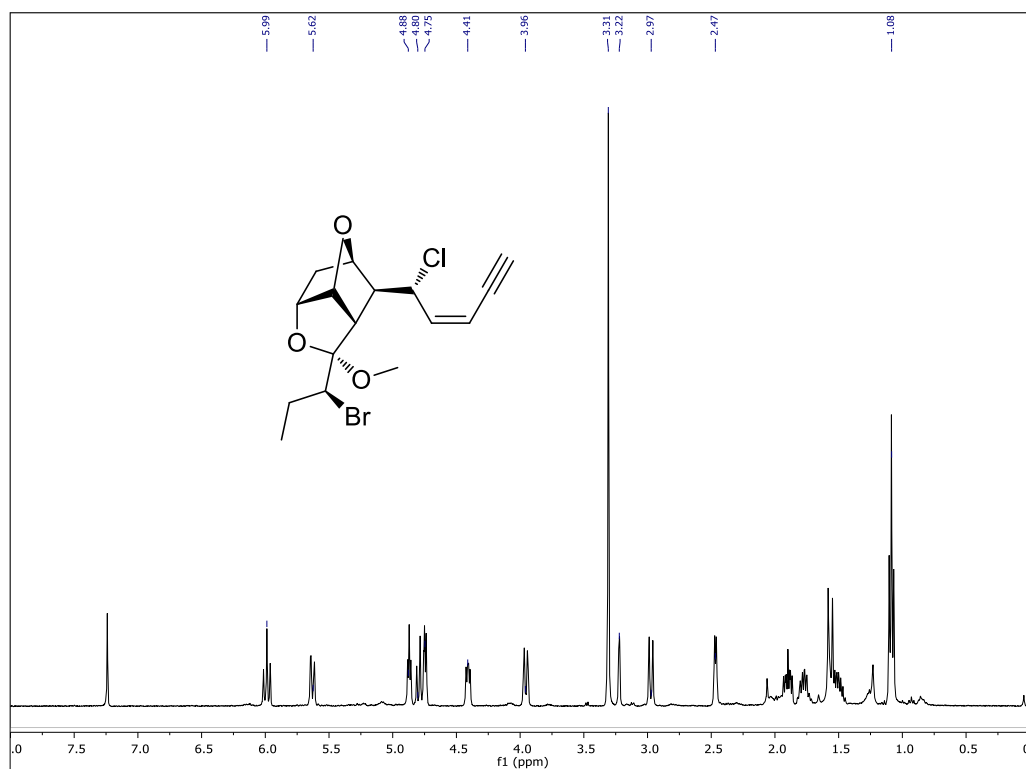

**Figure S7.**  $^1\text{H}$  NMR spectrum ( $\text{CDCl}_3$ ) of compound 2.

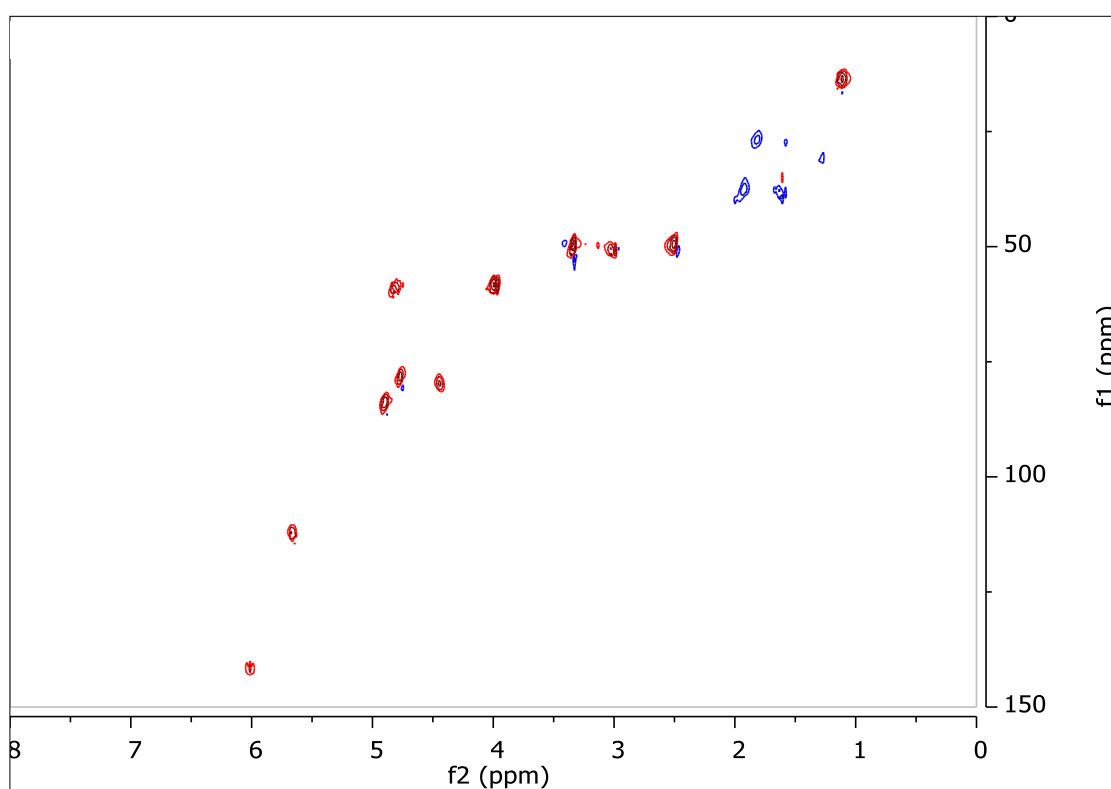

**Figure S8.** HSQC spectrum ( $\text{CDCl}_3$ ) of compound 2.

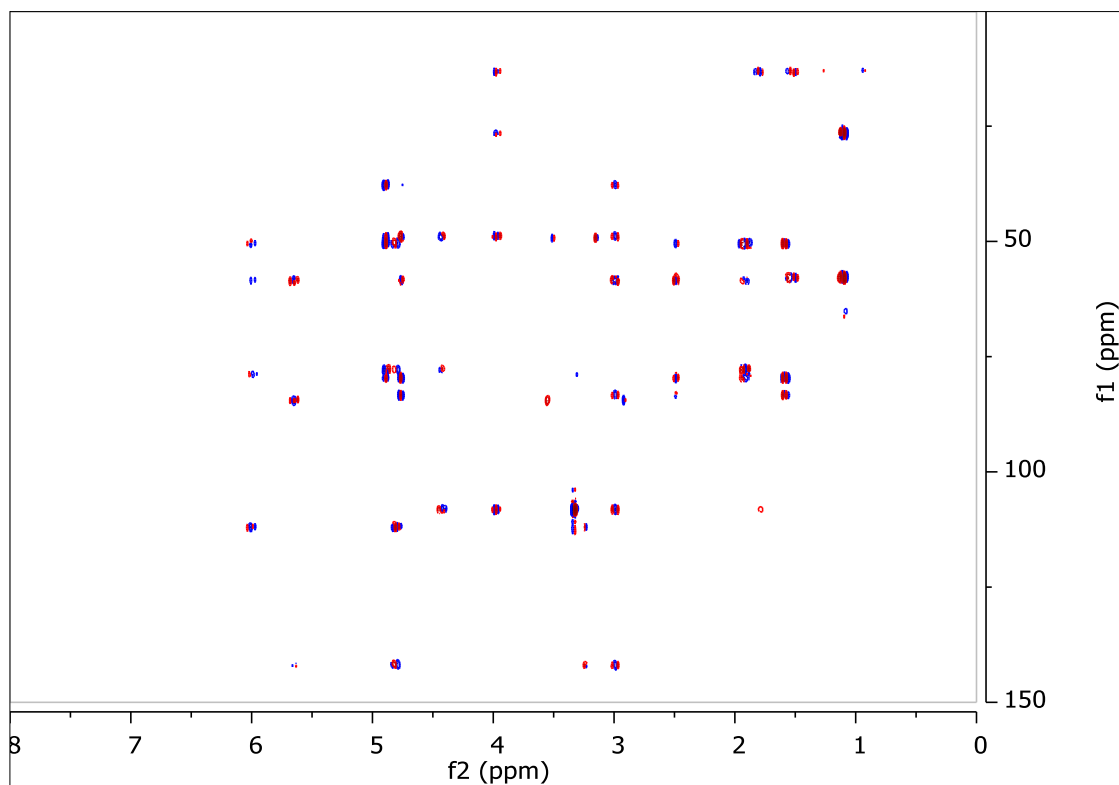

**Figure S9.** HMBC spectrum (CDCl<sub>3</sub>) of compound **2**.

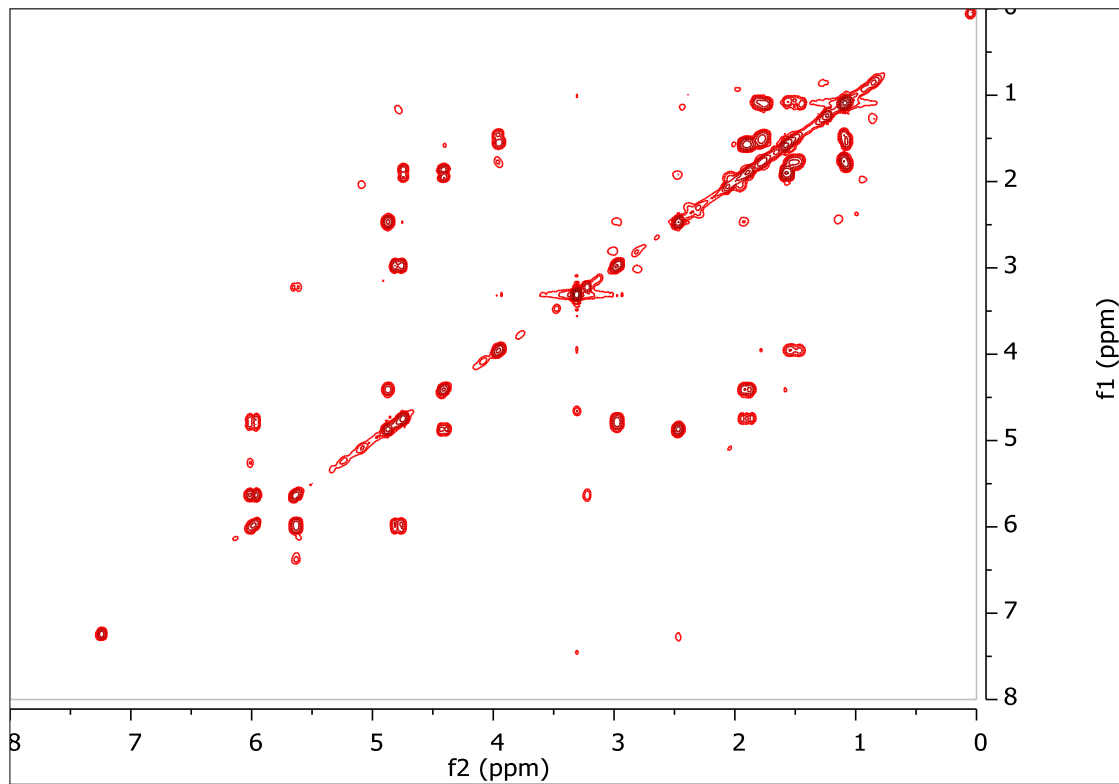

**Figure S10.** COSY spectrum (CDCl<sub>3</sub>) of compound **2**.

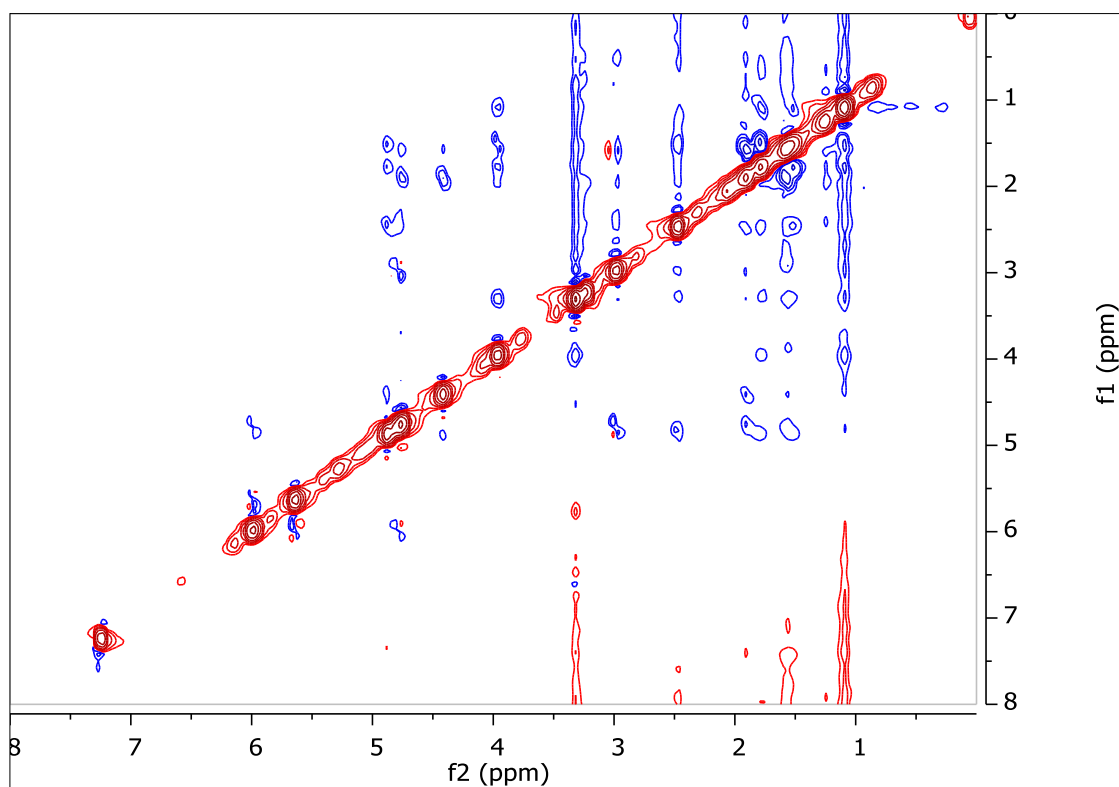

**Figure S11.** NOESY spectrum ( $\text{CDCl}_3$ ) of compound **2**.

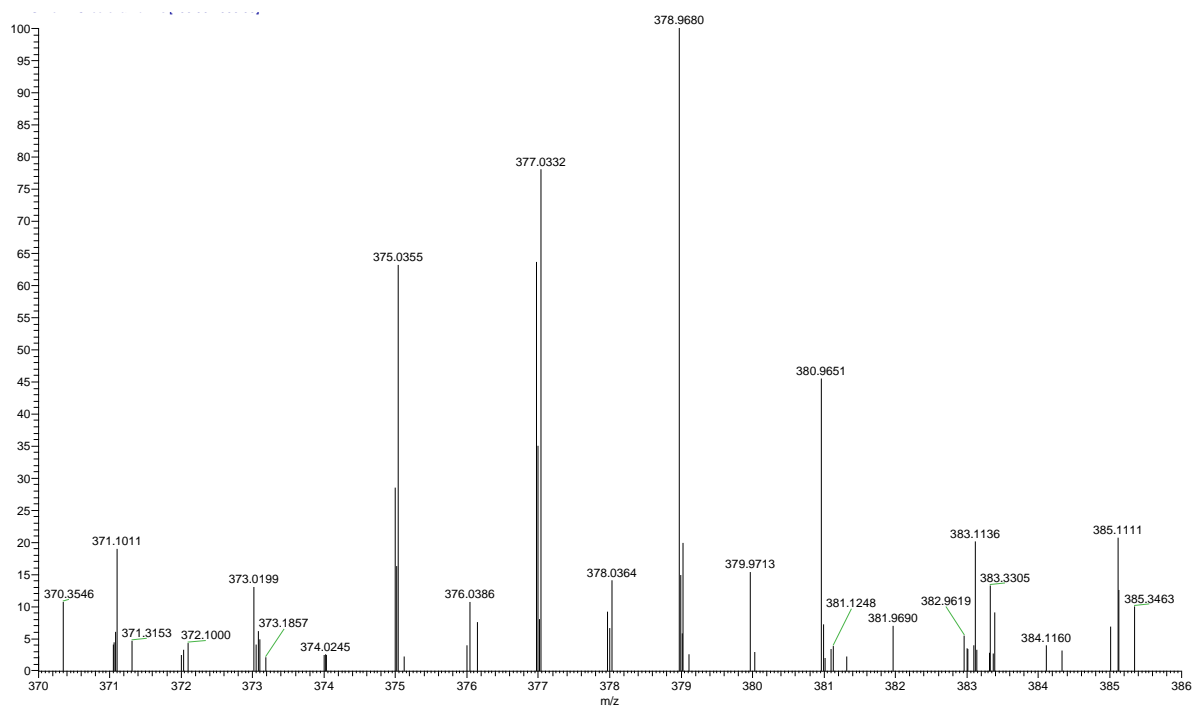

**Figure S12.** Mass spectrum (HR-APCIMS) of compound **2**.

$[\text{M} + \text{H}]^+$  observed at  $m/z$  375.0355, consistent with  $\text{C}_{16}\text{H}_{21}^{79}\text{Br}^{35}\text{ClO}_3$

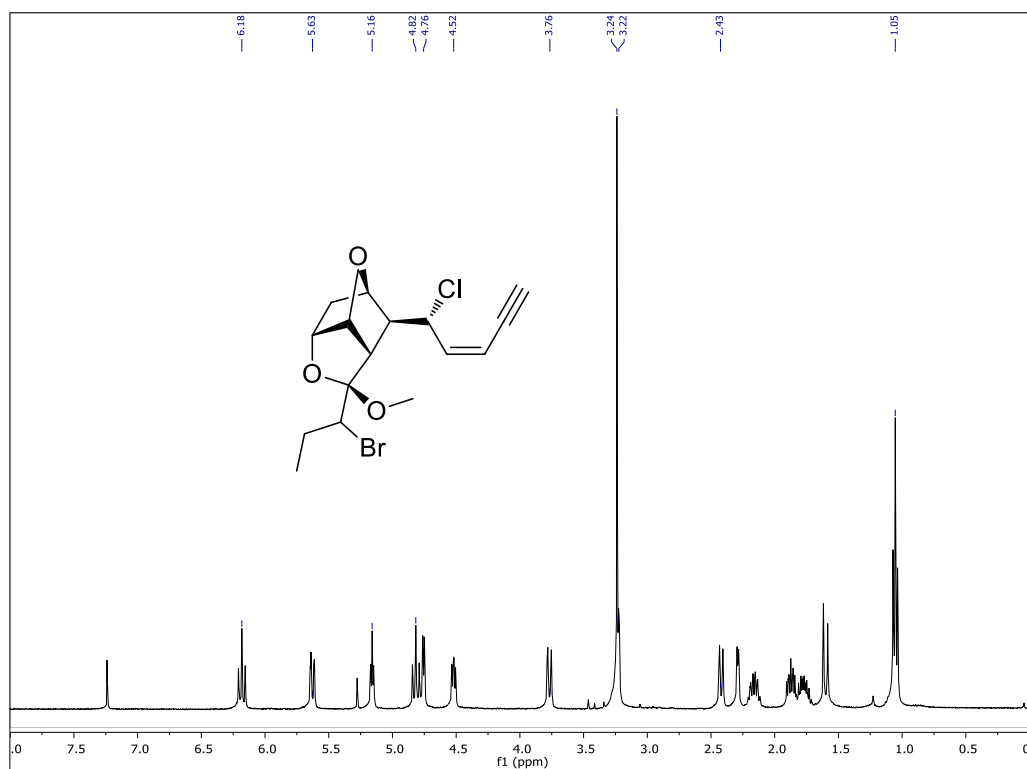

**Figure S13.** <sup>1</sup>H NMR spectrum (CDCl<sub>3</sub>) of compound 3.

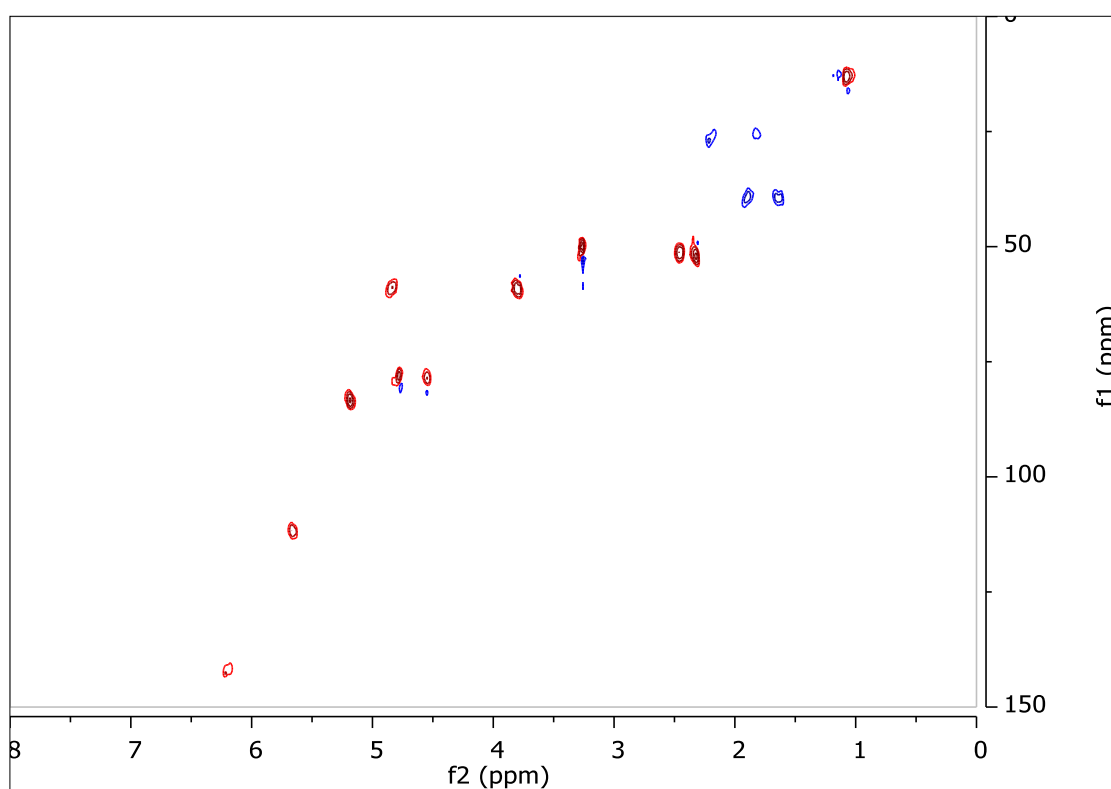

**Figure S14.** HSQC spectrum (CDCl<sub>3</sub>) of compound 3.

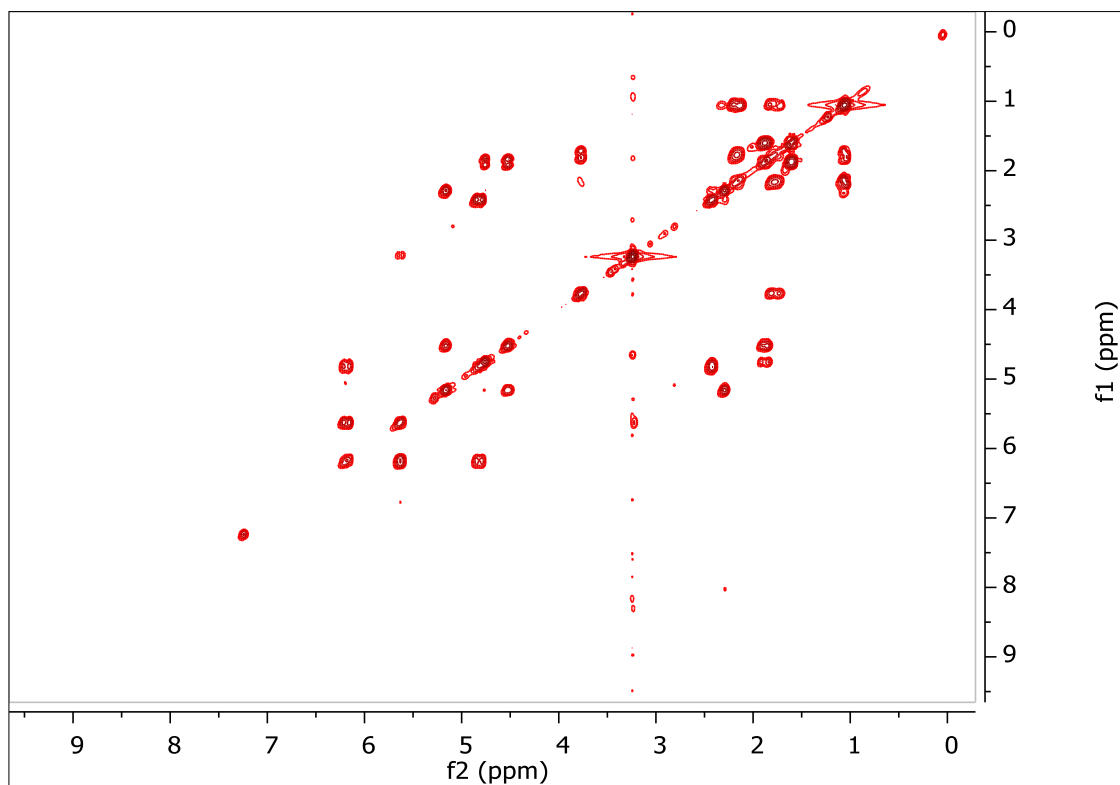

**Figure S15.** COSY spectrum ( $\text{CDCl}_3$ ) of compound 3.

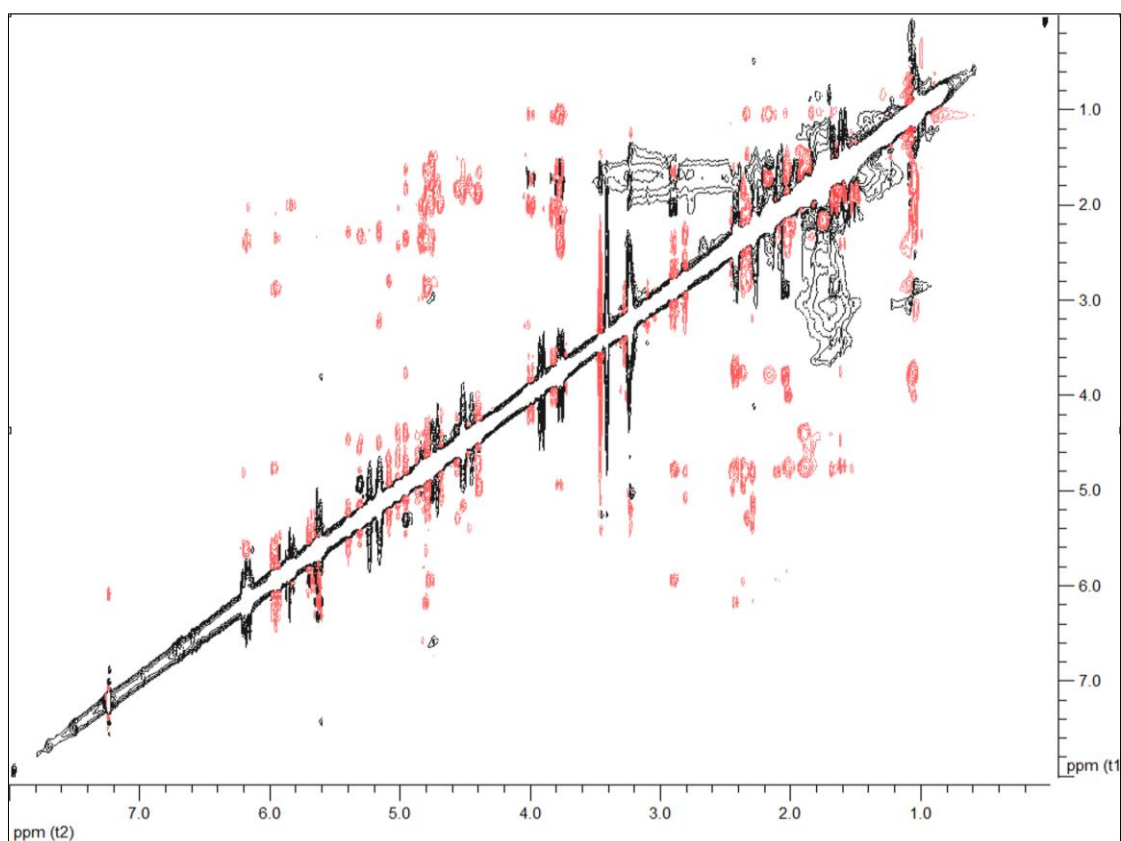

**Figure S16.** NOESY spectrum ( $\text{CDCl}_3$ ) of compound 3.

\*having already started to convert

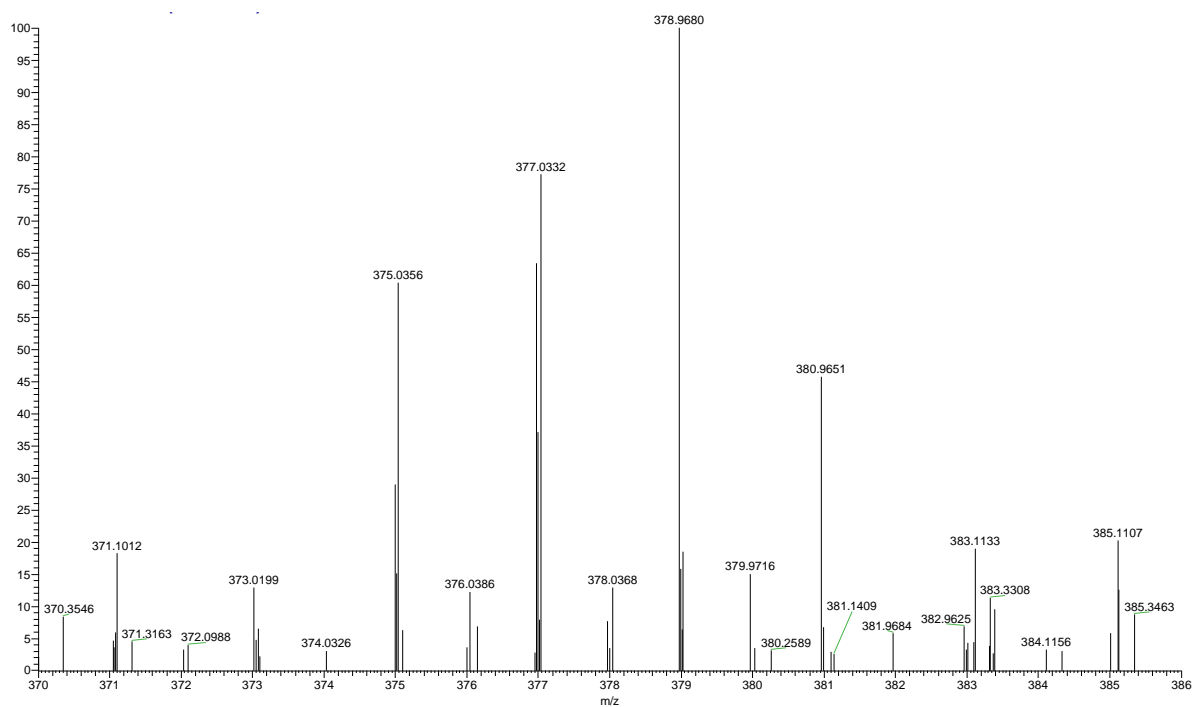

**Figure S17.** Mass spectrum (HR-APCIMS) of compound **3**.  
[M + H]<sup>+</sup> observed at  $m/z$  375.0356, consistent with C<sub>16</sub>H<sub>21</sub><sup>79</sup>Br<sup>35</sup>ClO<sub>3</sub>

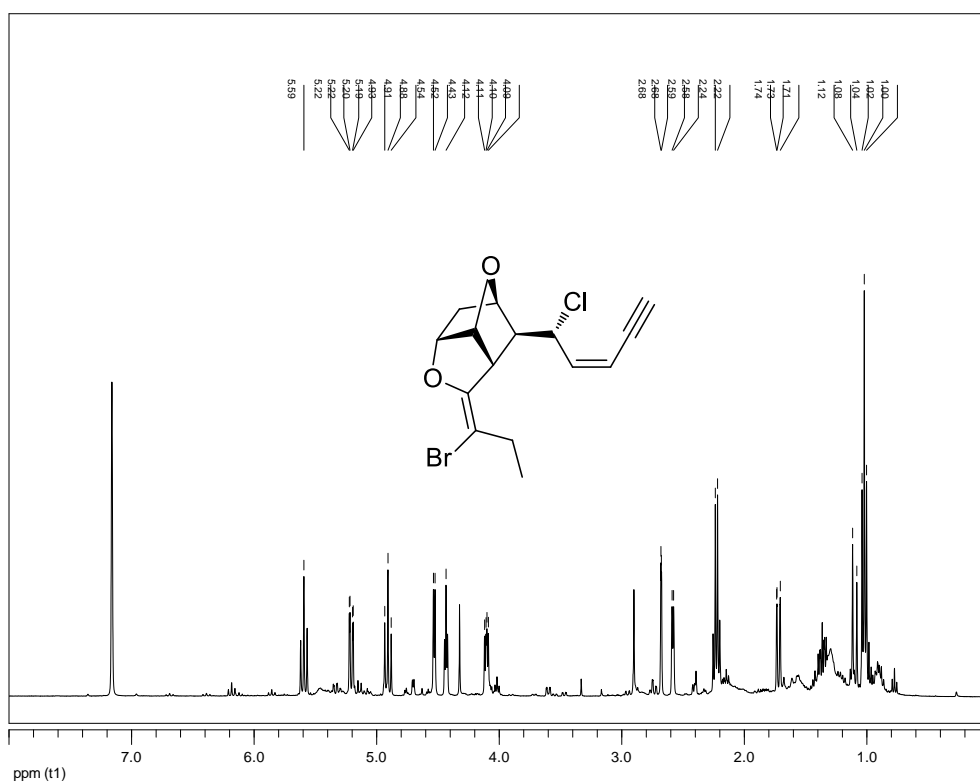

Figure S18. <sup>1</sup>H NMR spectrum (CDCl<sub>3</sub>) of compound 4.

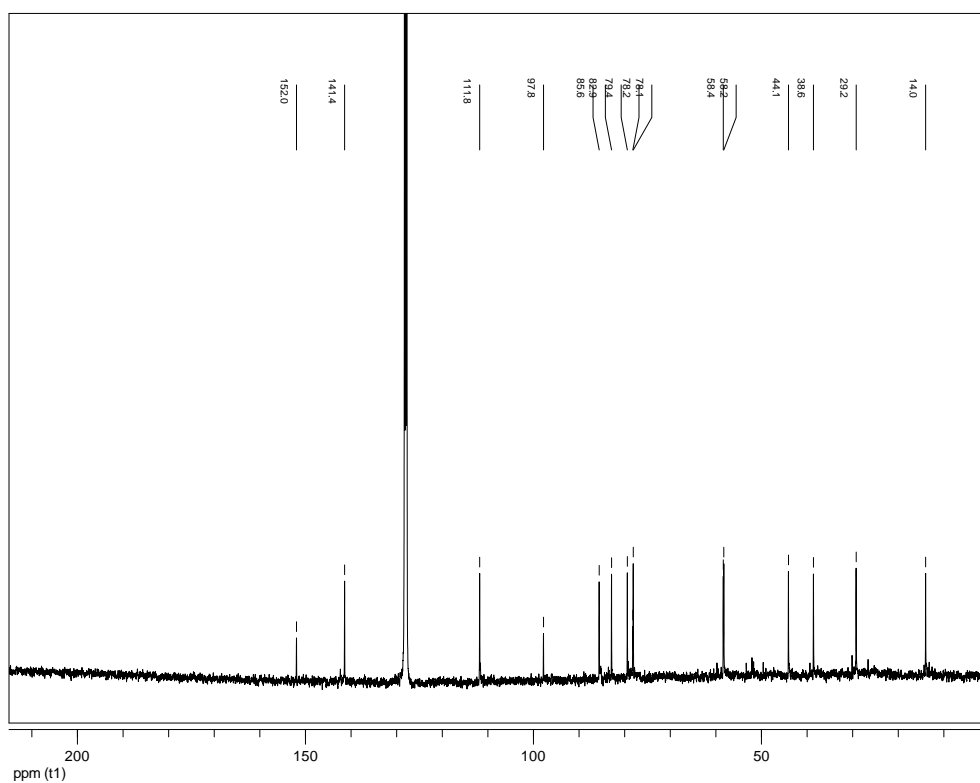

Figure S19. <sup>13</sup>C NMR spectrum (CDCl<sub>3</sub>) of compound 4.



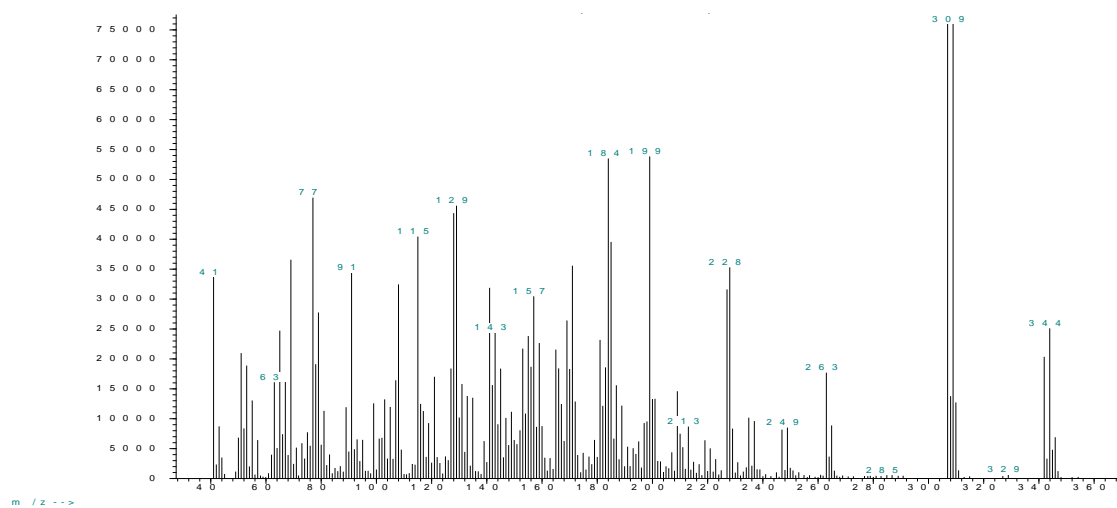

**Figure S20.** Mass spectrum (LR-EIMS) of compound **4**.

$[M]^+$  observed at  $m/z$  342, 344 and 346

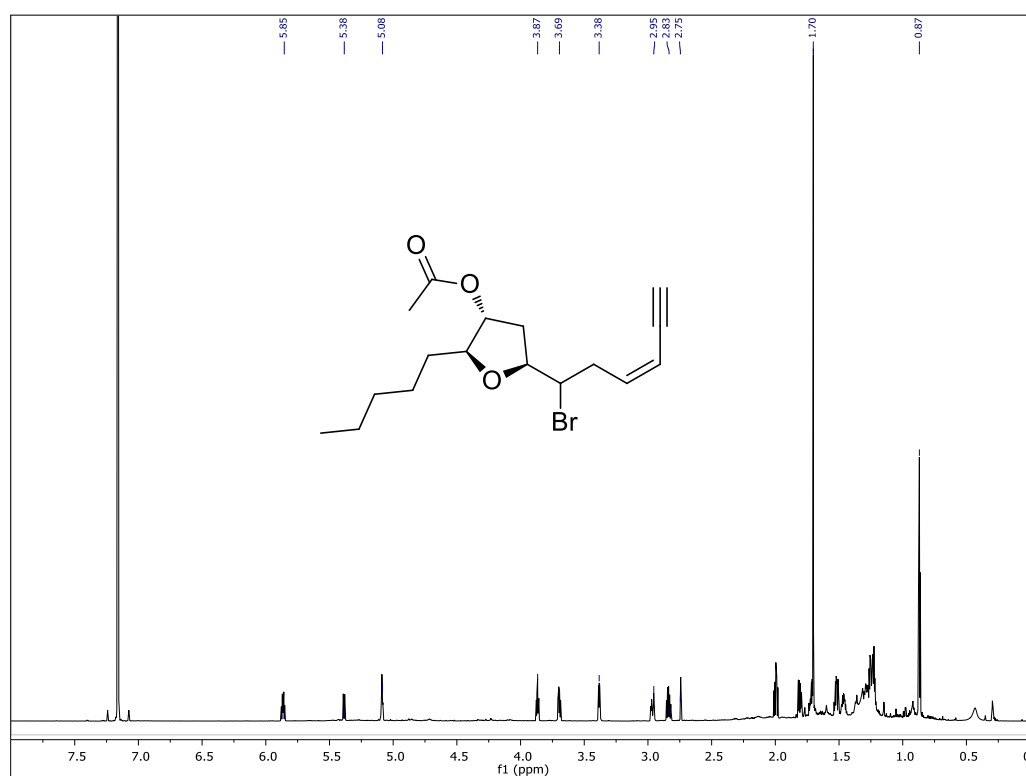

**Figure S21.**  $^1\text{H}$  NMR spectrum ( $\text{C}_6\text{D}_6$ ) of compound 5.

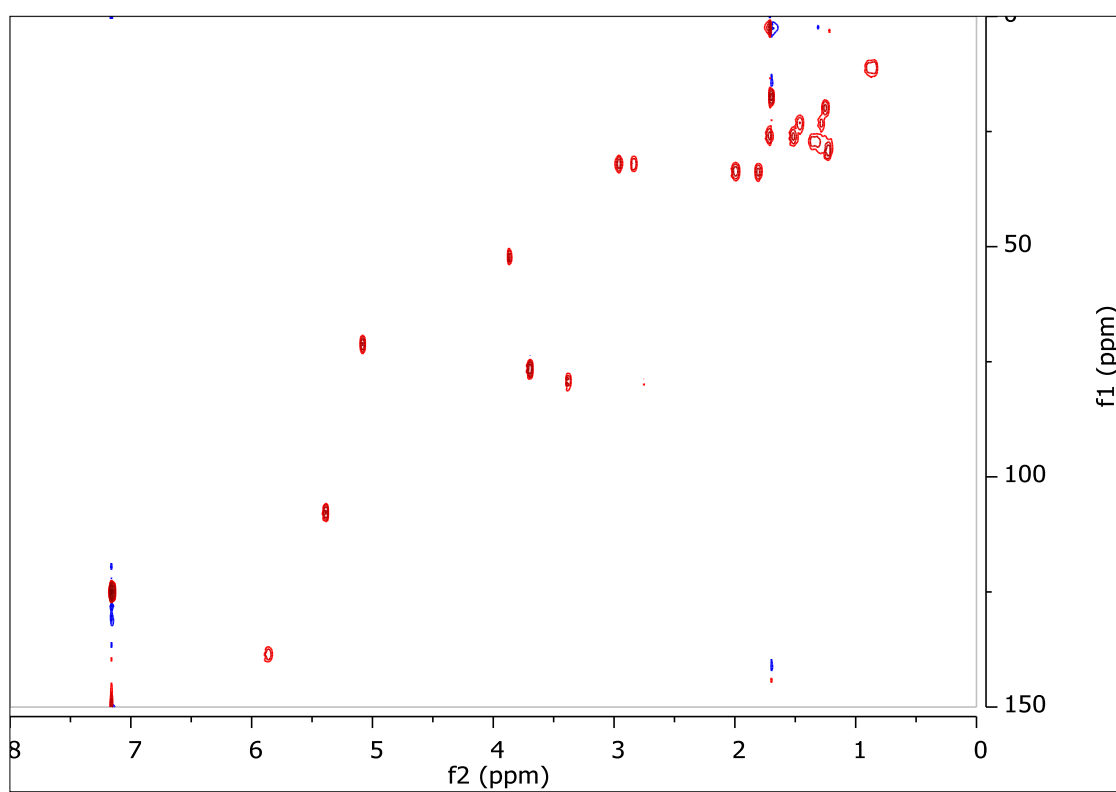

**Figure S22.** HSQC spectrum ( $\text{C}_6\text{D}_6$ ) of compound 5.

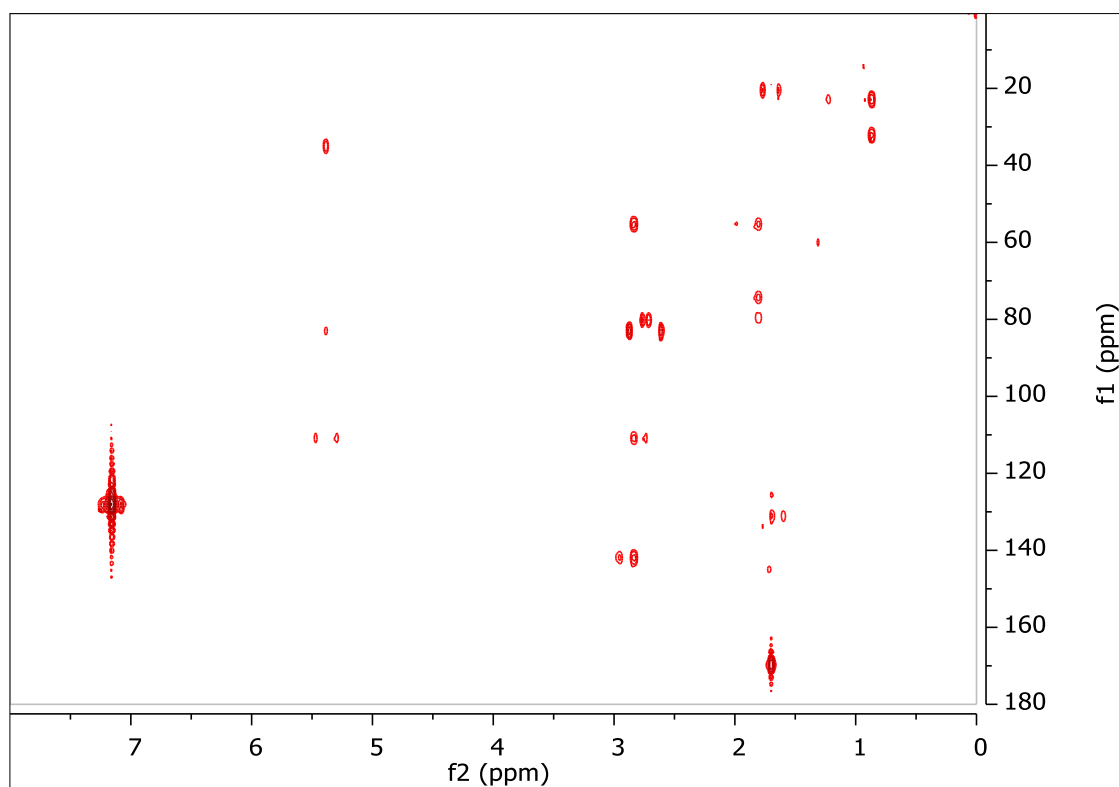

**Figure S23.** HMBC spectrum ( $\text{C}_6\text{D}_6$ ) of compound **5**.

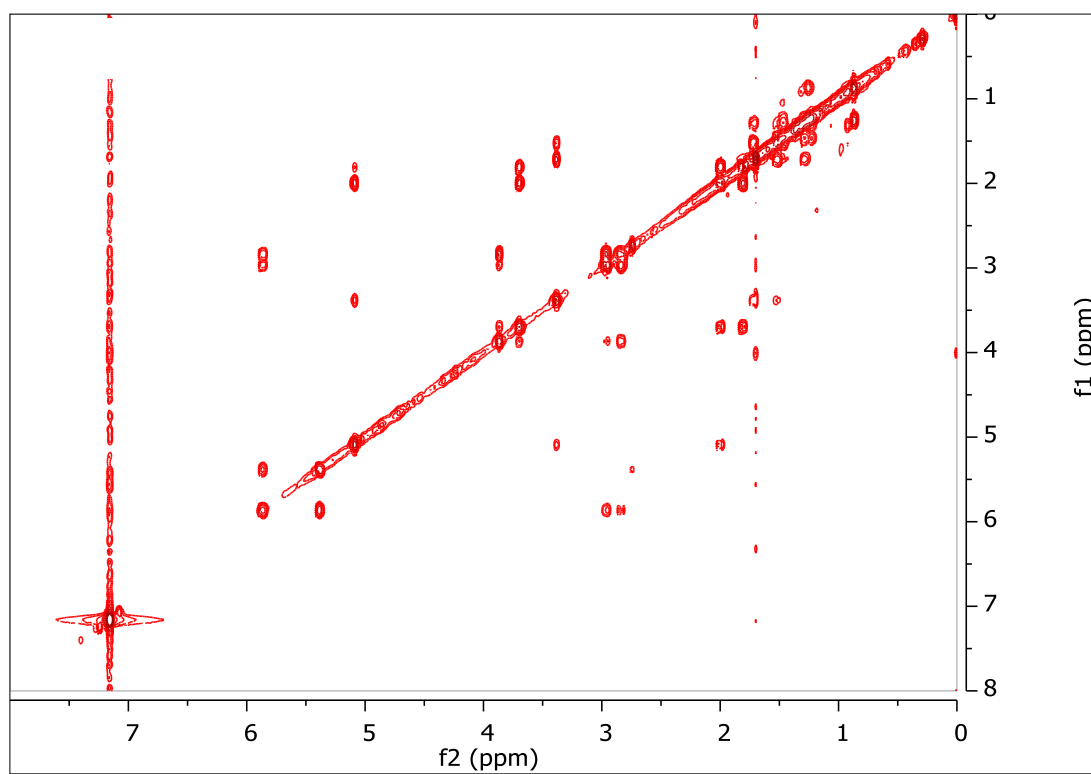

**Figure S24.** COSY spectrum ( $\text{C}_6\text{D}_6$ ) of compound **5**.

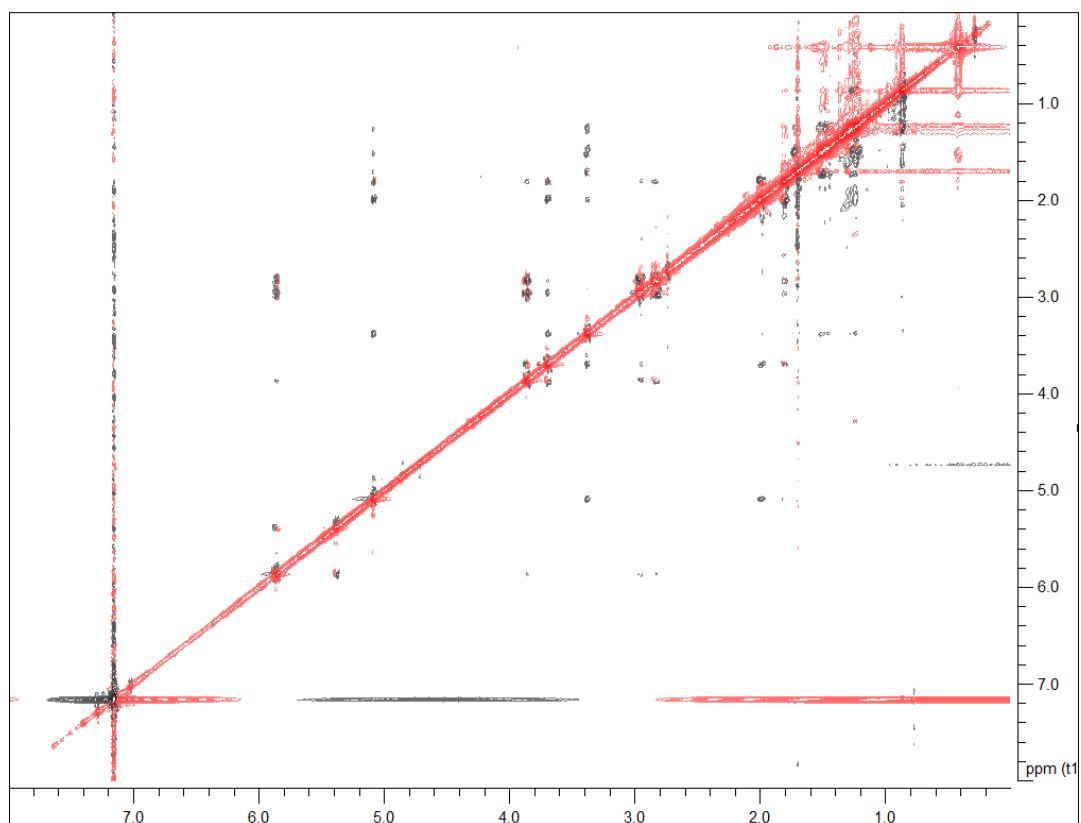

**Figure S25.** NOESY spectrum ( $\text{C}_6\text{D}_6$ ) of compound **5**.

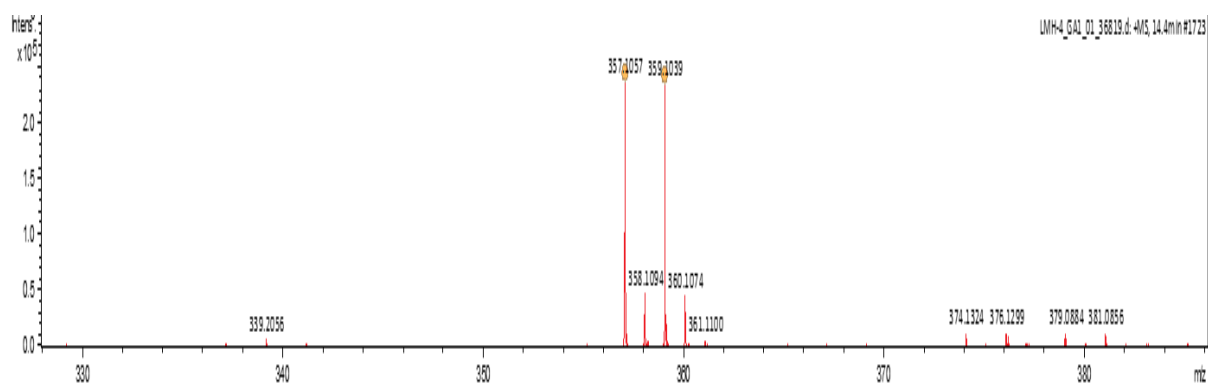

**Figure S26.** Mass spectrum (HR-ESIMS) of compound **5**.

$[\text{M} + \text{H}]^+$  observed at  $m/z$  357.1057, consistent with  $\text{C}_{17}\text{H}_{26}^{79}\text{BrO}_3$

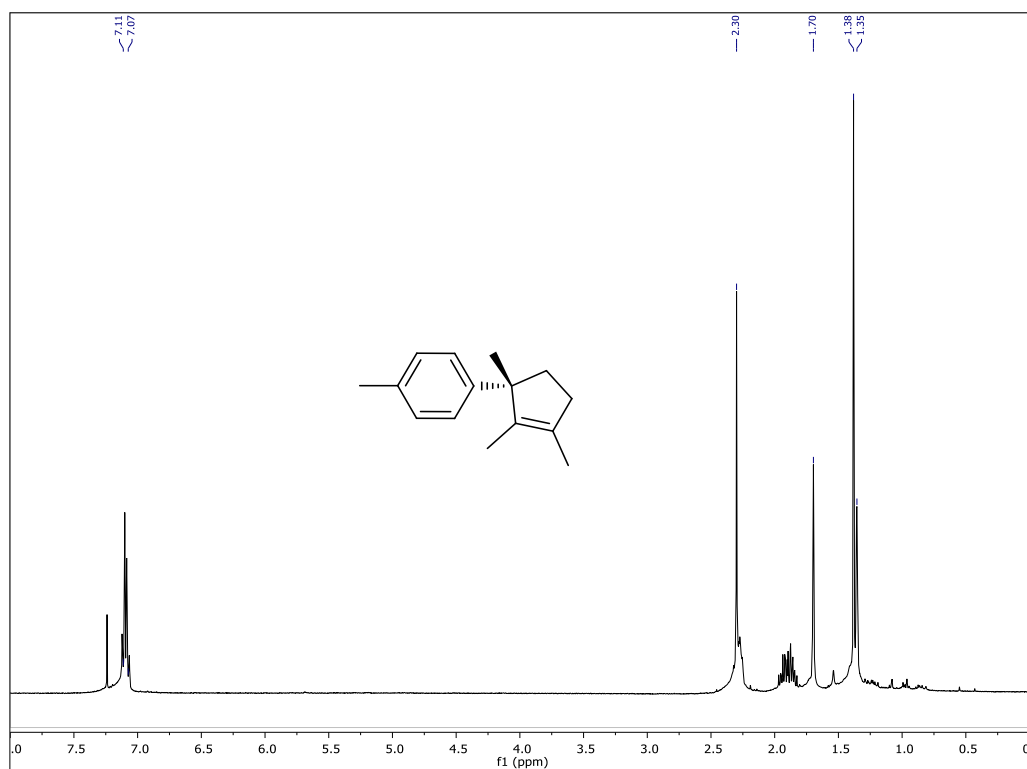

Figure S27. <sup>1</sup>H NMR spectrum (CDCl<sub>3</sub>) of compound 6.

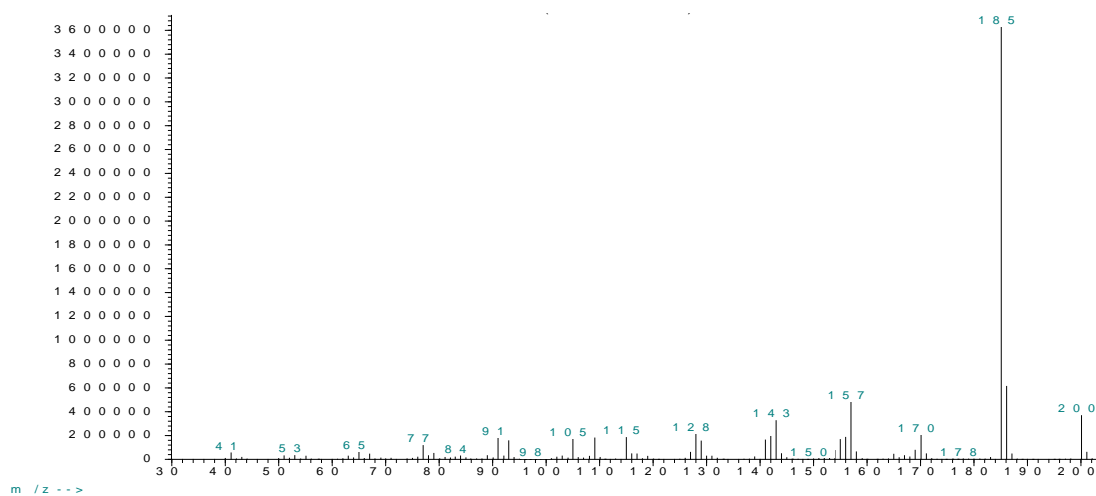

Figure S28. Mass spectrum (LR-EIMS) of compound 6.

[M]<sup>+</sup> observed at *m/z* 200

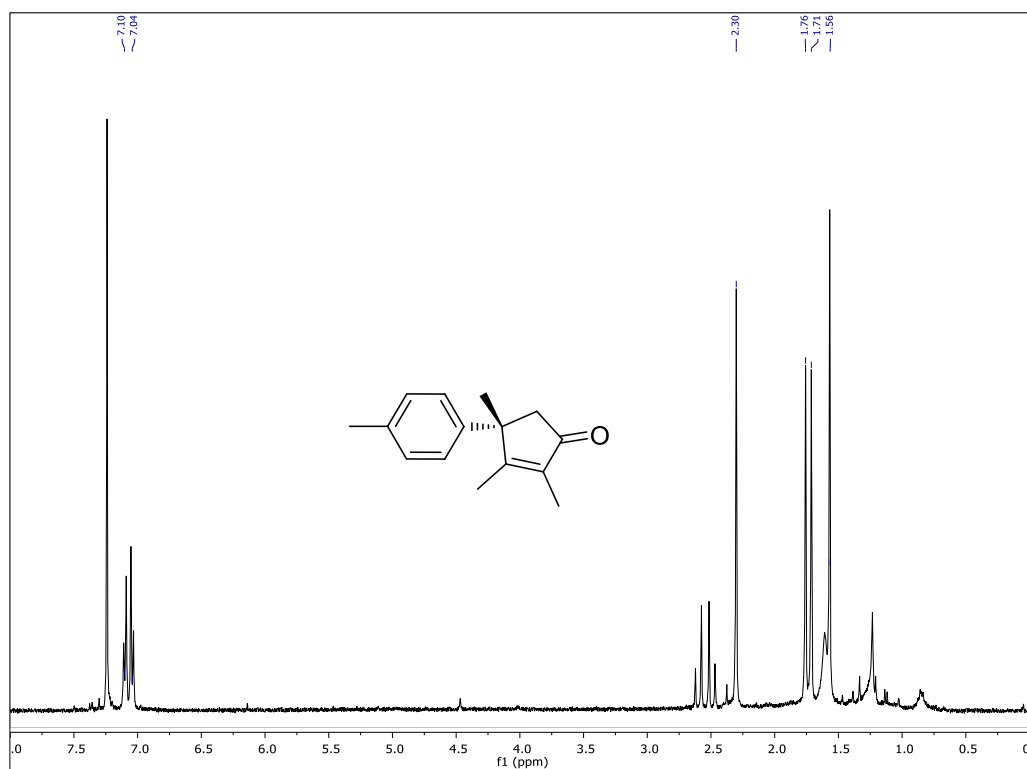

**Figure S29.** <sup>1</sup>H NMR spectrum (CDCl<sub>3</sub>) of compound 7.

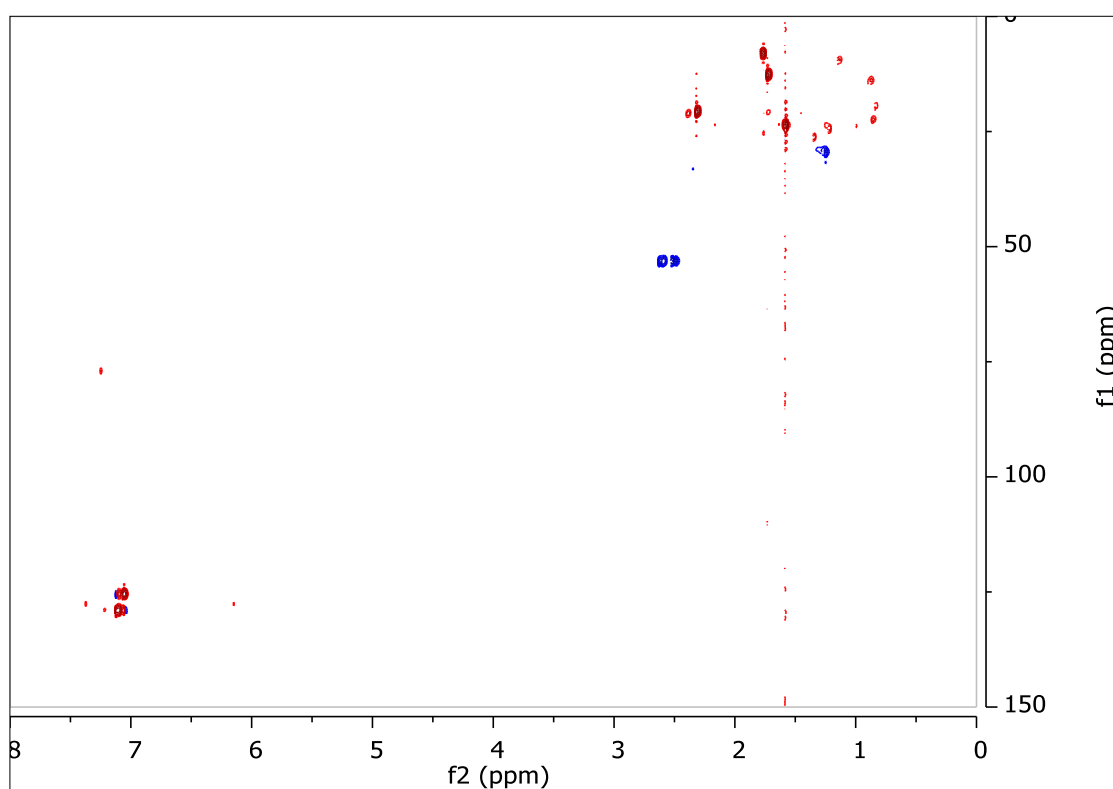

**Figure S30.** HSQC spectrum (CDCl<sub>3</sub>) of compound 7.

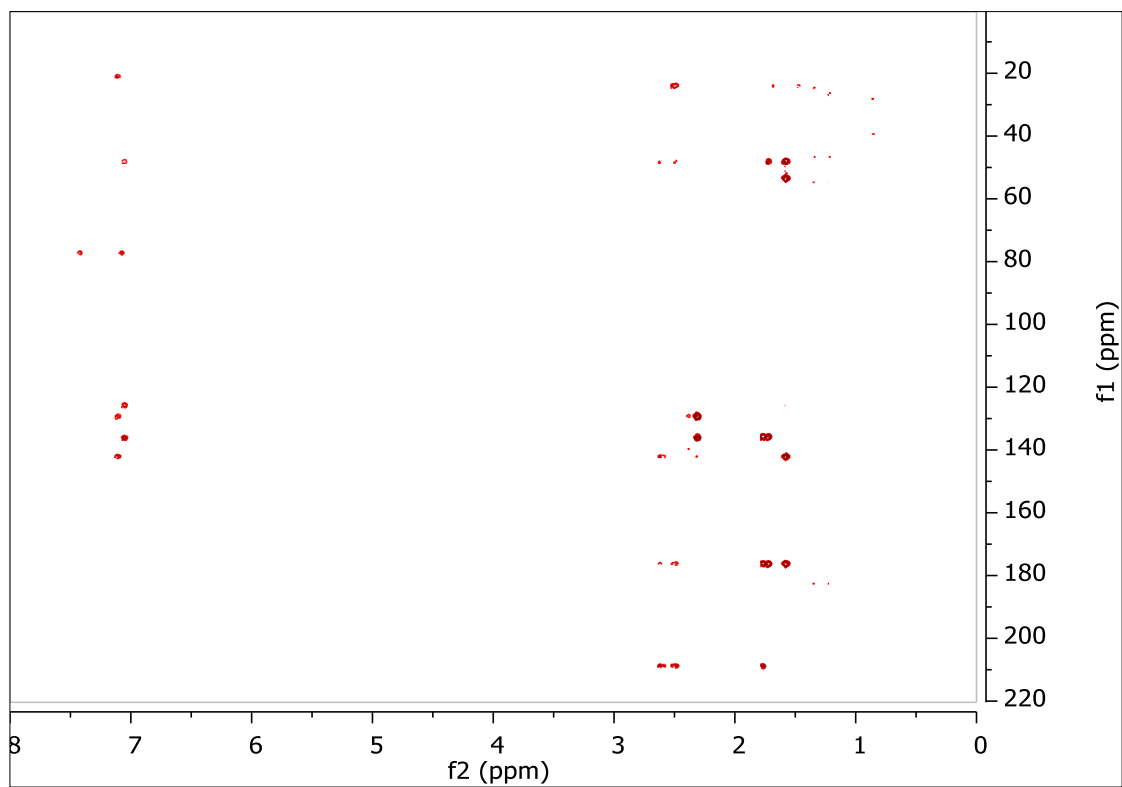

**Figure S31.** HMBC spectrum ( $\text{CDCl}_3$ ) of compound 7.

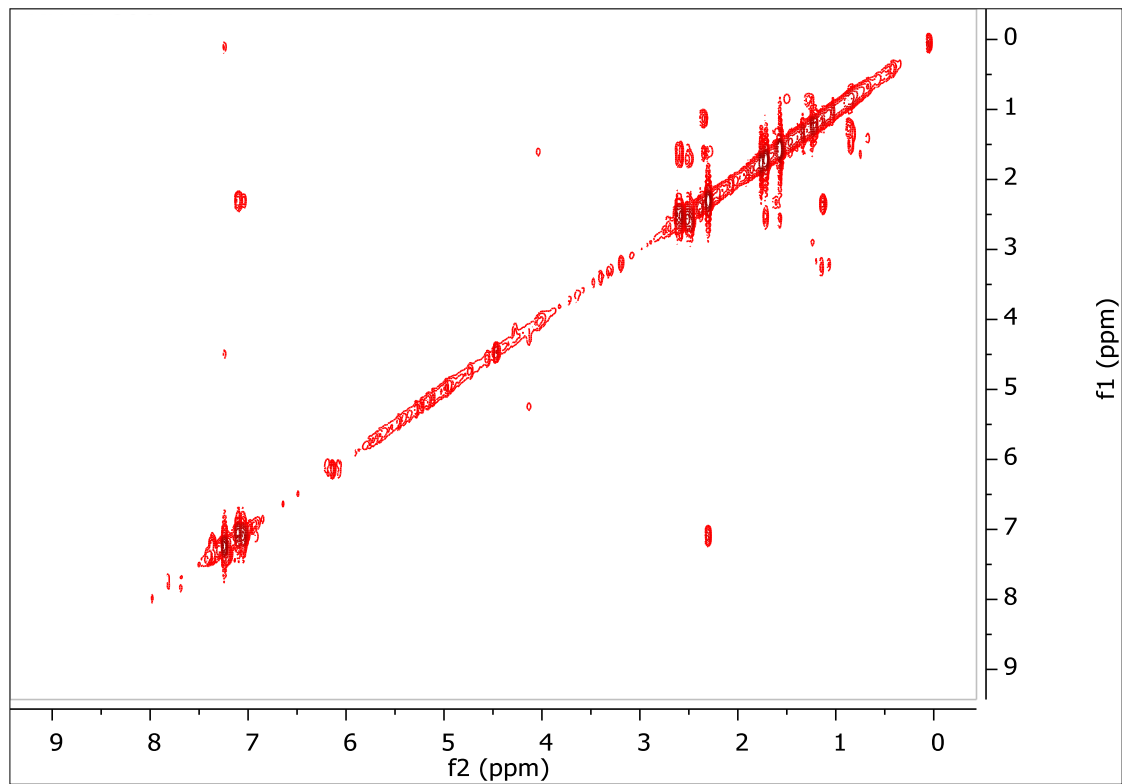

**Figure S32.** COSY spectrum ( $\text{CDCl}_3$ ) of compound 7.

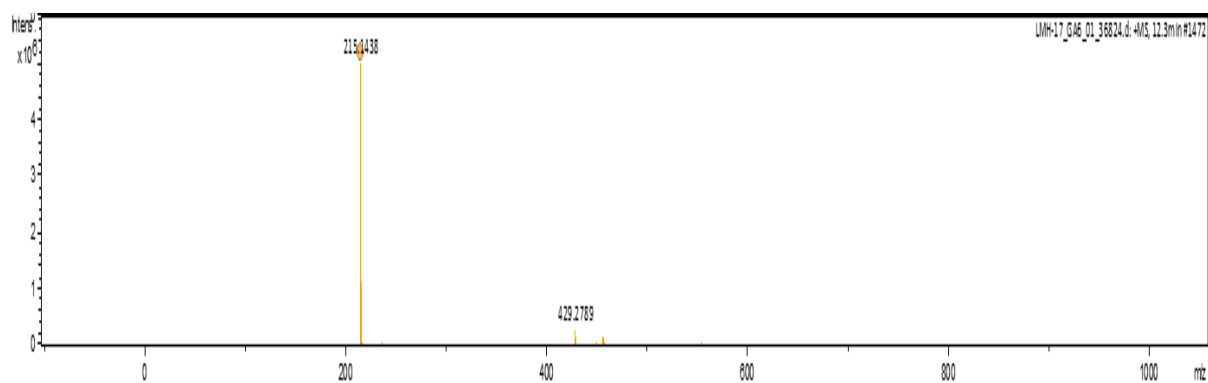

**Figure S33.** Mass spectrum (HR-ESIMS) of compound 7.  
[M + H]<sup>+</sup> observed at  $m/z$  215.1438, consistent with C<sub>15</sub>H<sub>19</sub>O



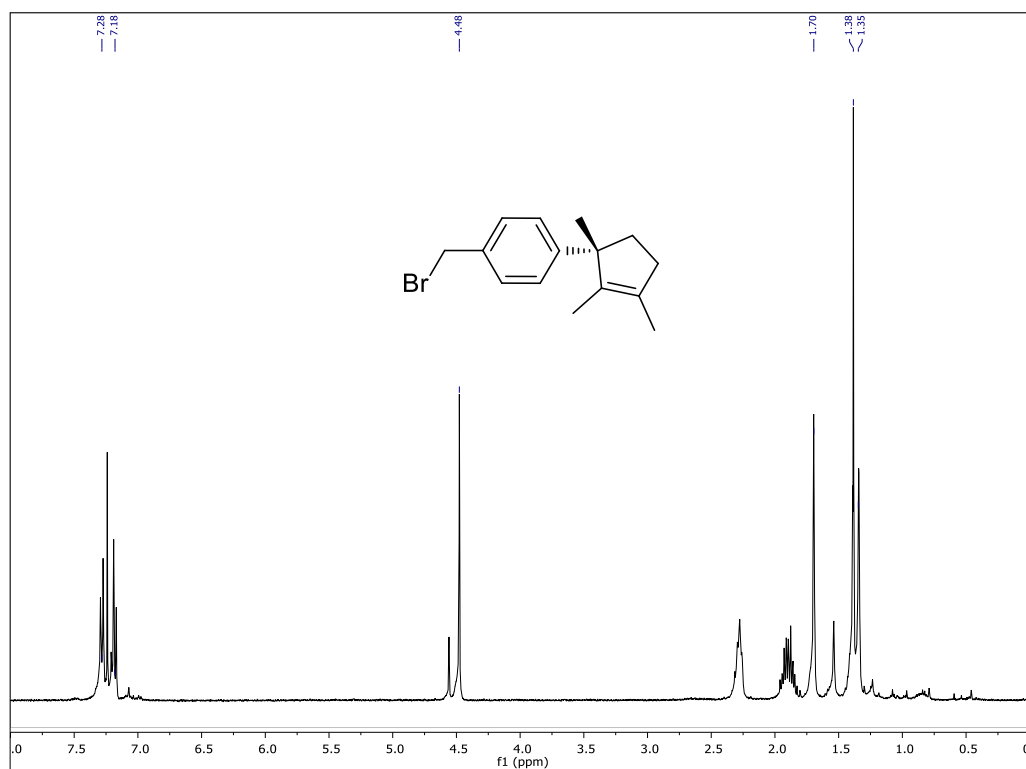

**Figure S34.** <sup>1</sup>H NMR spectrum (CDCl<sub>3</sub>) of compound 8.

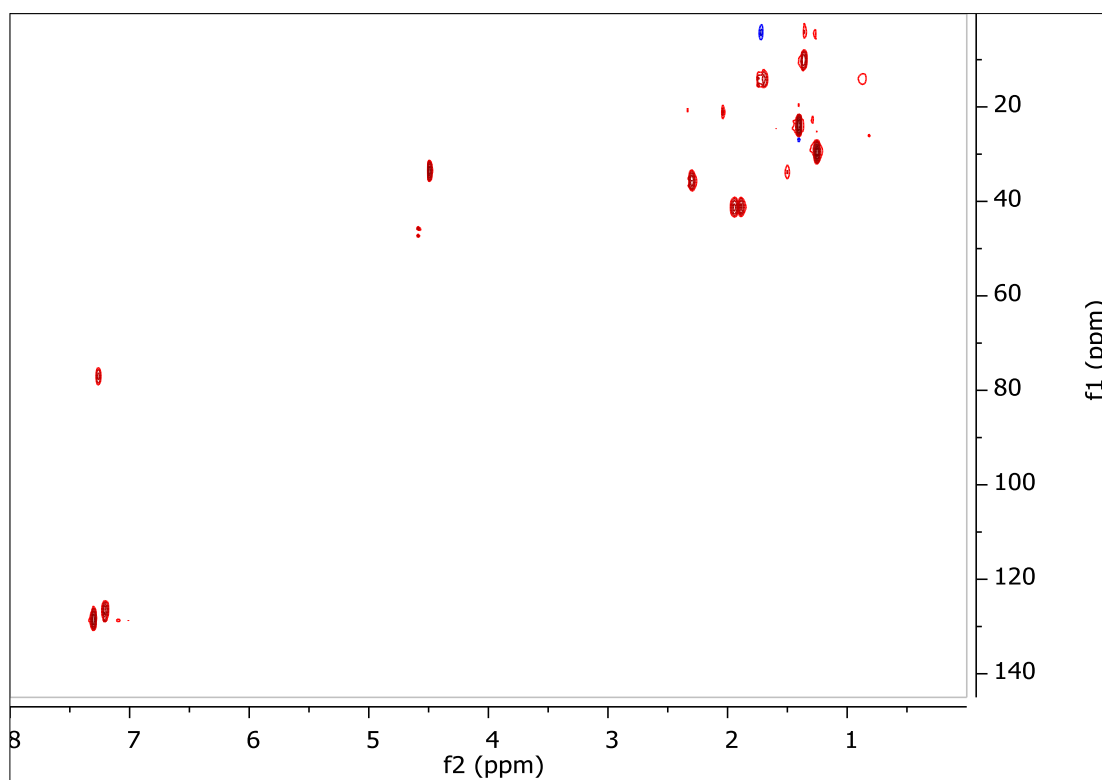

**Figure S35.** HSQC spectrum (CDCl<sub>3</sub>) of compound 8.

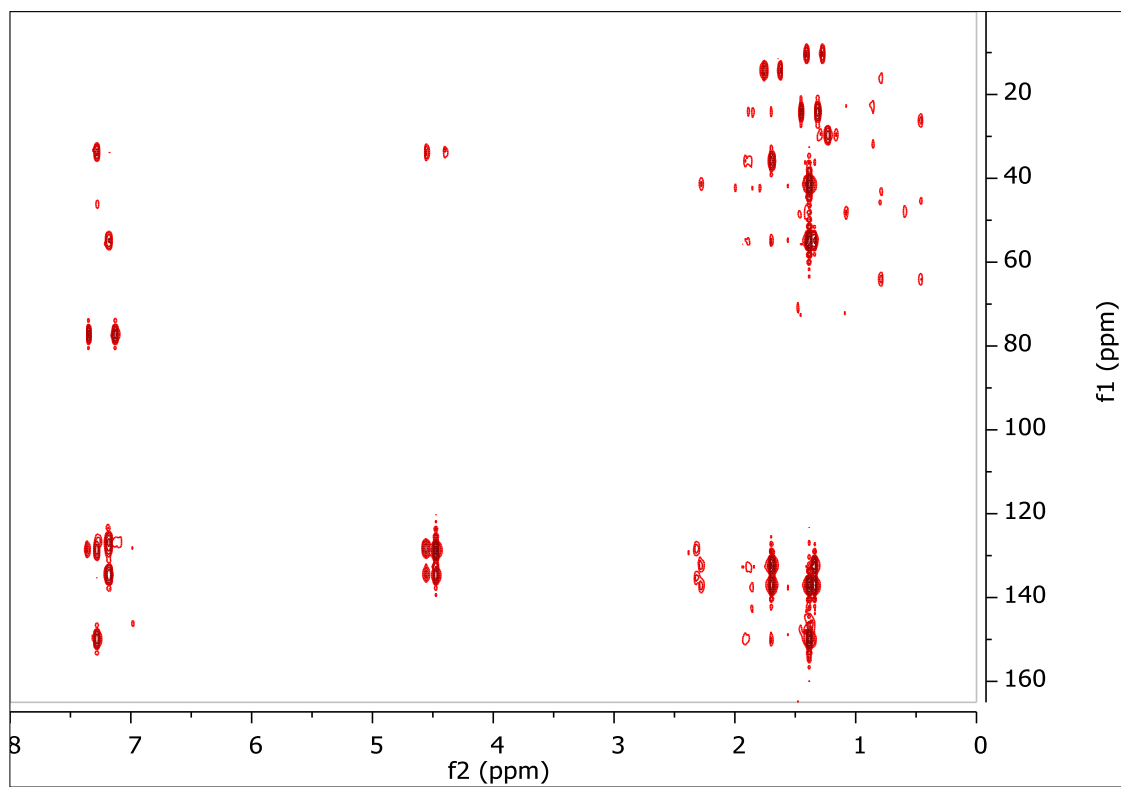

**Figure S36.** HMBC spectrum ( $\text{CDCl}_3$ ) of compound **8**.

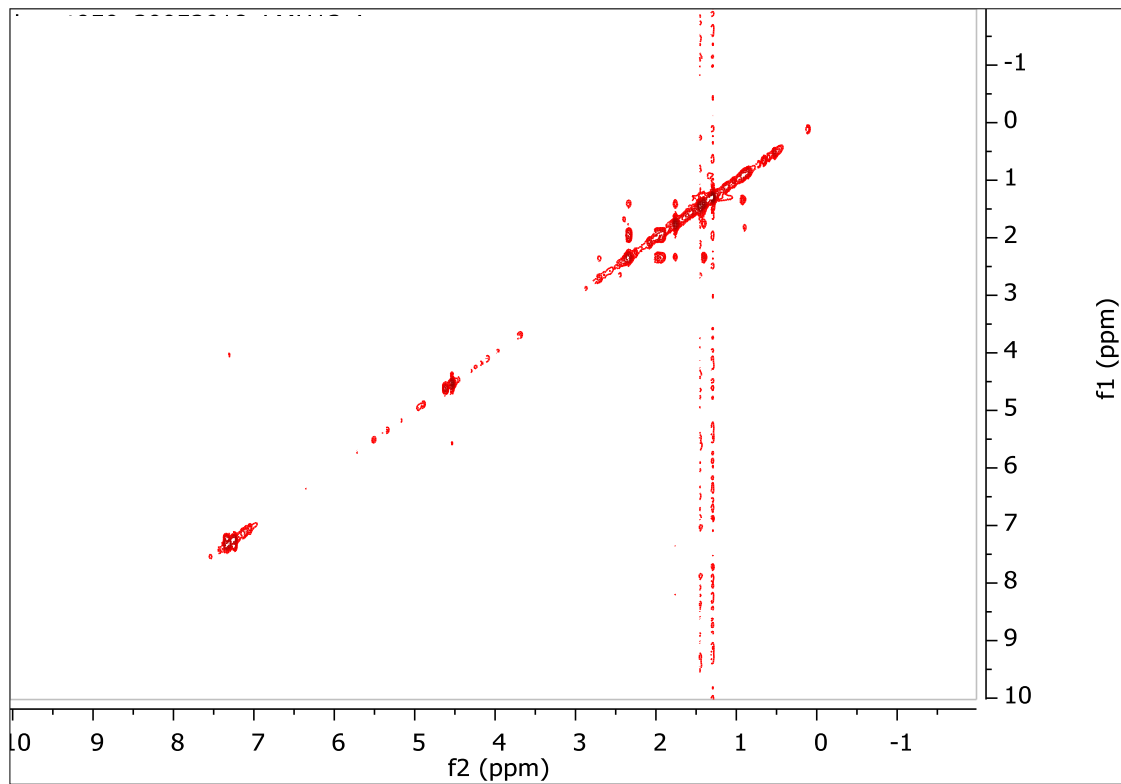

**Figure S37.** COSY spectrum ( $\text{CDCl}_3$ ) of compound **8**.

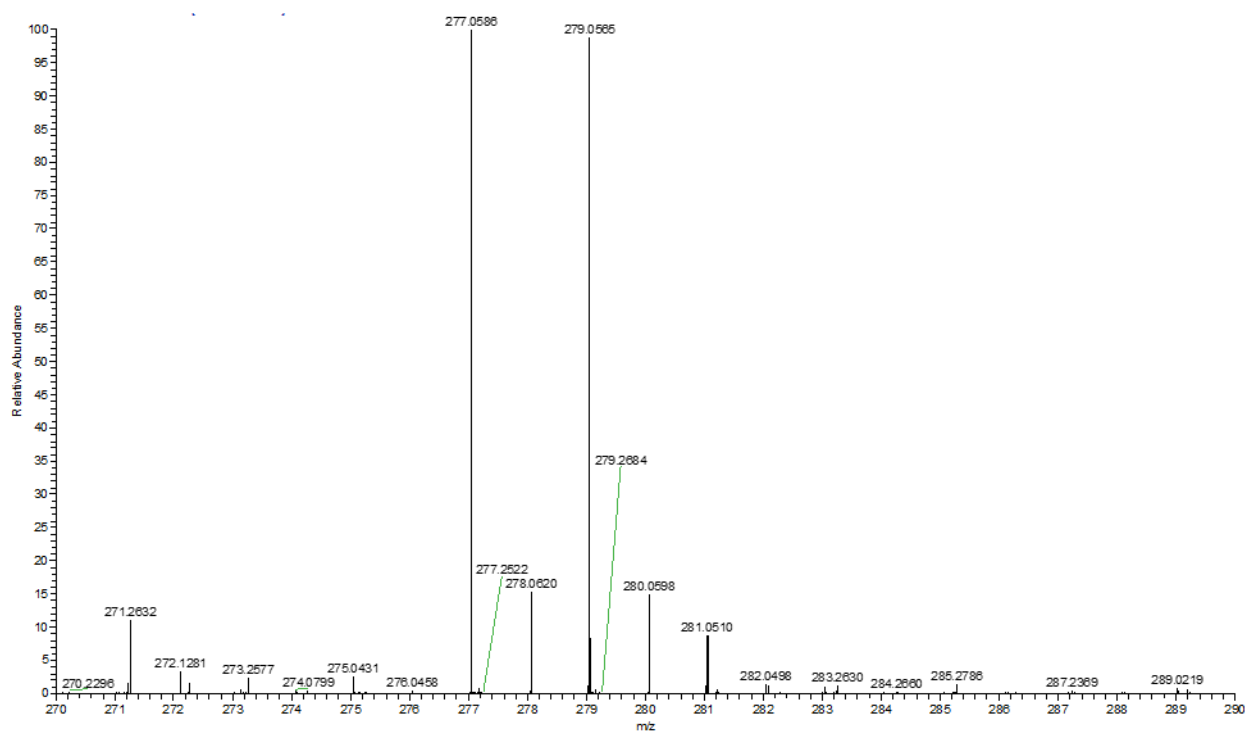

**Figure S38.** Mass spectrum (HR-APCIMS) of compound 8.

$[M - H]^-$  observed at  $m/z$  277.0586, consistent with  $C_{15}H_{18}^{79}Br$

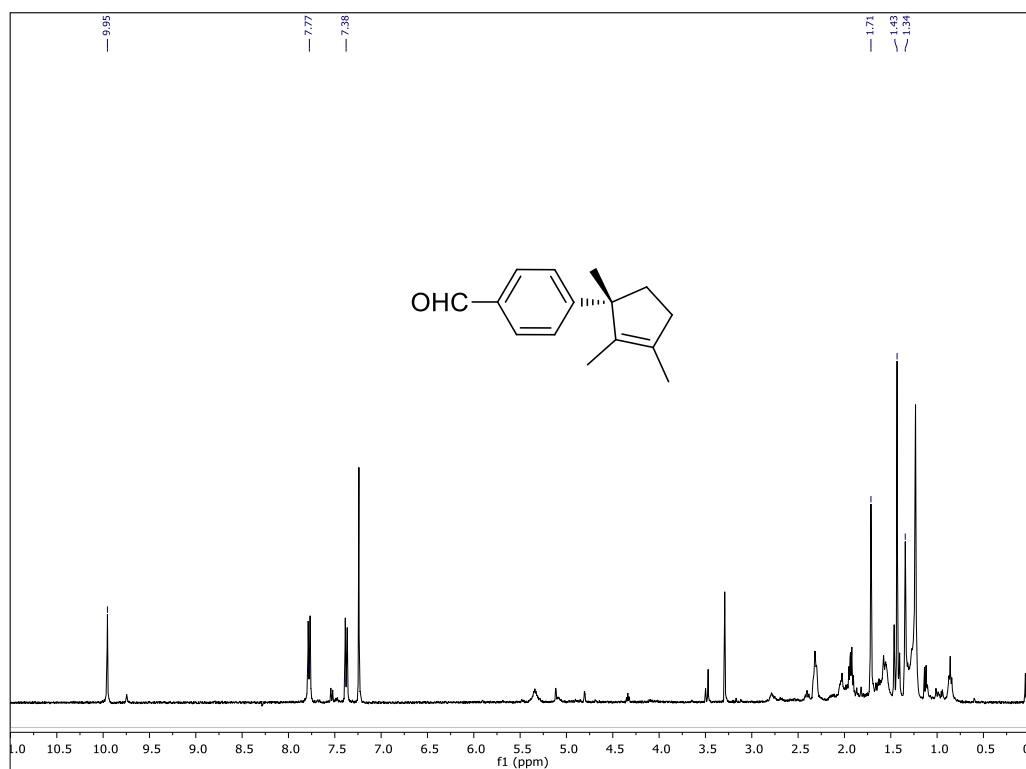

Figure S39. <sup>1</sup>H NMR spectrum (CDCl<sub>3</sub>) of compound 9.

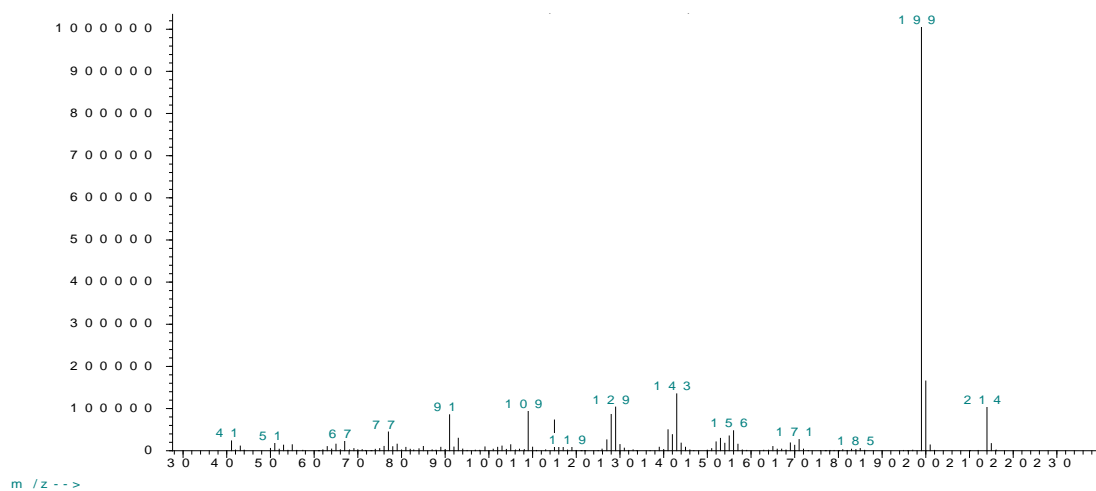

Figure S40. Mass spectrum (LR-EIMS) of compound 9.

[M]<sup>+</sup> observed at *m/z* 214

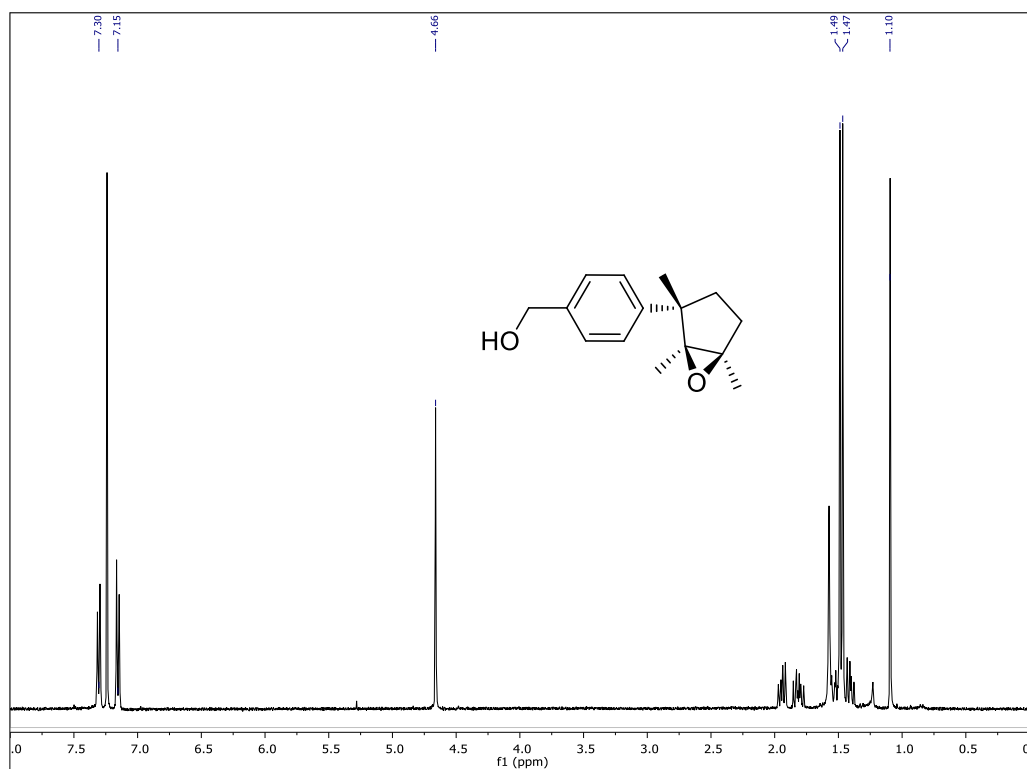

**Figure S41.** <sup>1</sup>H NMR spectrum (CDCl<sub>3</sub>) of compound 10.

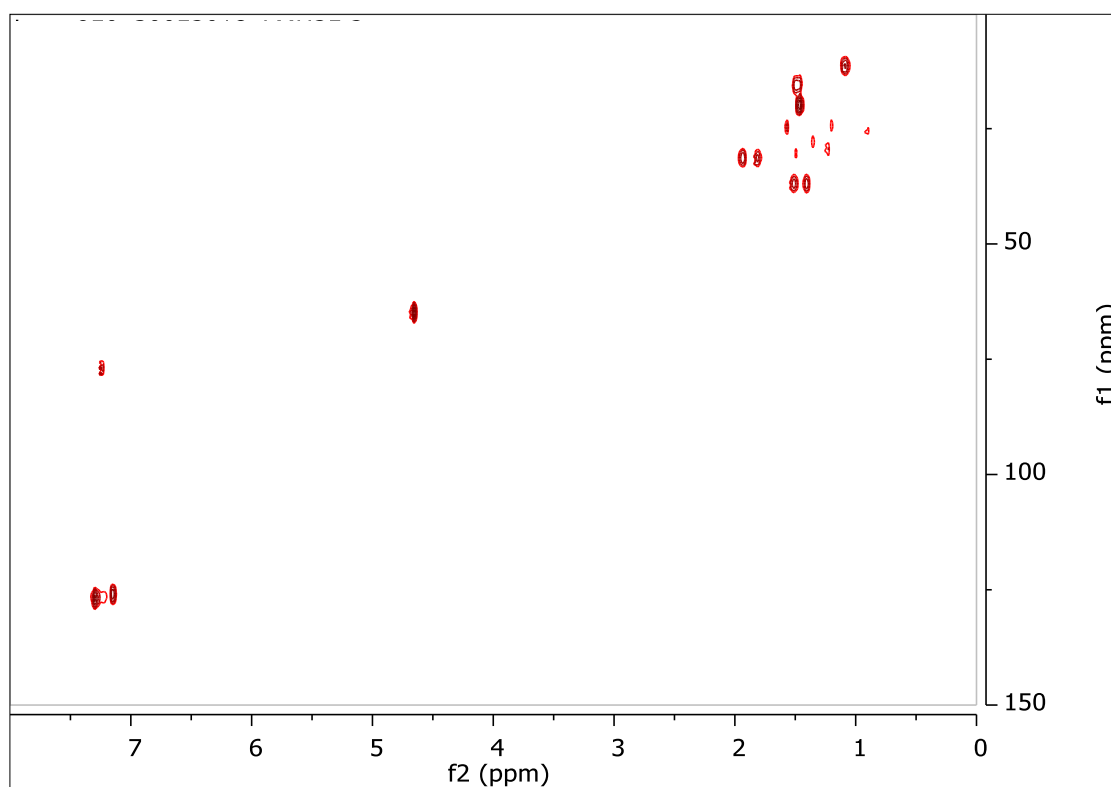

**Figure S42.** HSQC spectrum (CDCl<sub>3</sub>) of compound 10.

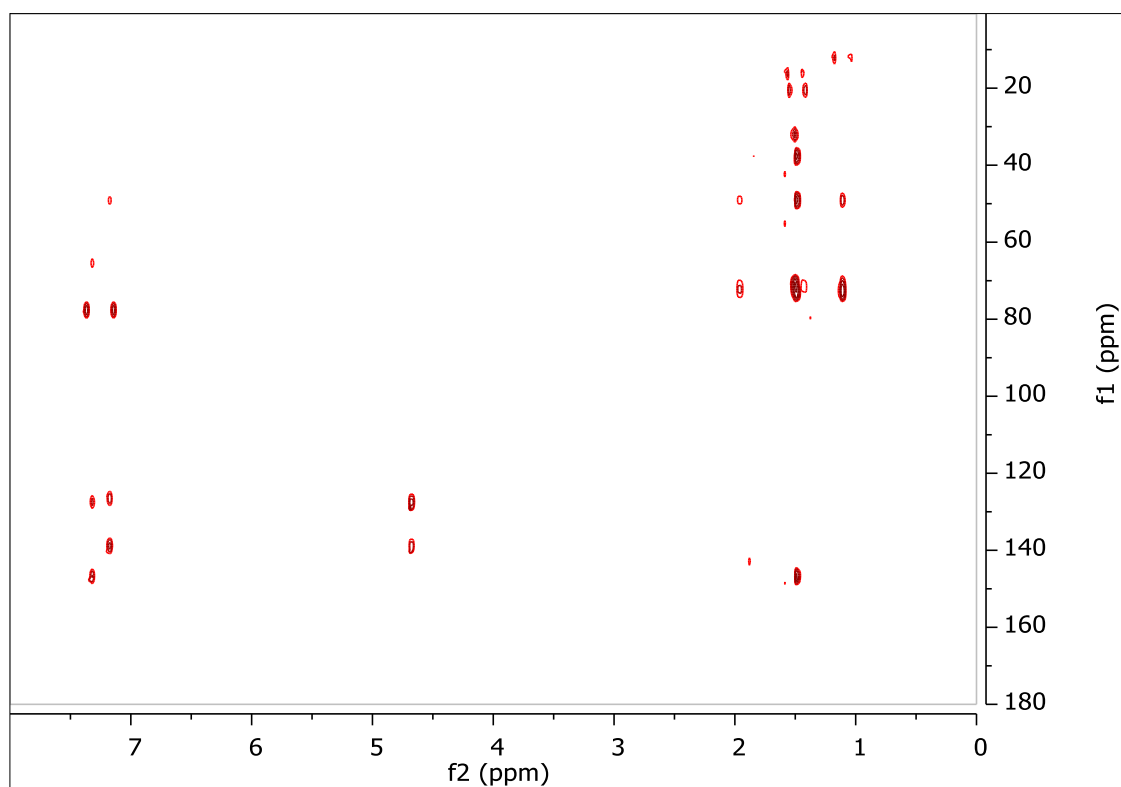

**Figure S43.** HMBC spectrum (CDCl<sub>3</sub>) of compound 10.

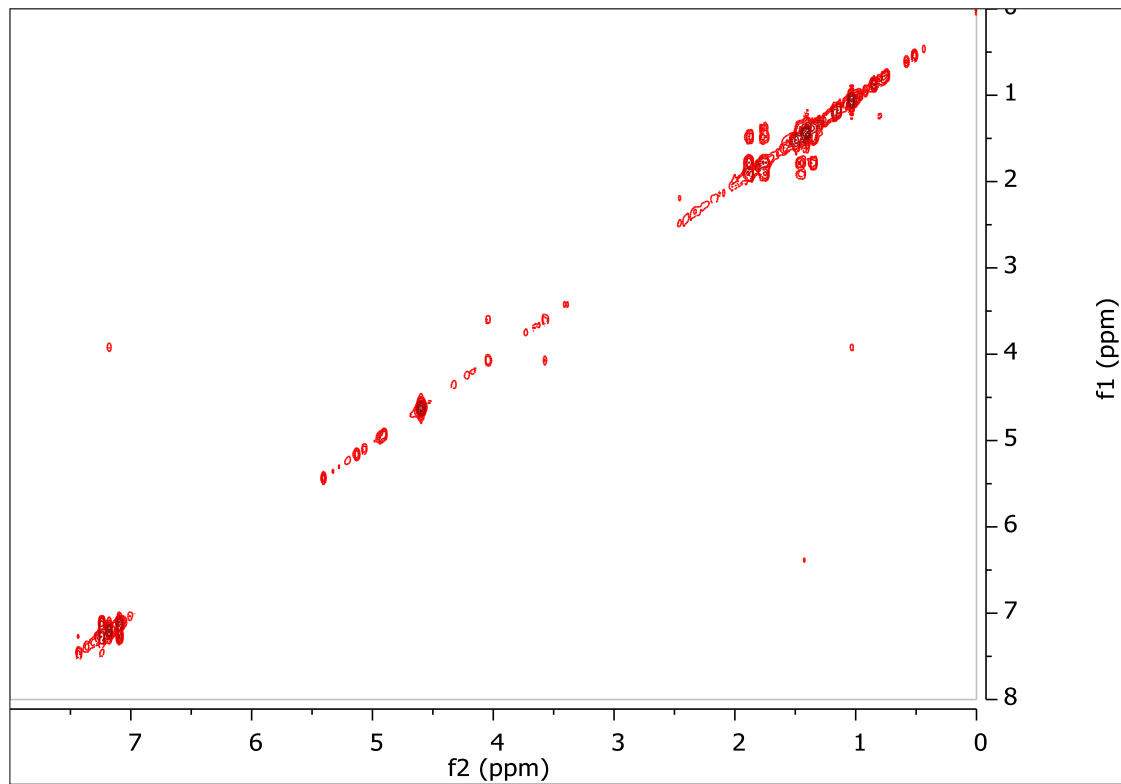

**Figure S44.** COSY spectrum (CDCl<sub>3</sub>) of compound 10.

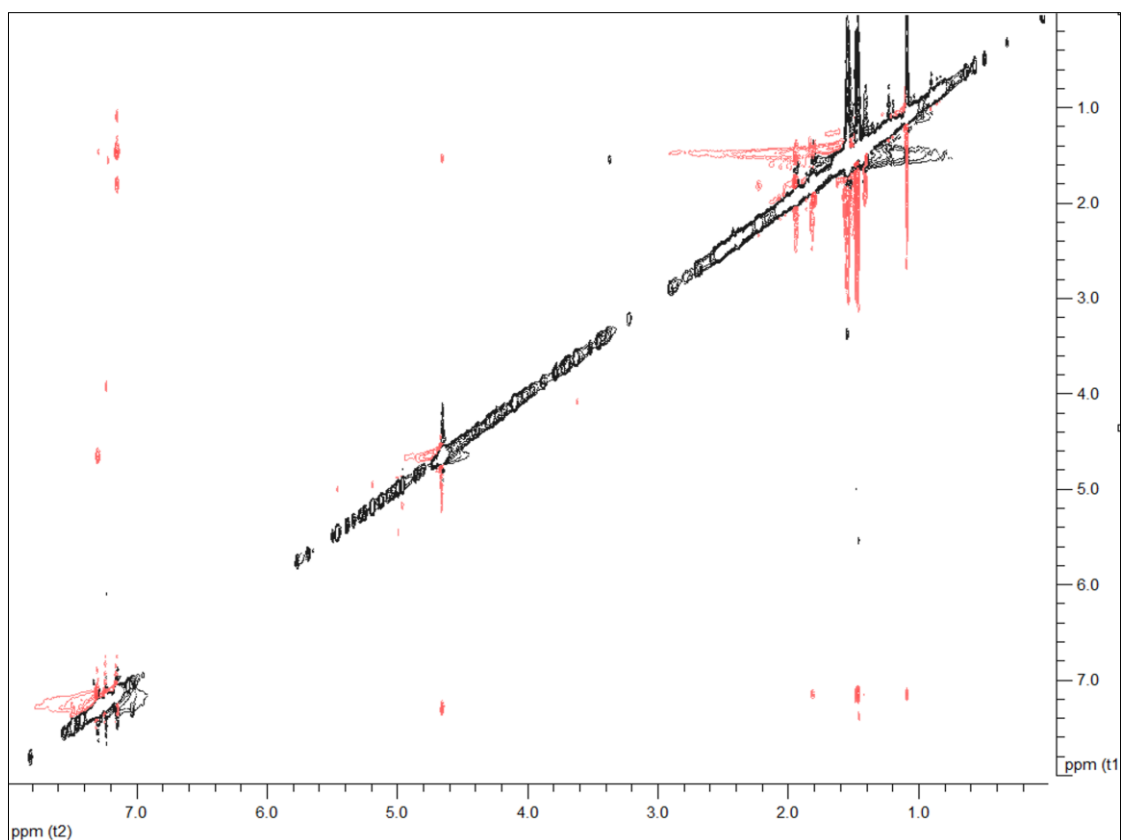

**Figure S45.** NOESY spectrum (CDCl<sub>3</sub>) of compound **10**.

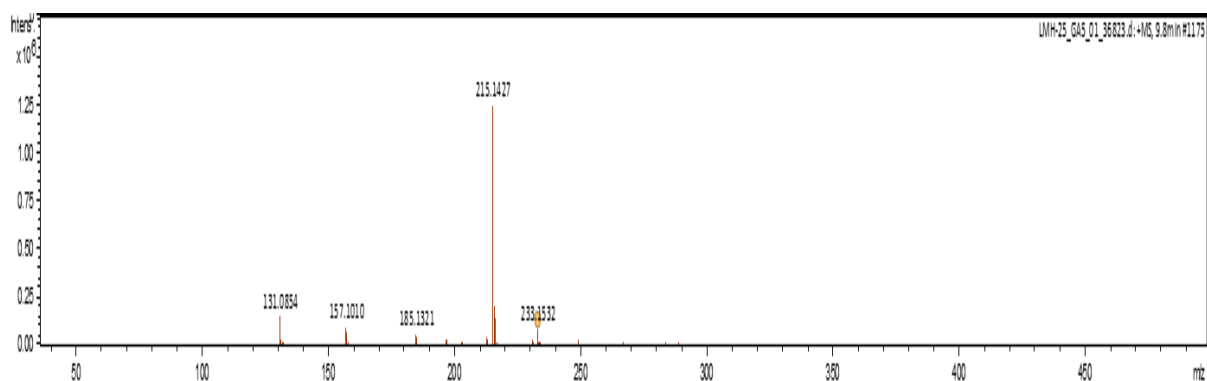

**Figure S46.** Mass spectrum (HR-ESIMS) of compound **10**.

[M + H]<sup>+</sup> observed at  $m/z$  233.1532, consistent with C<sub>15</sub>H<sub>21</sub>O<sub>2</sub>

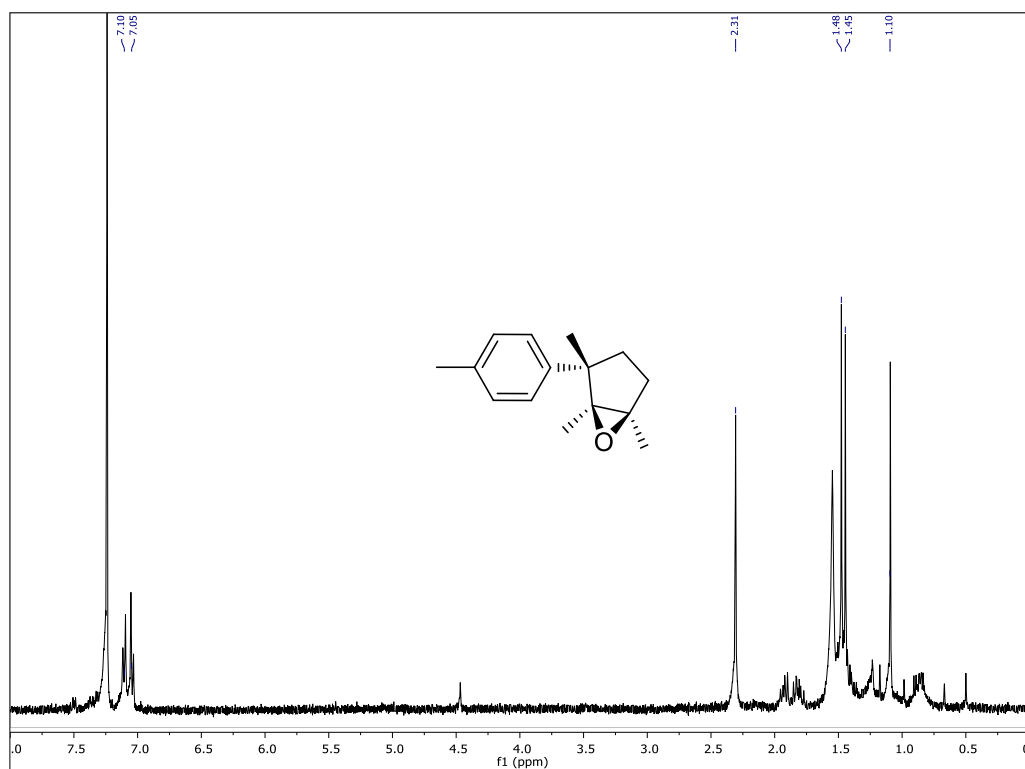

Figure S47.  $^1\text{H}$  NMR spectrum ( $\text{CDCl}_3$ ) of compound **11**.

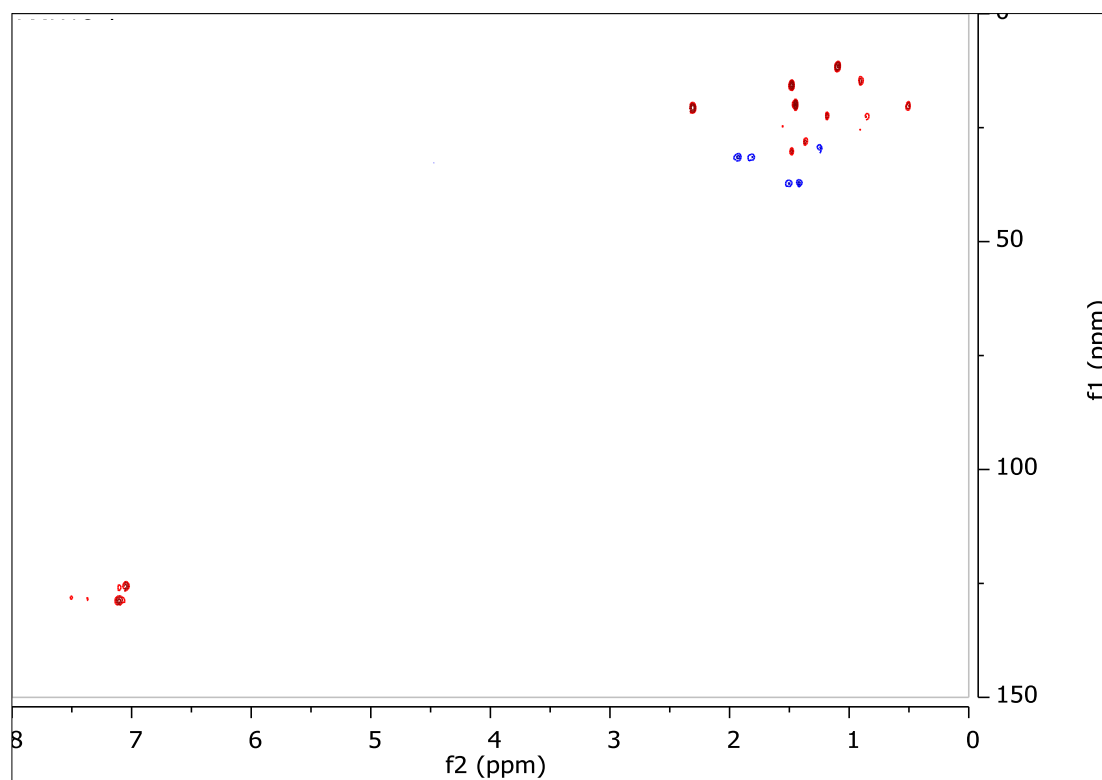

Figure S48. HSQC spectrum ( $\text{CDCl}_3$ ) of compound **11**.



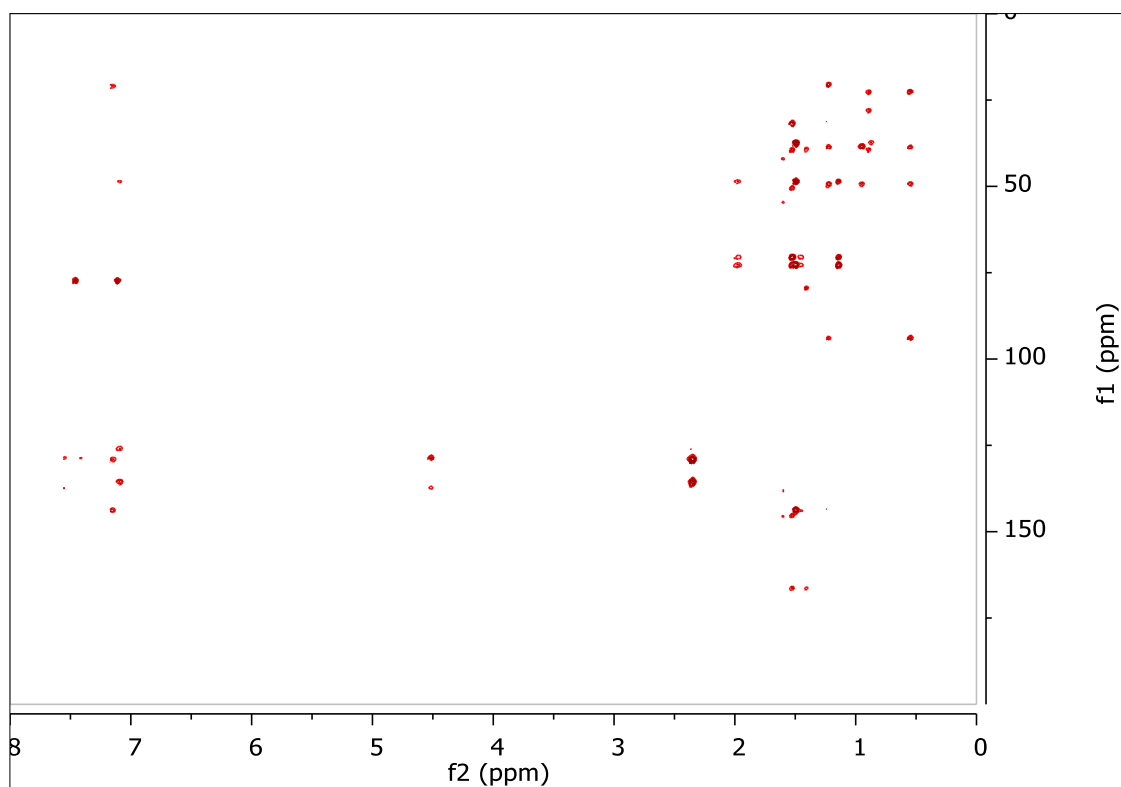

**Figure S49.** HMBC spectrum ( $\text{CDCl}_3$ ) of compound **11**.

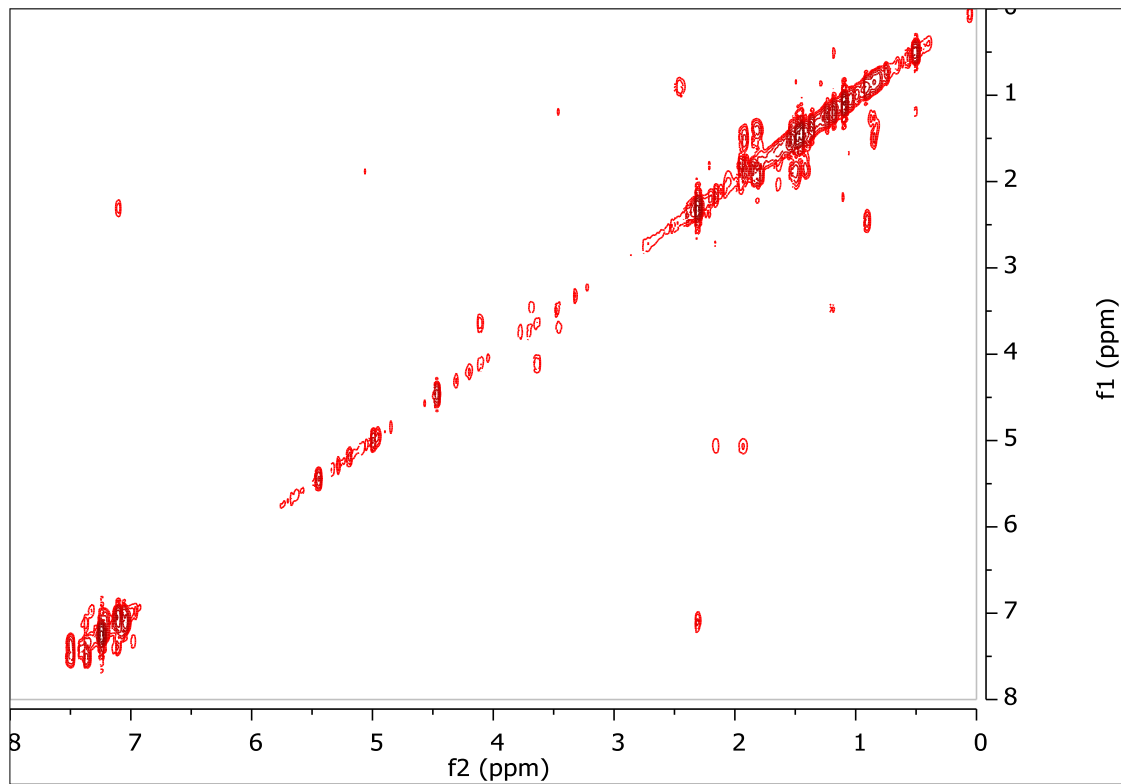

**Figure S50.** COSY spectrum ( $\text{CDCl}_3$ ) of compound **11**.

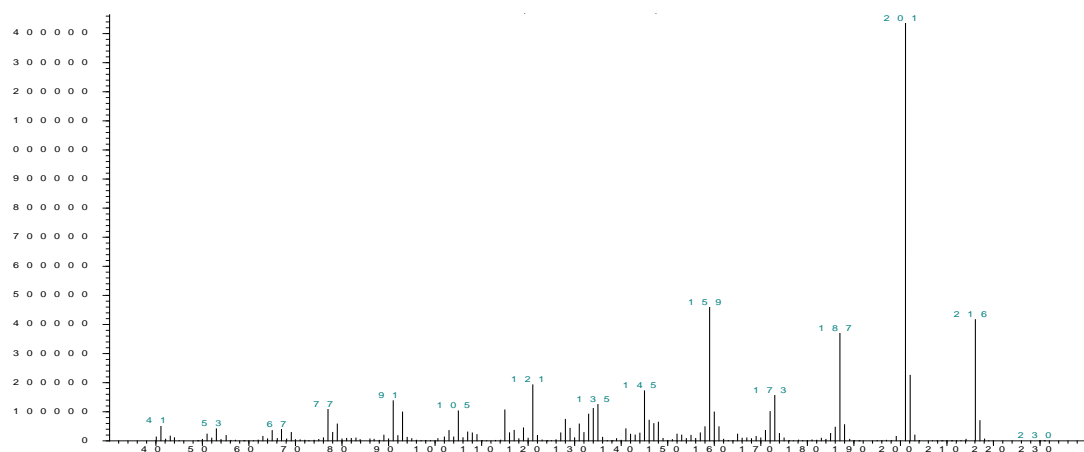

**Figure S51.** Mass spectrum (LR-EIMS) of compound **11**.

$[M]^+$  observed at  $m/z$  216

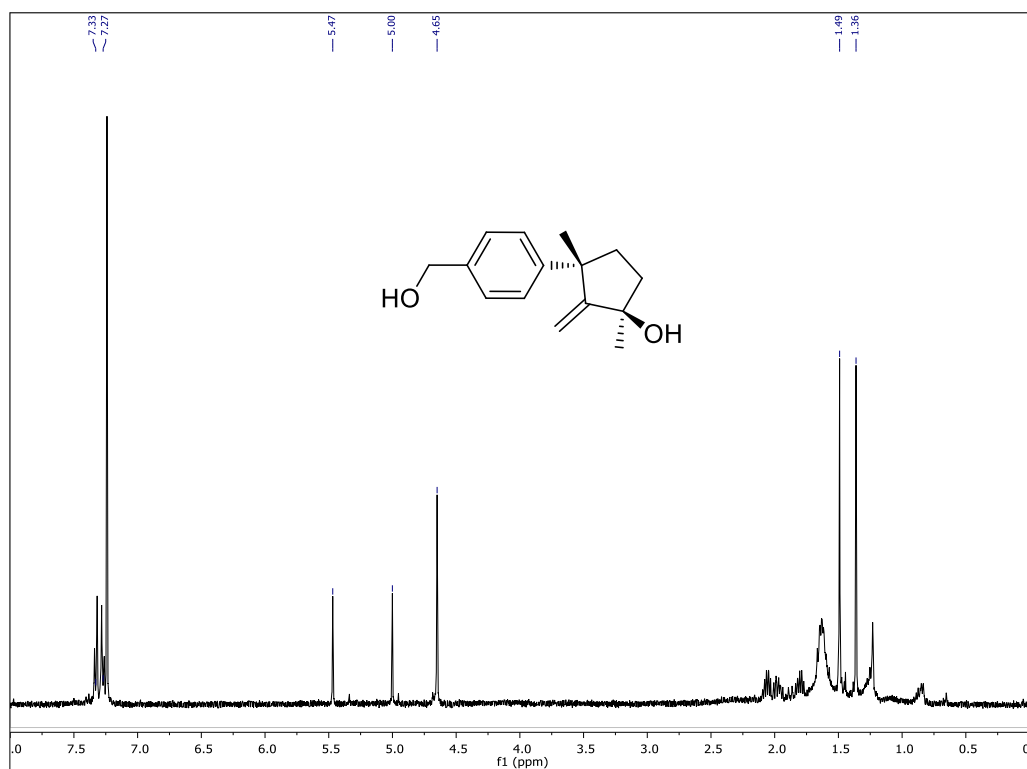

Figure S52. <sup>1</sup>H NMR spectrum (CDCl<sub>3</sub>) of compound 12.

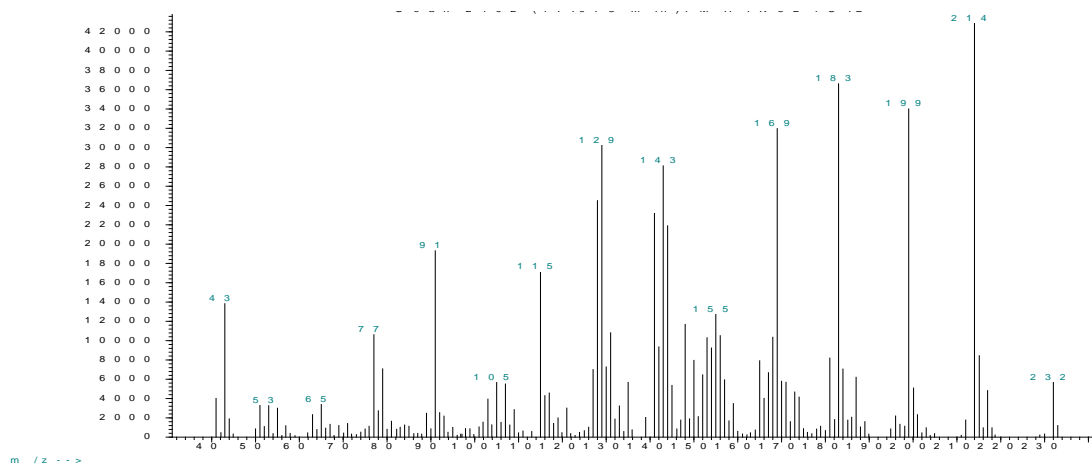

Figure S53. Mass spectrum (LR-EIMS) of compound 12.

[M]<sup>+</sup> observed at m/z 232

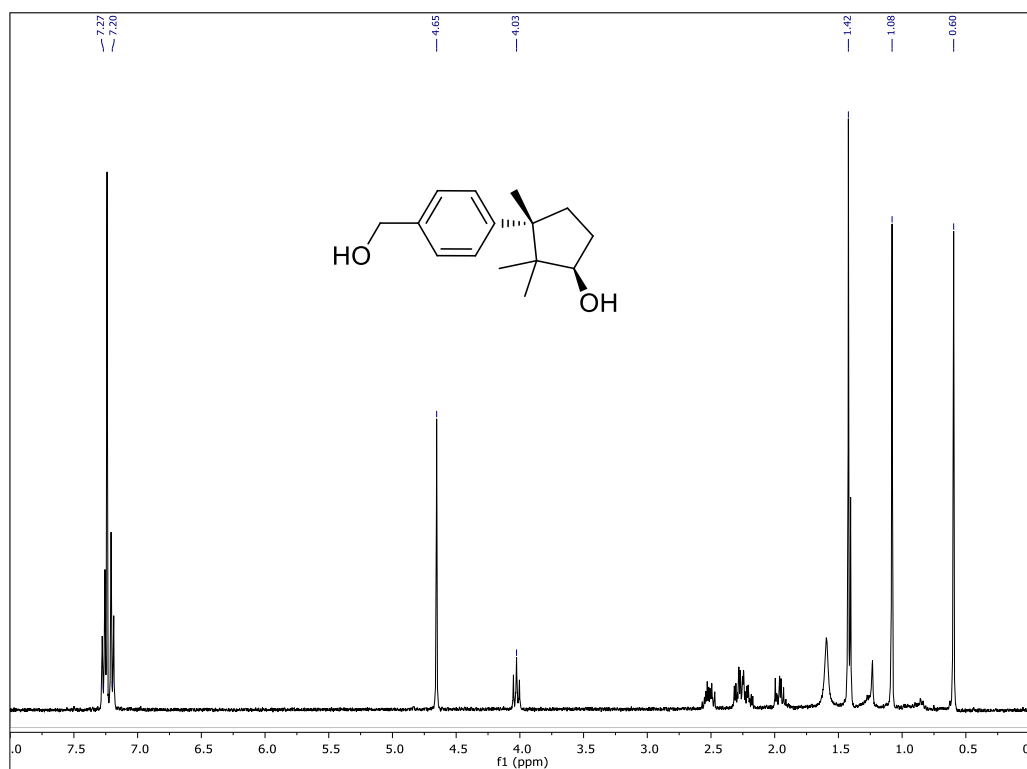

Figure S54. <sup>1</sup>H NMR spectrum (CDCl<sub>3</sub>) of compound 13.

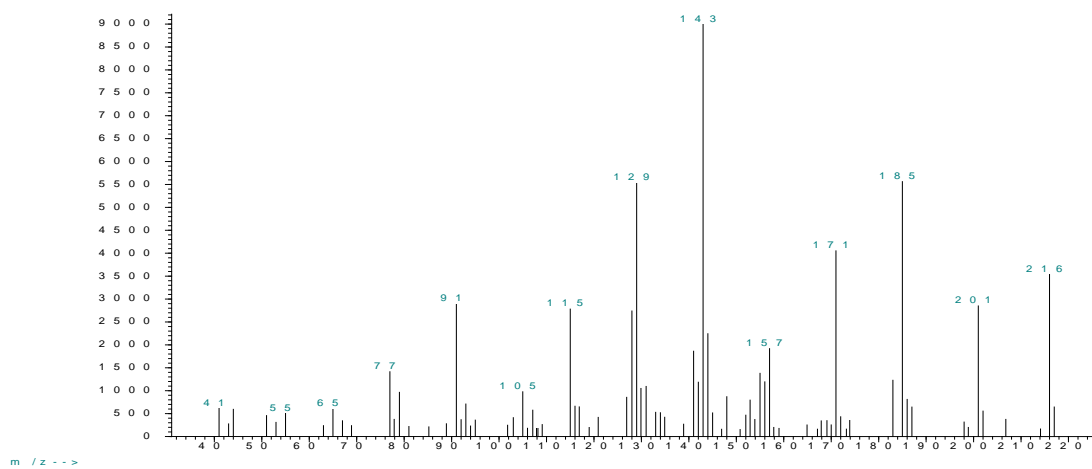

Figure S55. Mass spectrum (LR-EIMS) of compound 13.

[M-H<sub>2</sub>O]<sup>+</sup> observed at *m/z* 216

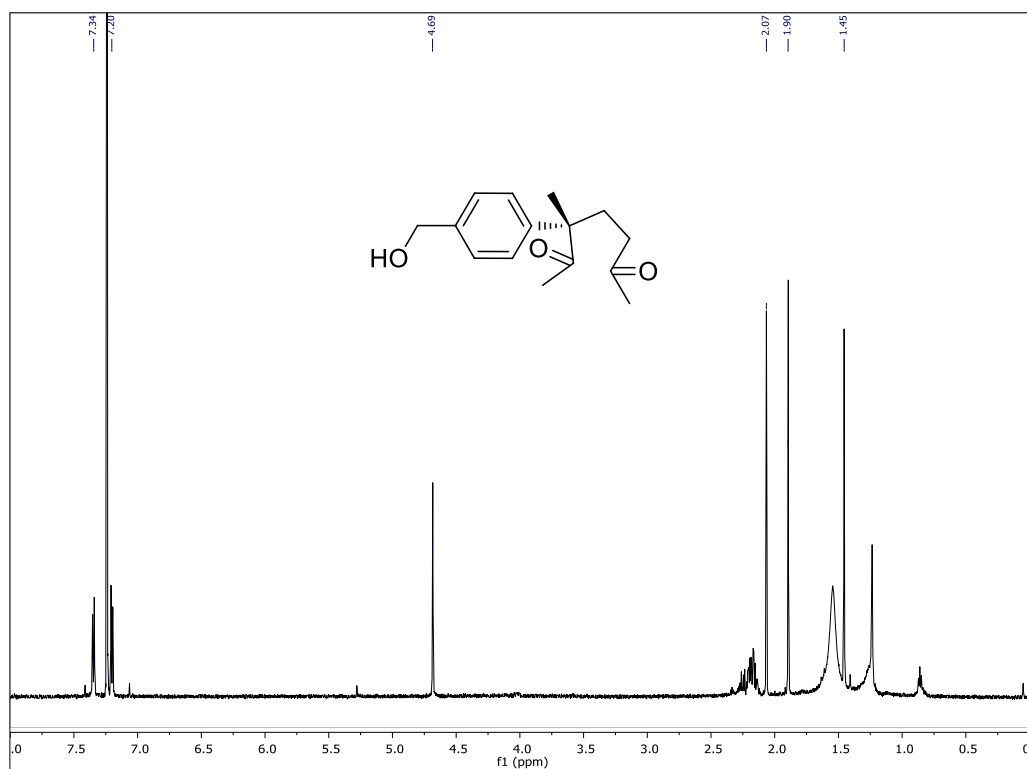

**Figure S56.**  $^1\text{H}$  NMR spectrum ( $\text{CDCl}_3$ ) of compound **14**.

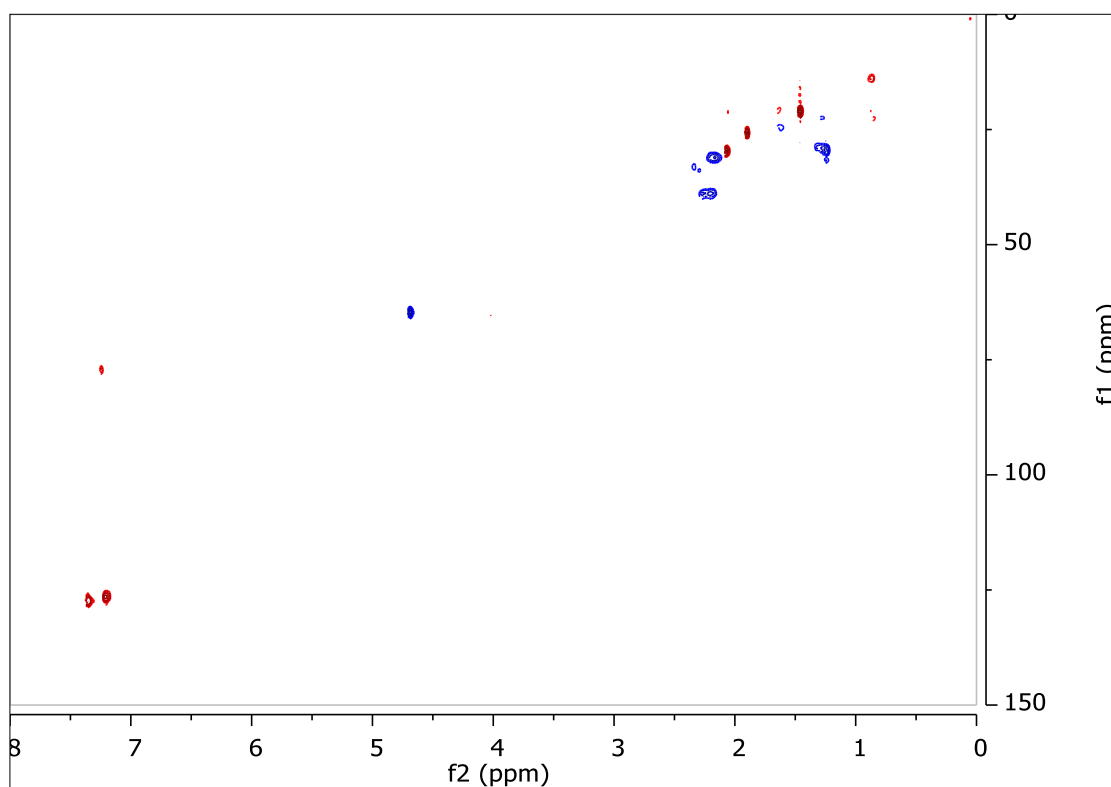

**Figure S57.** HSQC spectrum ( $\text{CDCl}_3$ ) of compound **14**.

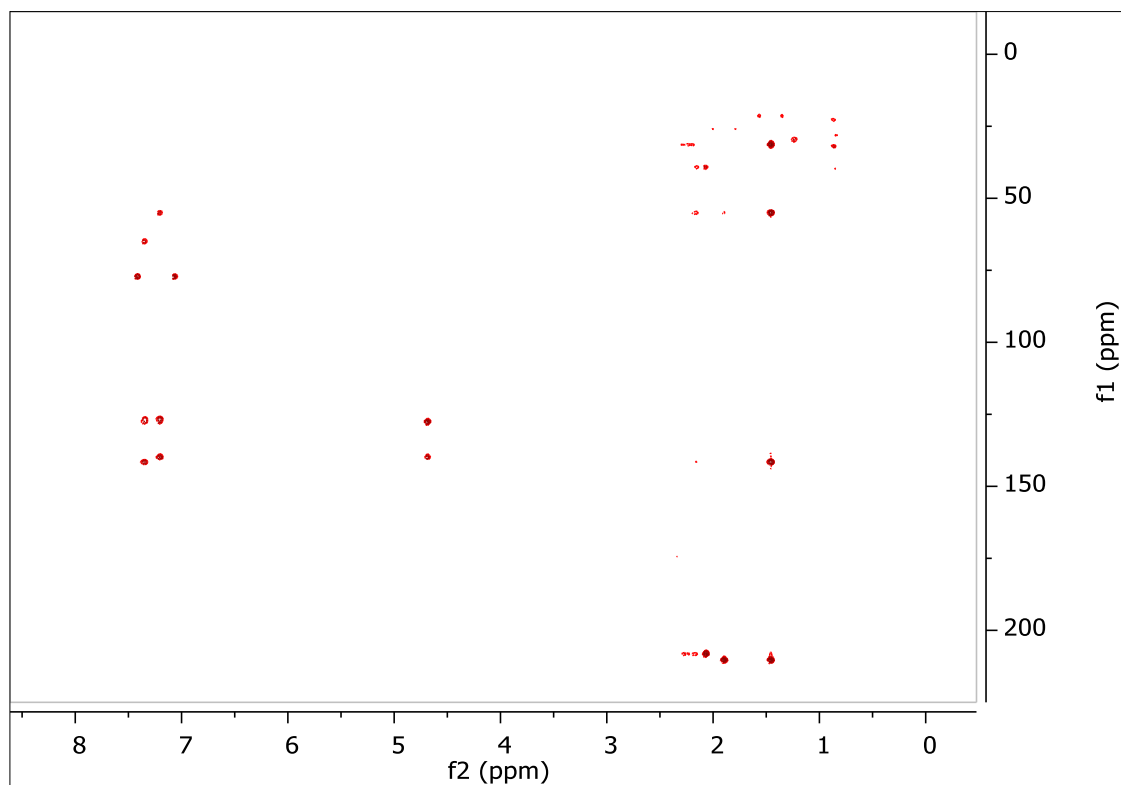

**Figure S58.** HMBC spectrum ( $\text{CDCl}_3$ ) of compound **14**.

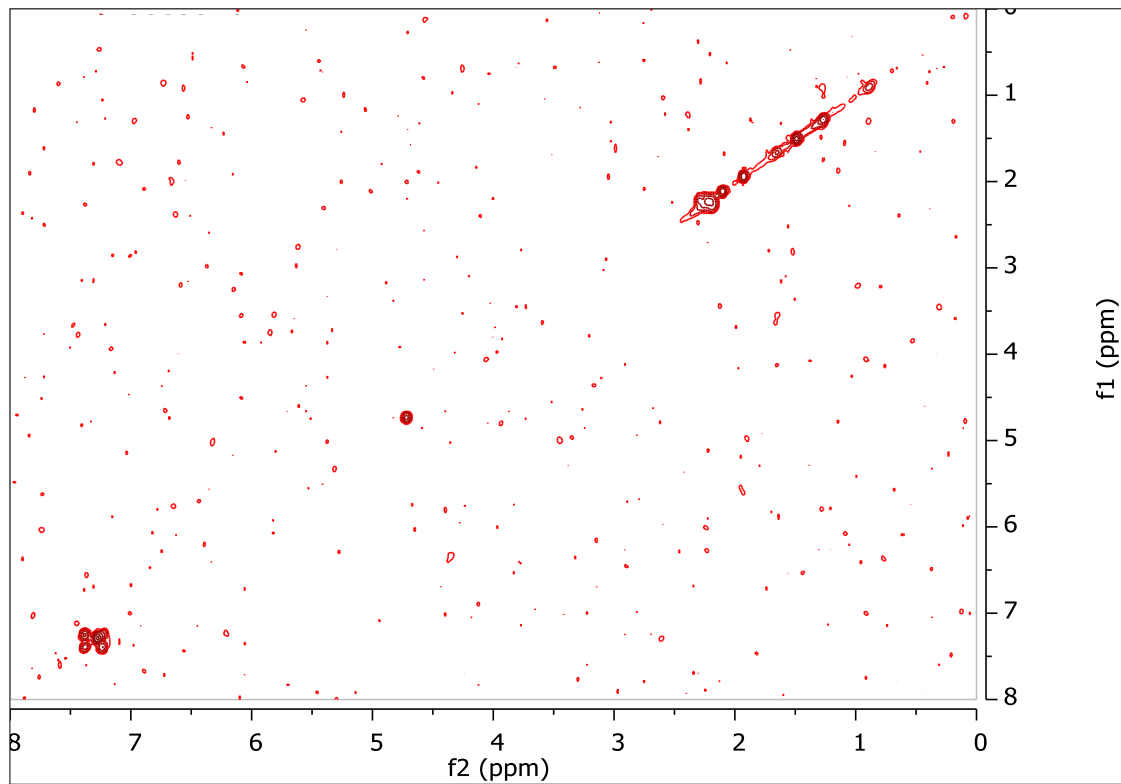

**Figure S59.** COSY spectrum ( $\text{CDCl}_3$ ) of compound **14**.

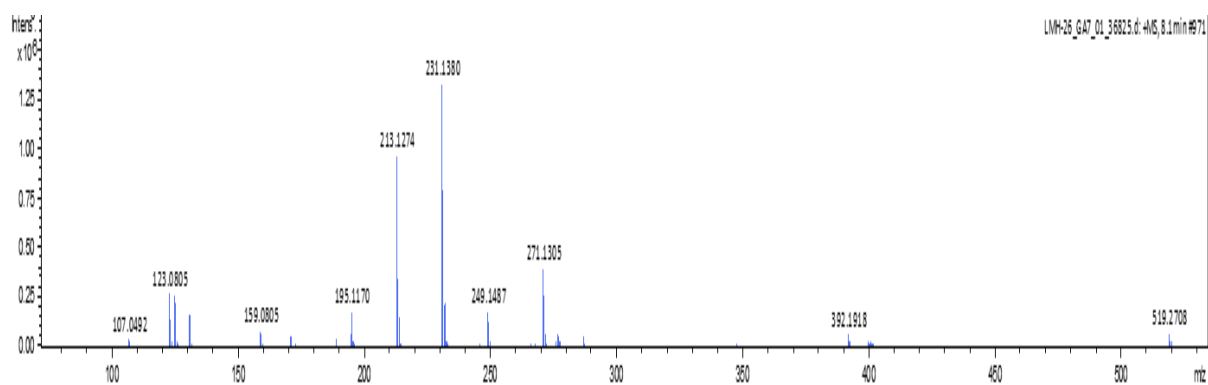

**Figure S60.** Mass spectrum (HR-ESIMS) of compound **14**.  
[M + H]<sup>+</sup> observed at  $m/z$  249.1487, consistent with C<sub>15</sub>H<sub>21</sub>O<sub>3</sub>

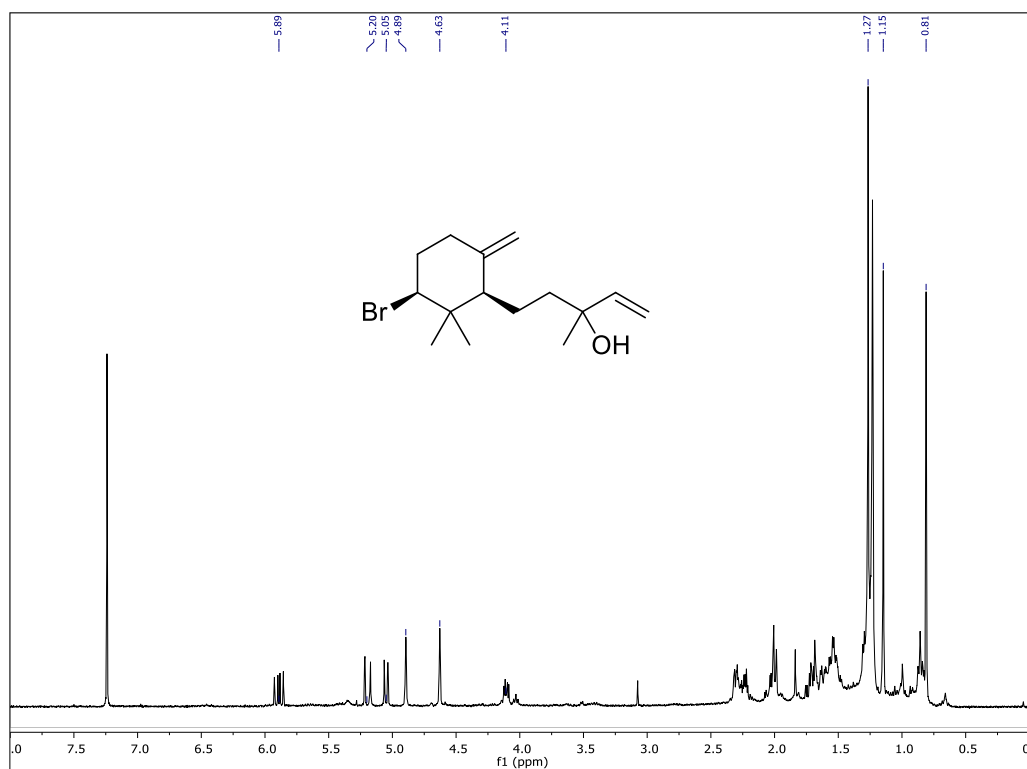

**Figure S61.** <sup>1</sup>H NMR spectrum (CDCl<sub>3</sub>) of compound 15.

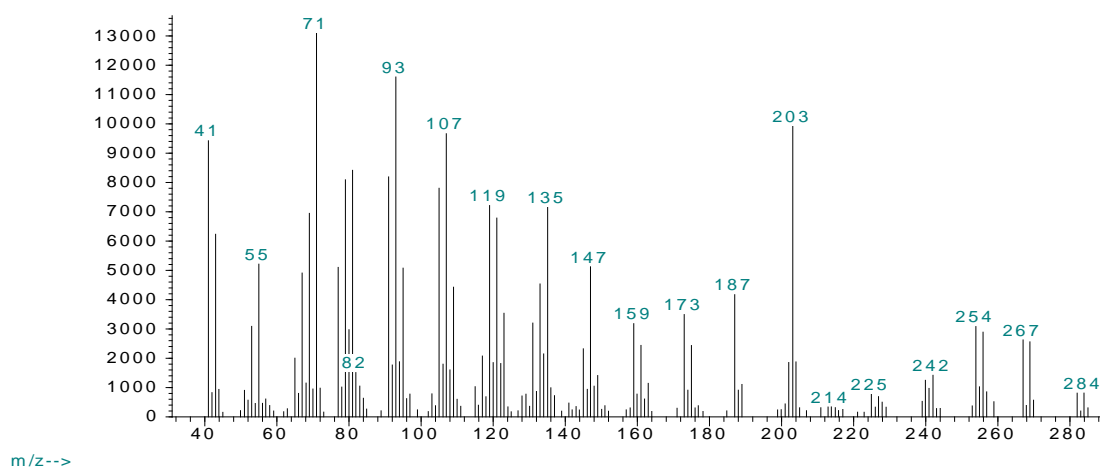

**Figure S62.** Mass spectrum (LR-EIMS) of compound 15.

[M-H<sub>2</sub>O]<sup>+</sup> observed at *m/z* 282 and 284



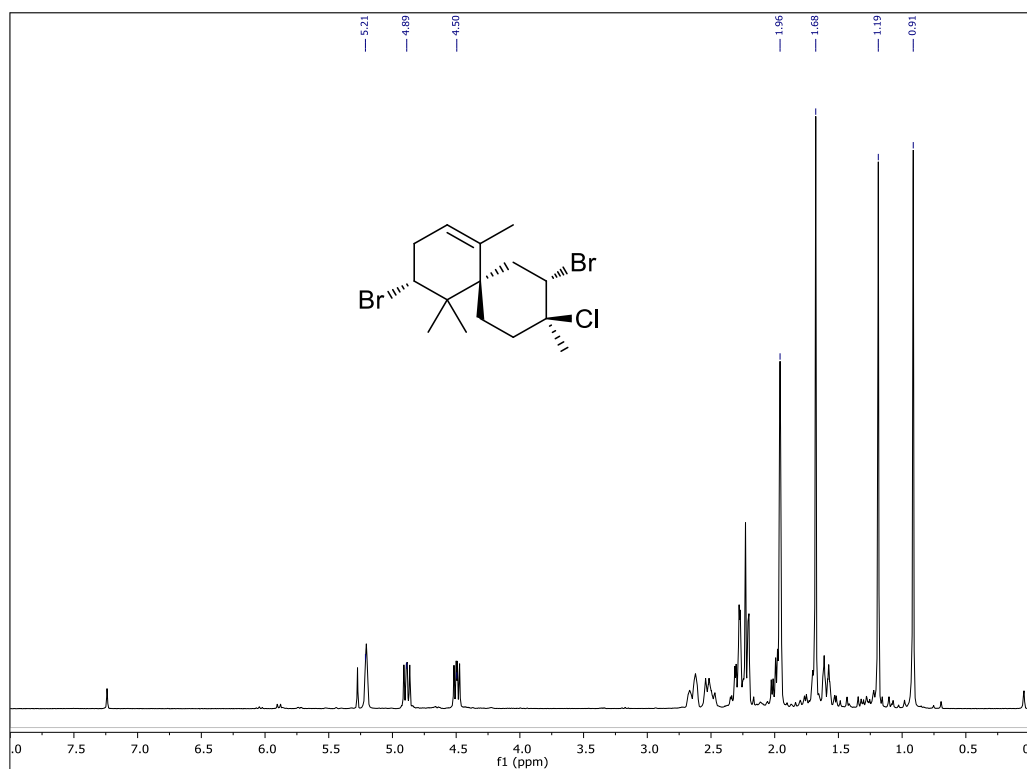

**Figure S63.** <sup>1</sup>H NMR spectrum (CDCl<sub>3</sub>) of compound 16.

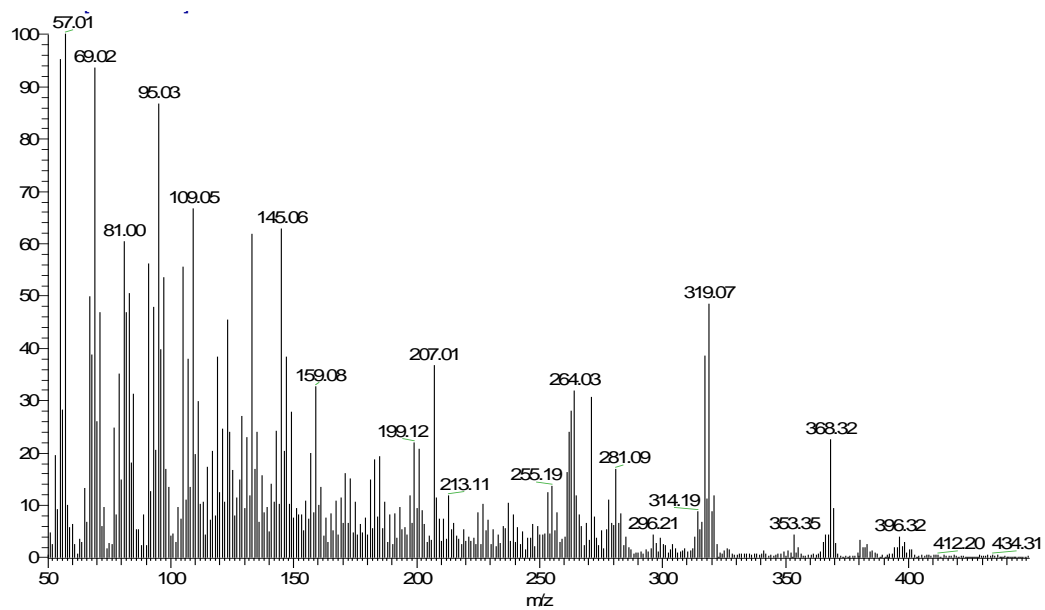

**Figure S64.** Mass spectrum (LR-EIMS) of compound 16.

[M]<sup>+</sup> observed at *m/z* 396, 398, 400 and 402

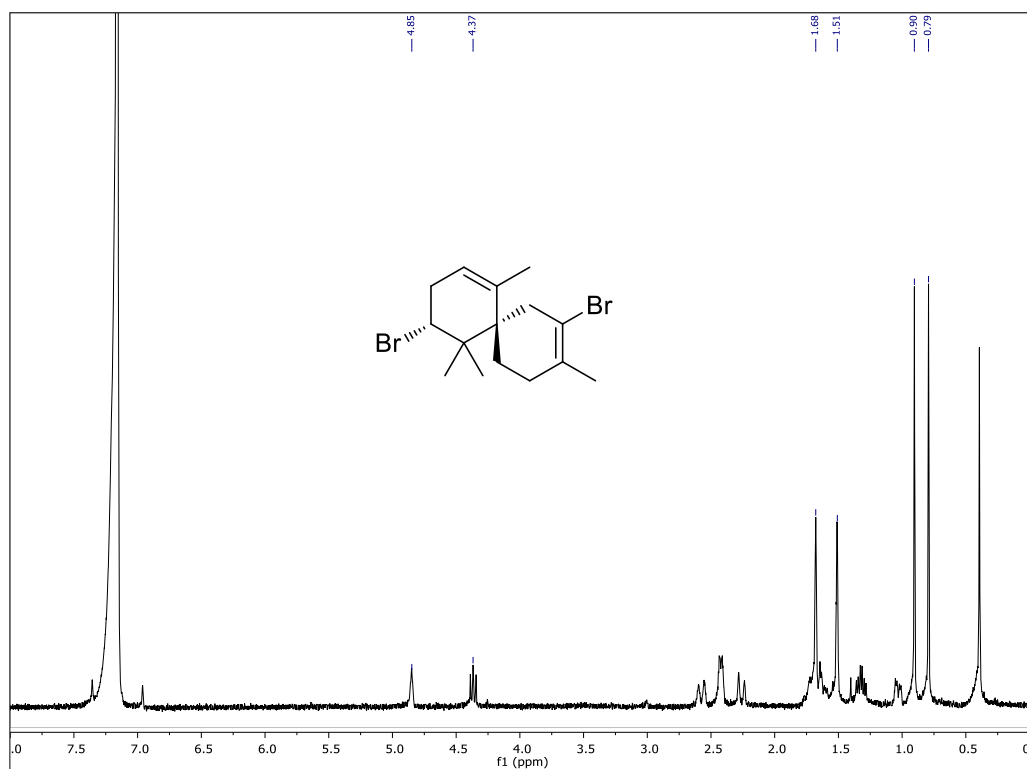

Figure S65. <sup>1</sup>H NMR spectrum (C<sub>6</sub>D<sub>6</sub>) of compound 17.

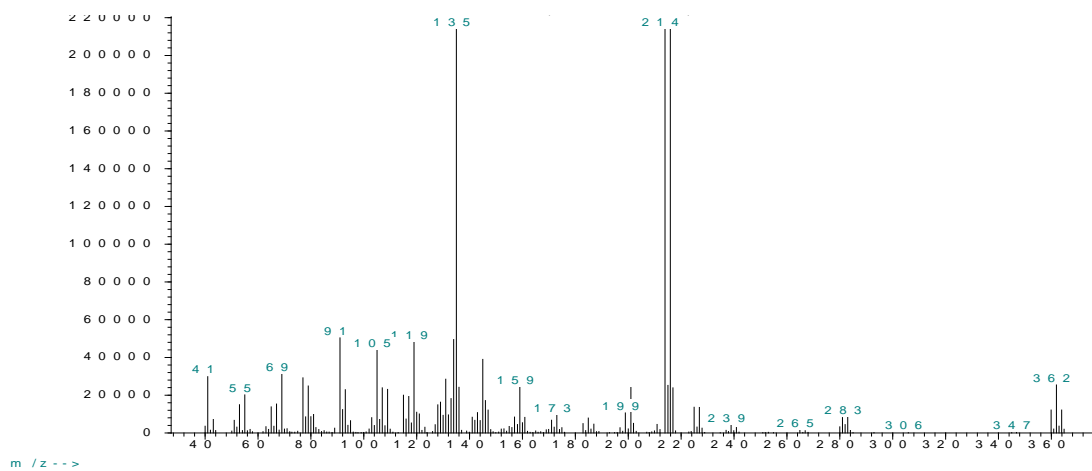

Figure S66. Mass spectrum (LR-EIMS) of compound 17.

[M]<sup>+</sup> observed at *m/z* 360, 362 and 364

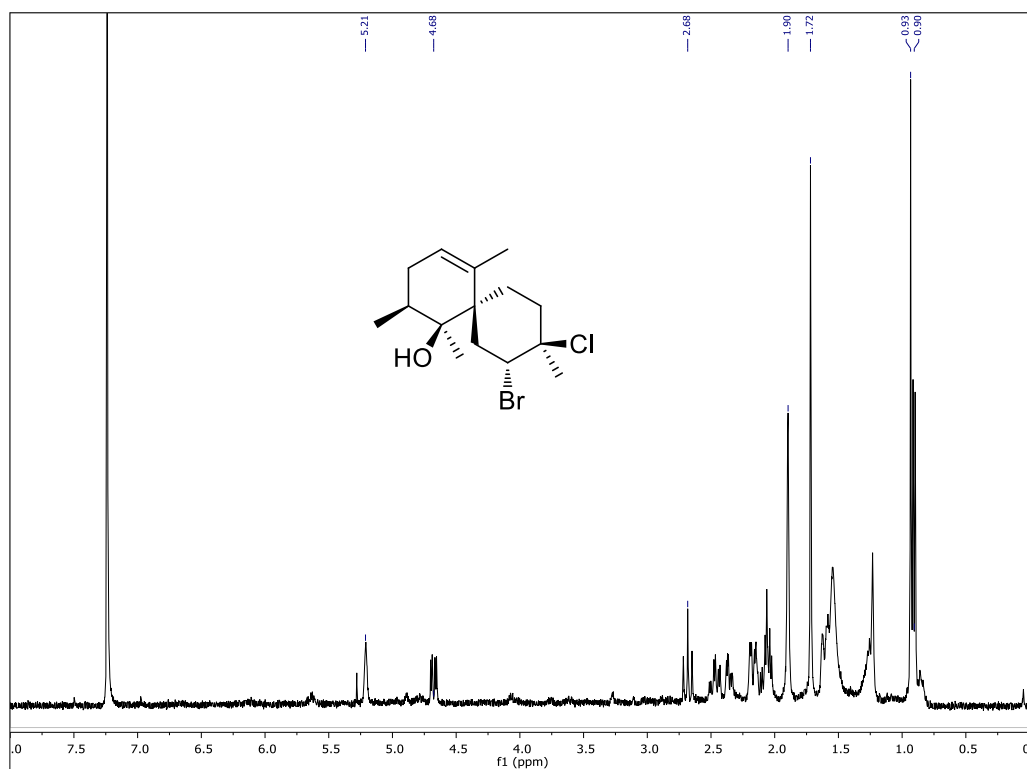

Figure S67. <sup>1</sup>H NMR spectrum (CDCl<sub>3</sub>) of compound 18.

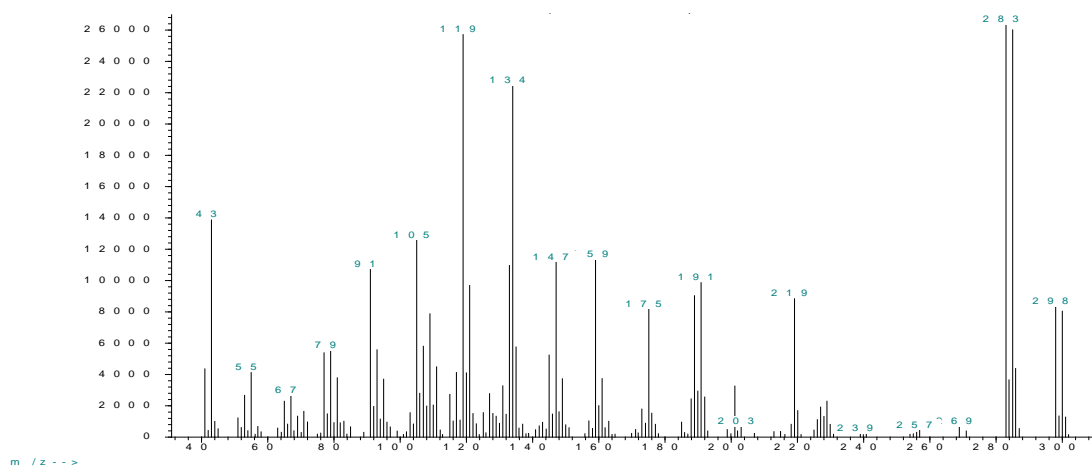

Figure S68. Mass spectrum (LR-EIMS) of compound 18.

[M-HCl]<sup>+</sup> observed at *m/z* 298 and 300

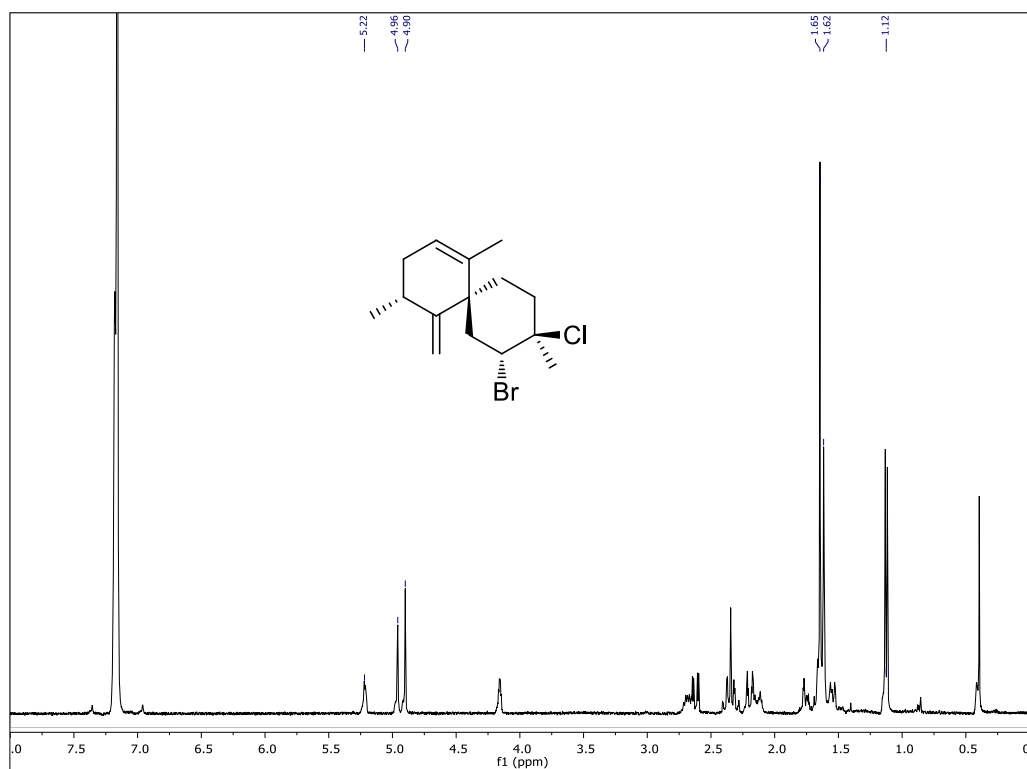

Figure S69. <sup>1</sup>H NMR spectrum (C<sub>6</sub>D<sub>6</sub>) of compound 19.

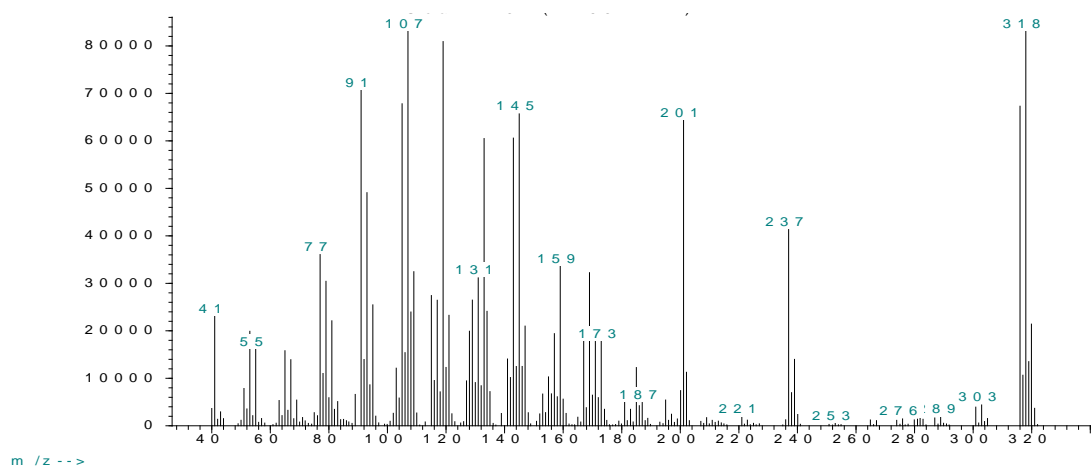

Figure S70. Mass spectrum (LR-EIMS) of compound 19.

[M]<sup>+</sup> observed at *m/z* 316, 318 and 320

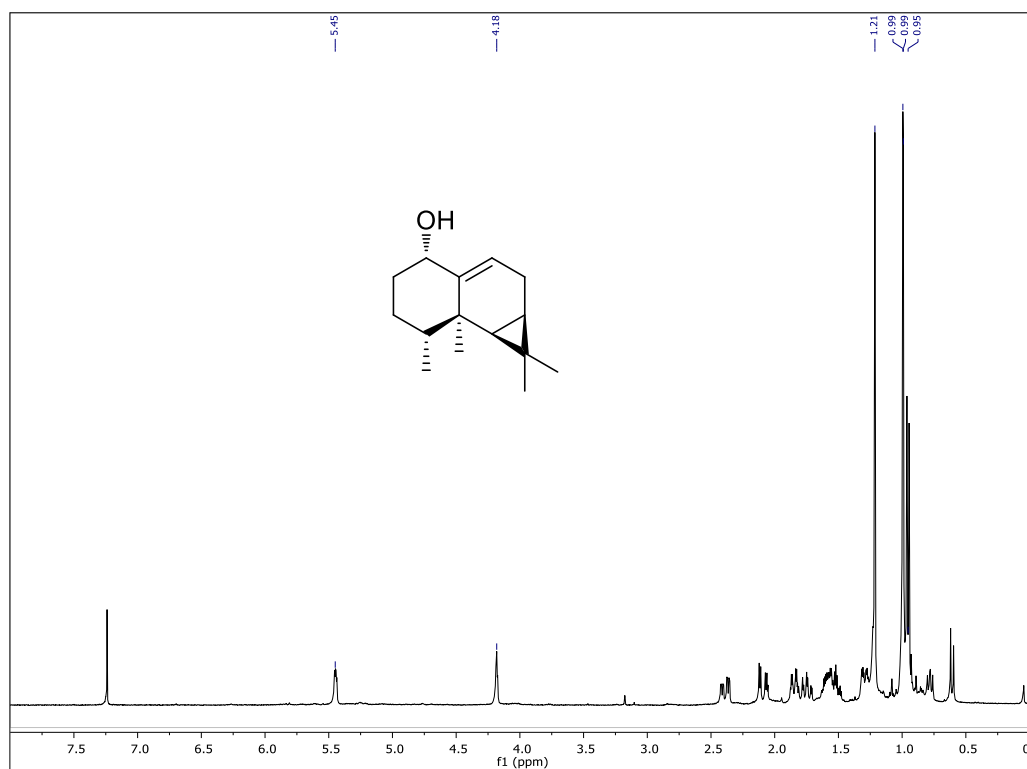

**Figure S71.** <sup>1</sup>H NMR spectrum (CDCl<sub>3</sub>) of compound 20.

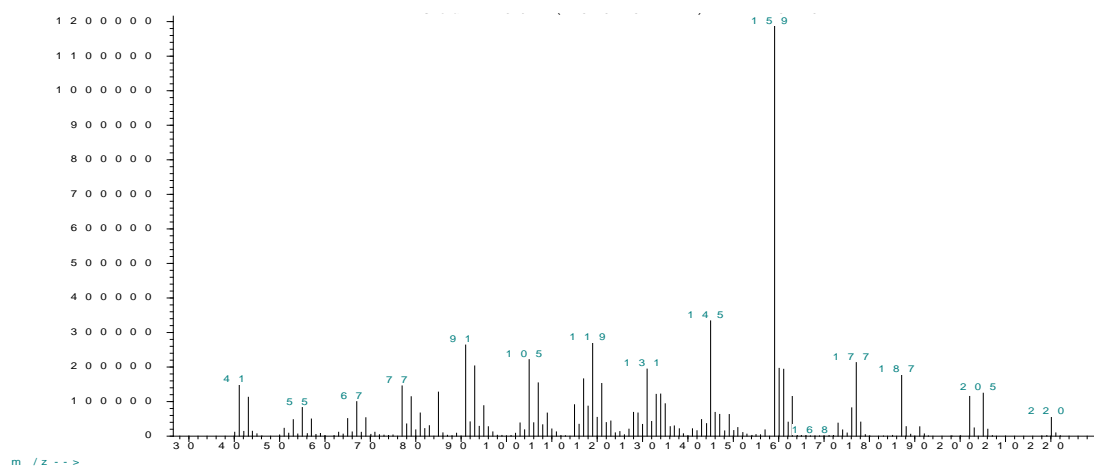

**Figure S72.** Mass spectrum (LR-EIMS) of compound 20.

[M]<sup>+</sup> observed at *m/z* 220

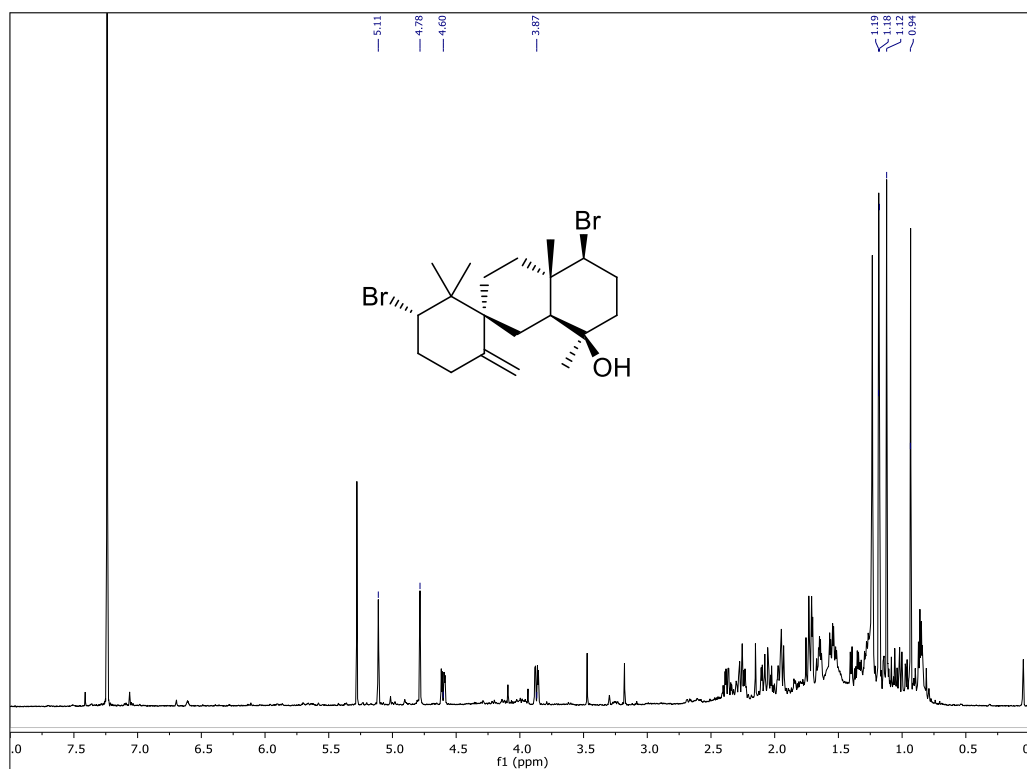

**Figure S73.**  $^1\text{H}$  NMR spectrum ( $\text{CDCl}_3$ ) of compound **21**.

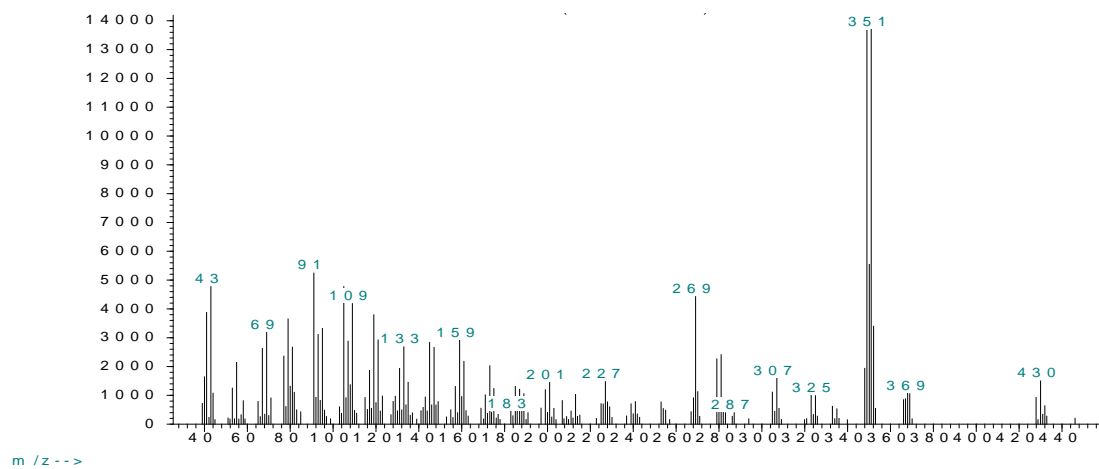

**Figure S74.** Mass spectrum (LR-EIMS) of compound **21**.

$[\text{M}-\text{H}_2\text{O}]^+$  observed at  $m/z$  428, 430 and 432

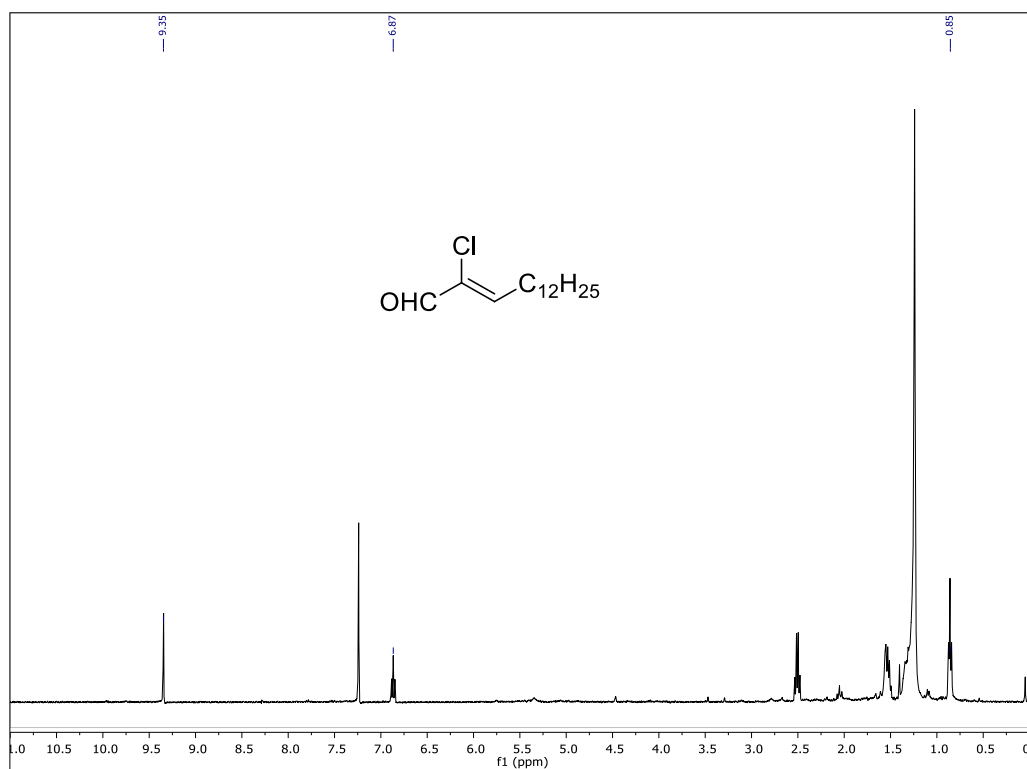

Figure S75. <sup>1</sup>H NMR spectrum (CDCl<sub>3</sub>) of compound 22.

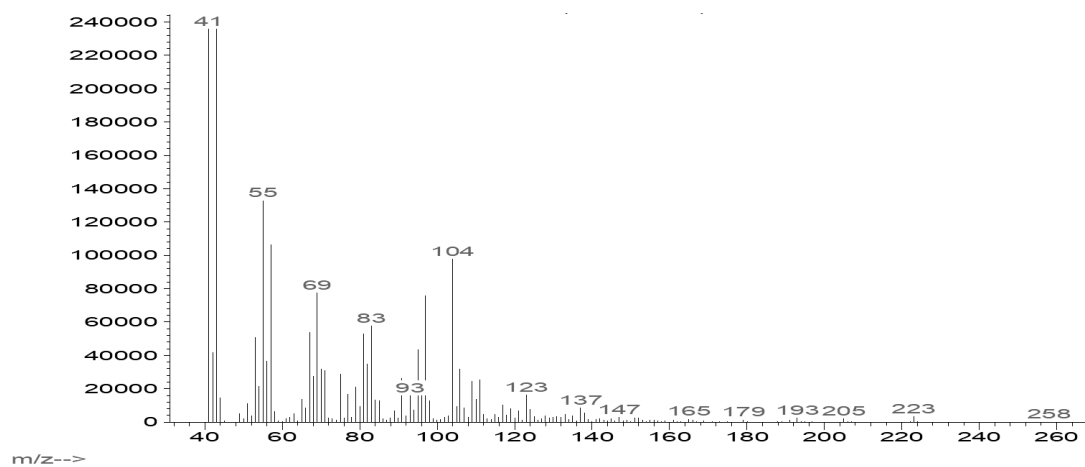

Figure S76. Mass spectrum (LR-EIMS) of compound 22.

[M]<sup>+</sup> observed at *m/z* 258

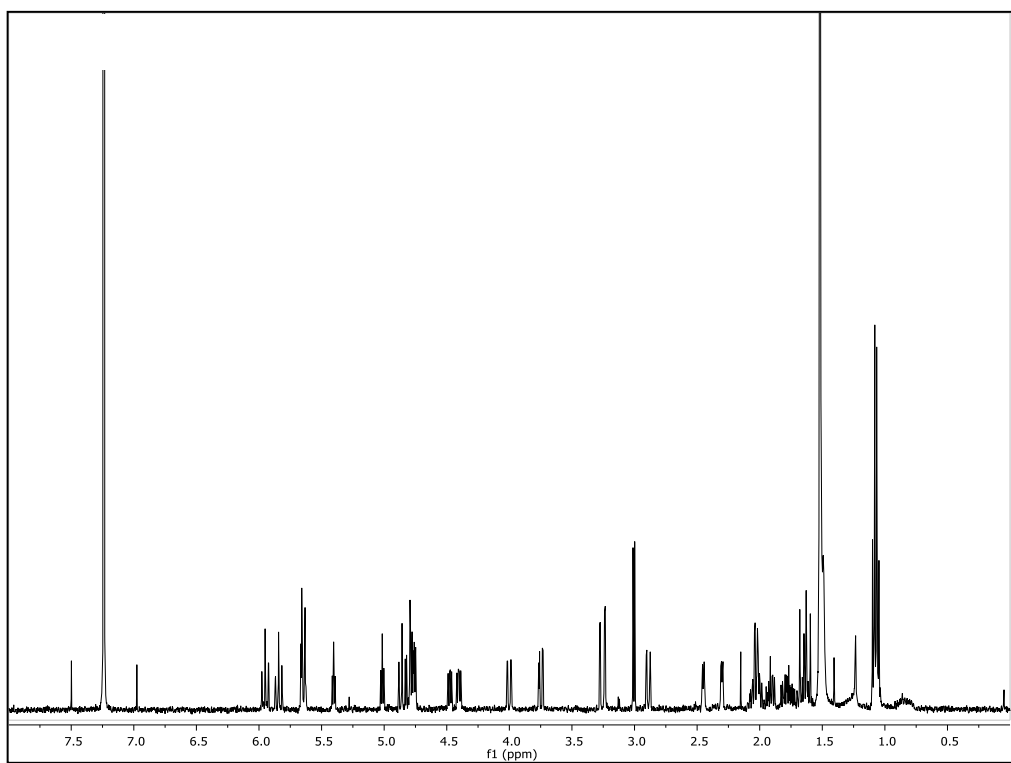

**Figure S77.**  $^1\text{H}$  NMR spectrum ( $\text{CDCl}_3$ ) of compounds **23** and **24** (at a 1:1 ratio).

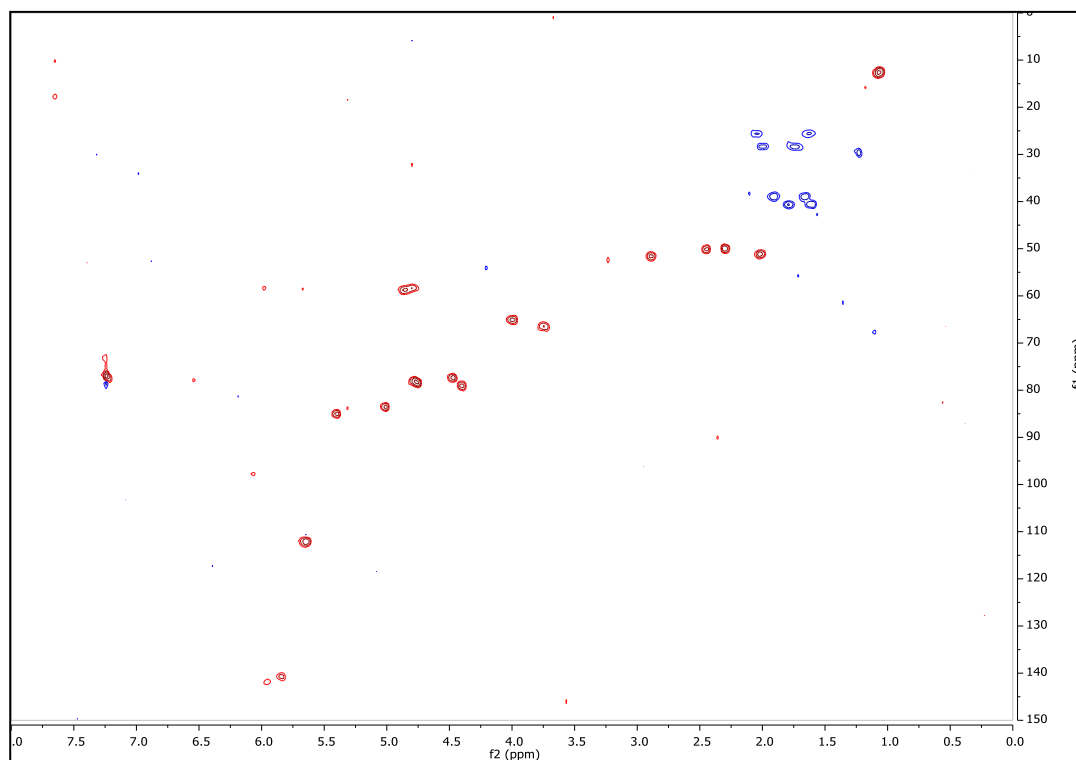

**Figure S78.** HSQC spectrum ( $\text{CDCl}_3$ ) of compounds **23** and **24** (at a 1:1 ratio).



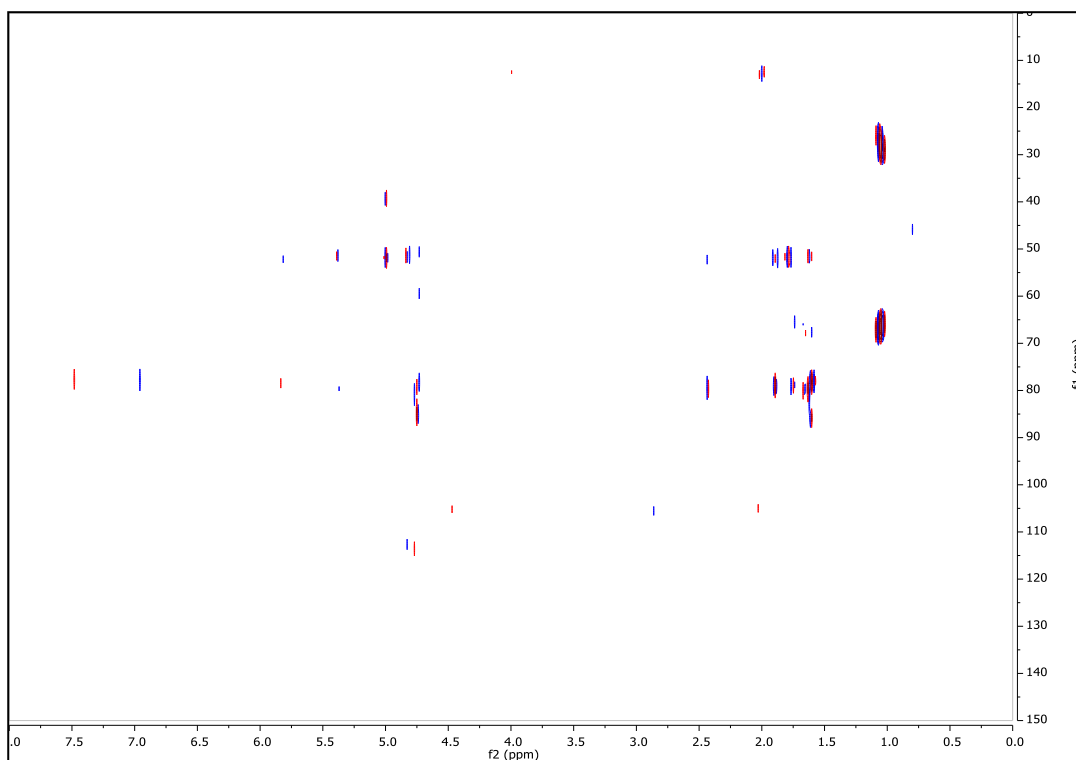

**Figure S79.** HMBC spectrum ( $\text{CDCl}_3$ ) of compounds **23** and **24** (at a 1:1 ratio).

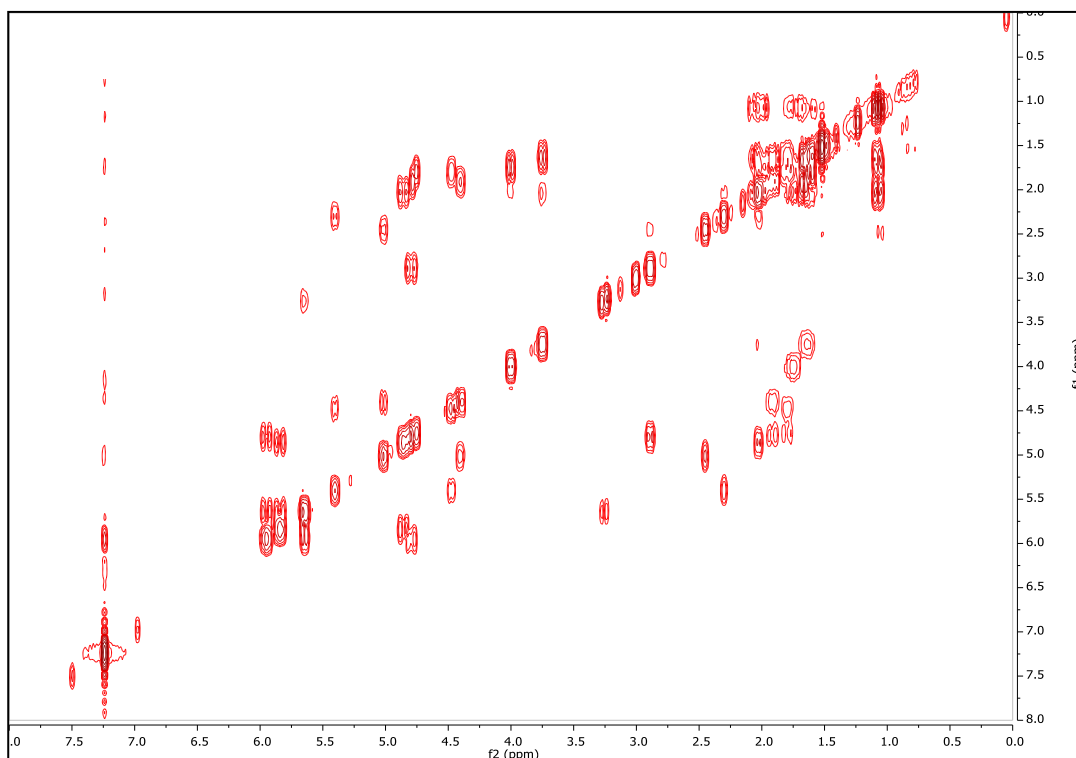

**Figure S80.** COSY spectrum ( $\text{CDCl}_3$ ) of compounds **23** and **24** (at a 1:1 ratio).

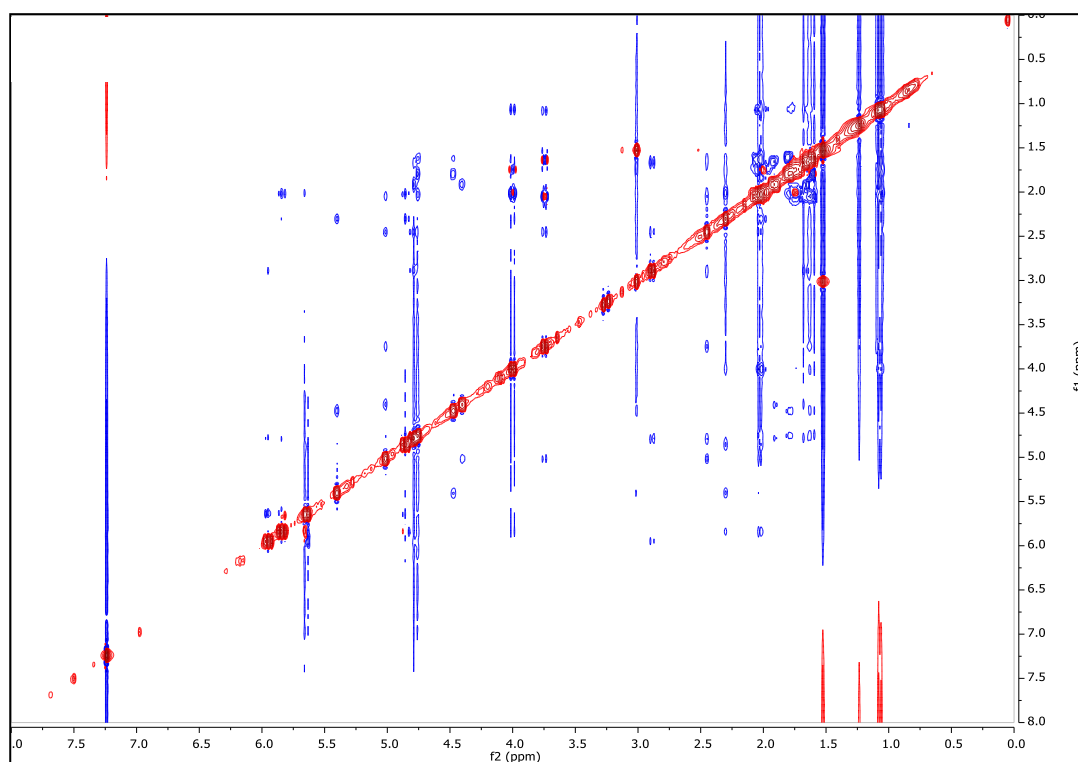

**Figure S81.** NOESY spectrum (CDCl<sub>3</sub>) of compounds **23** and **24** (at a 1:1 ratio).

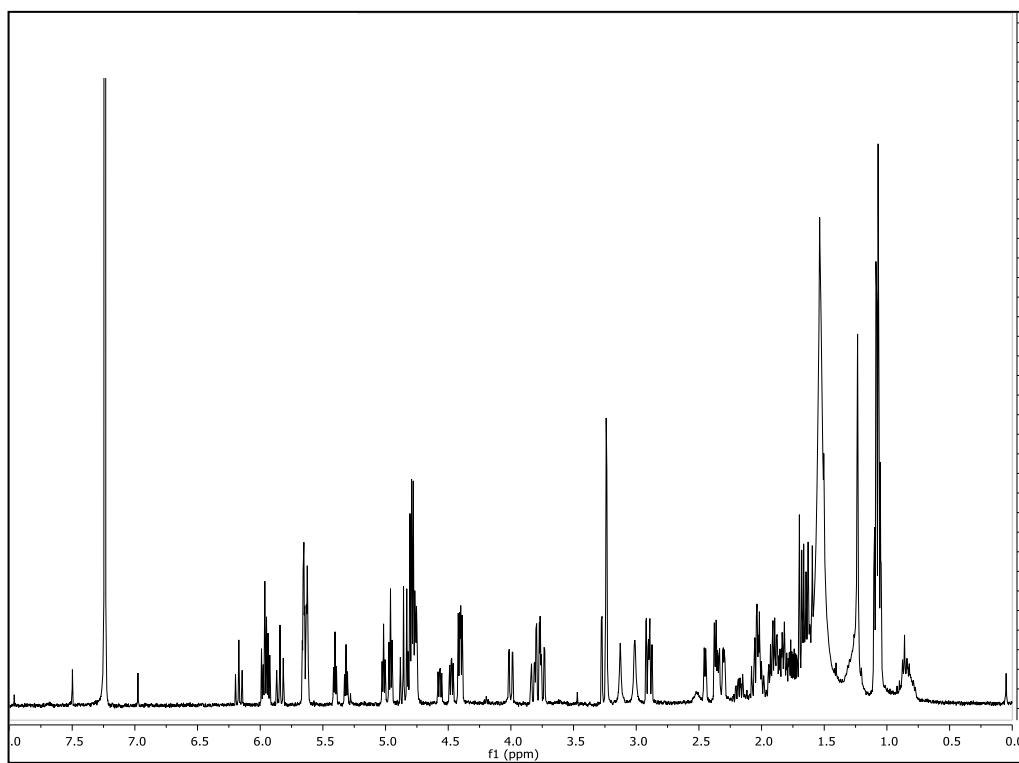

**Figure S82.**  $^1\text{H}$  NMR spectrum ( $\text{CDCl}_3$ ) of compounds **23–26** (at a 1:2:1:2 ratio).

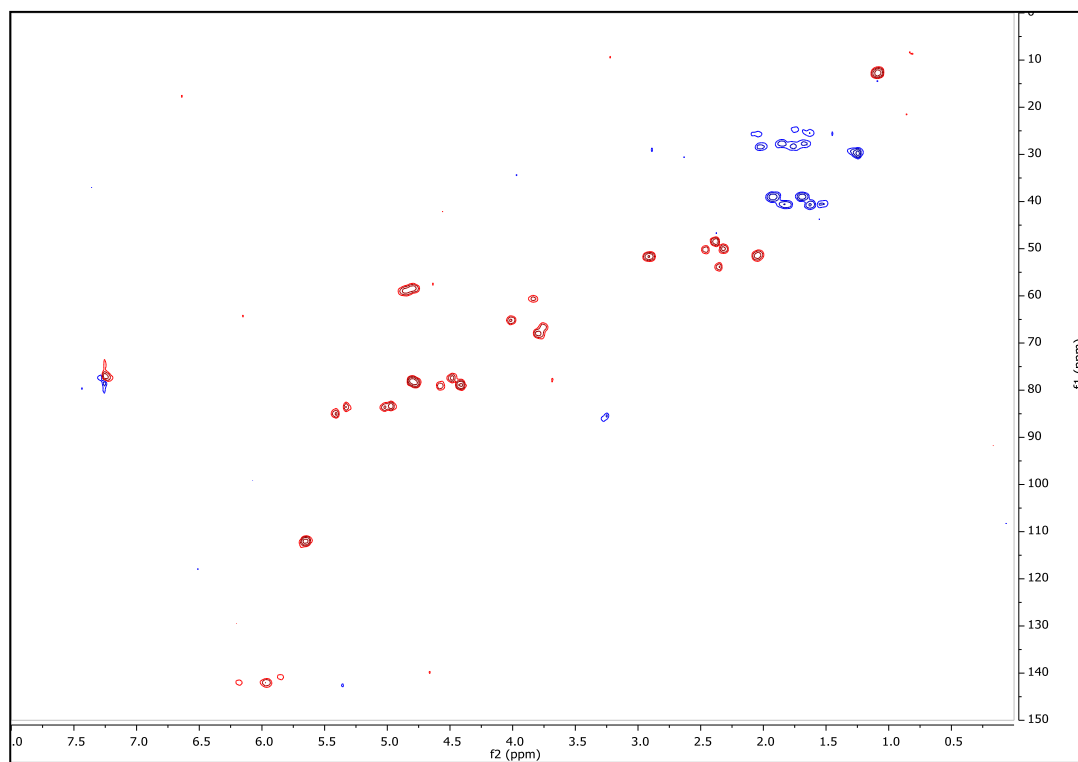

**Figure S83.** HSQC spectrum ( $\text{CDCl}_3$ ) of compounds **23–26** (at a 1:2:1:2 ratio).

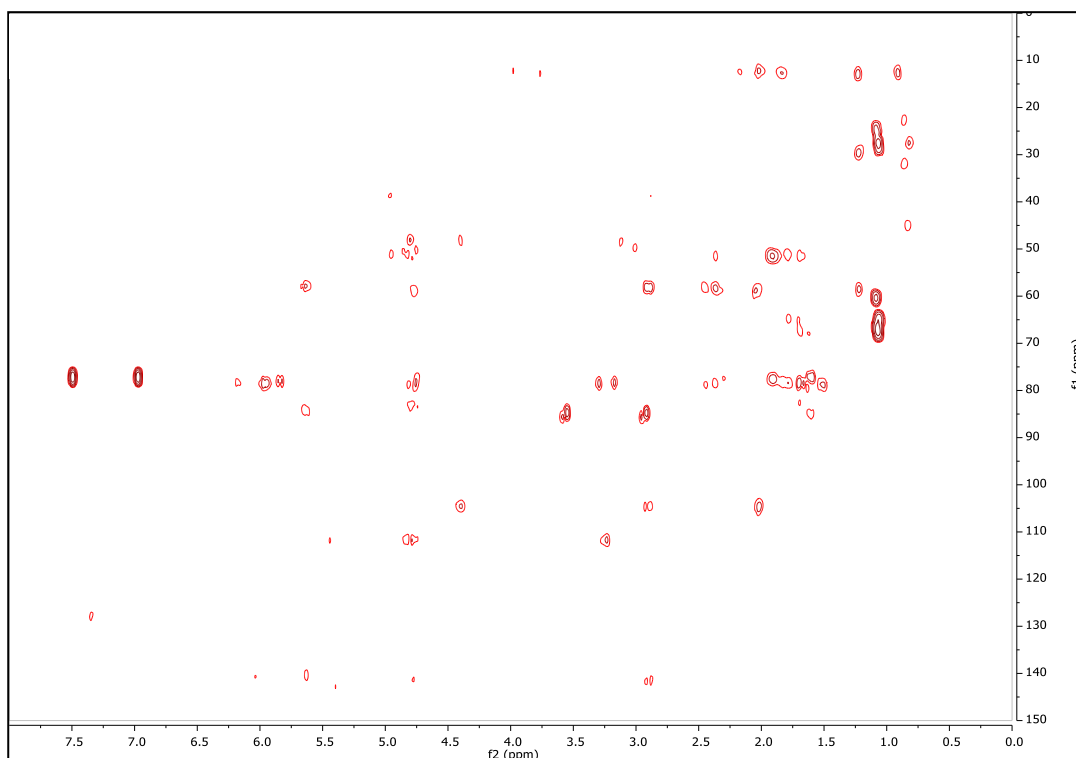

**Figure S84.** HMBC spectrum (CDCl<sub>3</sub>) of compounds **23–26** (at a 1:2:1:2 ratio).

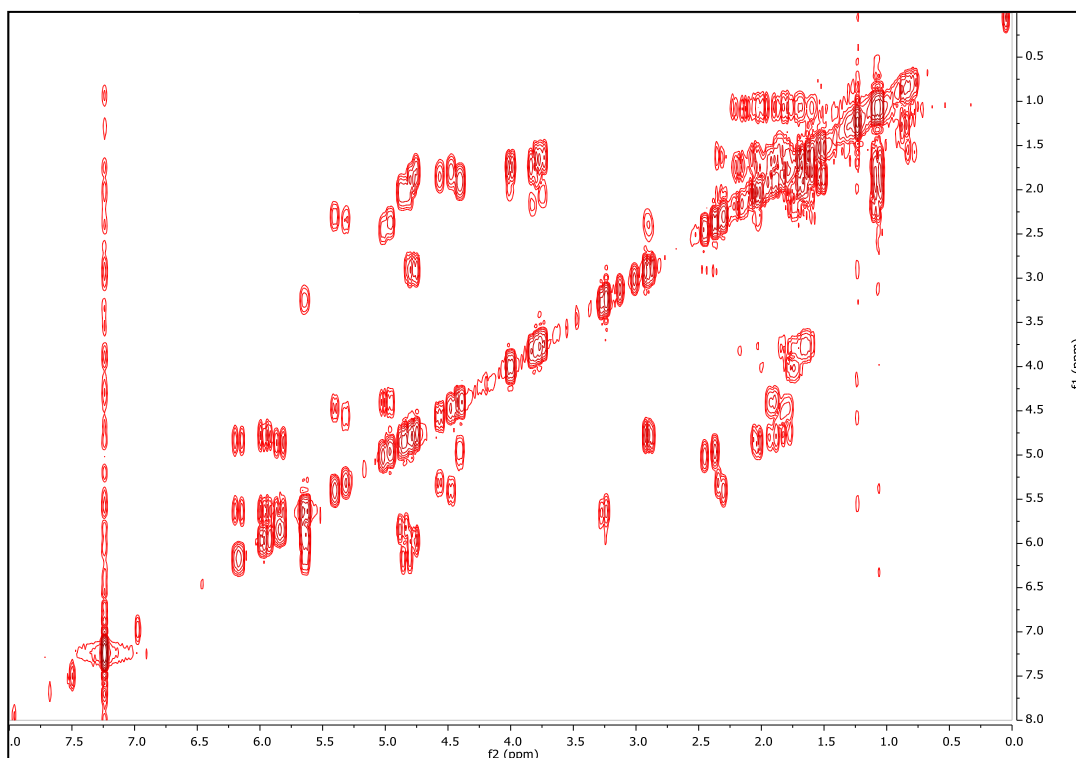

**Figure S85.** COSY spectrum (CDCl<sub>3</sub>) of compounds **23–26** (at a 1:2:1:2 ratio).

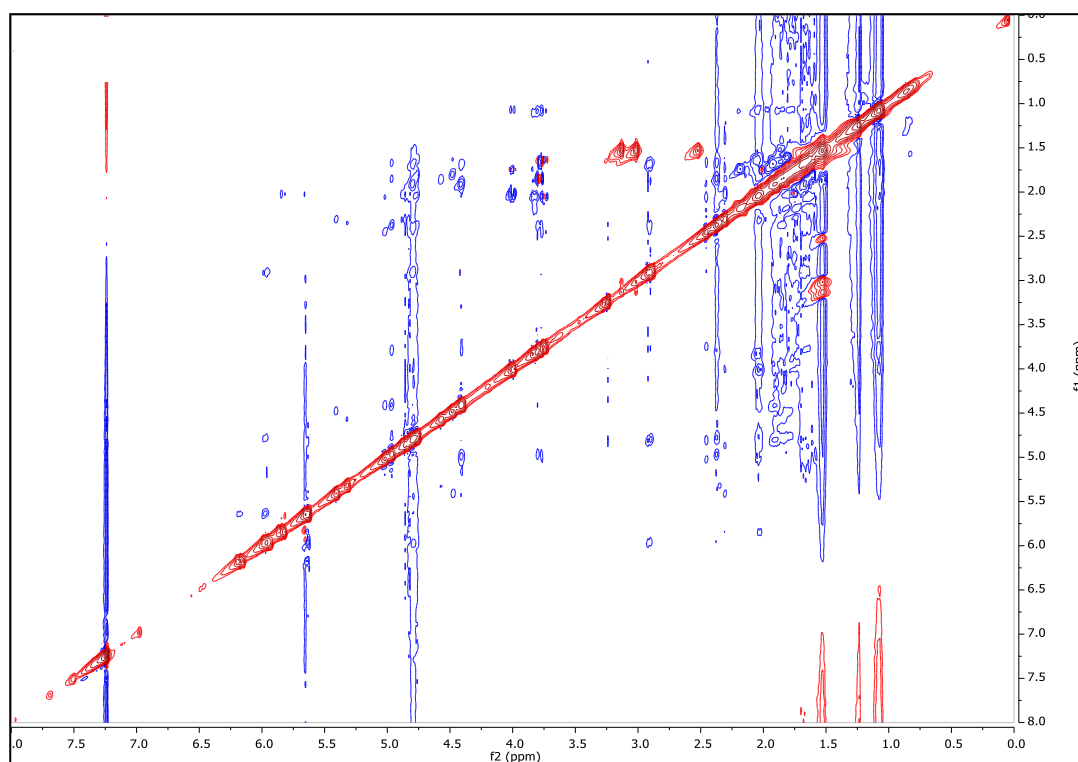

**Figure S86.** NOESY spectrum ( $\text{CDCl}_3$ ) of compounds **23–26** (at a 1:2:1:2 ratio).
